# Supplementary material for: Simulation-based inter-professional education to improve attitudes towards collaborative practice: a prospective comparative pilot study in a Chinese medical centre
Source: PubMed Central journal article supplement — BMJ Open. 2017 Nov 8;7(11):e015105. doi: 10.1136/bmjopen-2016-015105 (PMC5695335; doi:10.1136/bmjopen-2016-015105), 2017-11-08
Supplement: bmjopen-2016-015105.draft_revisions.pdf [file bmjopen-2016-015105.draft_revisions.pdf]

# BMJ Open

BMJ Open is committed to open peer review. As part of this commitment we make the peer review history of every article we publish publicly available.

When an article is published we post the peer reviewers' comments and the authors' responses online. We also post the versions of the paper that were used during peer review. These are the versions that the peer review comments apply to.

The versions of the paper that follow are the versions that were submitted during the peer review process. They are not the versions of record or the final published versions. They should not be cited or distributed as the published version of this manuscript.

BMJ Open is an open access journal and the full, final, typeset and author-corrected version of record of the manuscript is available on our site with no access controls, subscription charges or pay-per-view fees (<http://bmjopen.bmj.com>).

If you have any questions on BMJ Open's open peer review process please email [editorial.bmjopen@bmj.com](mailto:editorial.bmjopen@bmj.com)

# BMJ Open

**Stepwise inter-professional educational intervention with post-simulation DAA debriefing plus benchmarking-sharing cultivates trainees as inter-professional collaboration's seed instructors: a prospective comparative study**

|                                 |                                                                                                                                                                                 |
|---------------------------------|---------------------------------------------------------------------------------------------------------------------------------------------------------------------------------|
| Journal:                        | <i>BMJ Open</i>                                                                                                                                                                 |
| Manuscript ID                   | bmjopen-2016-015105                                                                                                                                                             |
| Article Type:                   | Research                                                                                                                                                                        |
| Date Submitted by the Author:   | 08-Nov-2016                                                                                                                                                                     |
| Complete List of Authors:       | Yang, Ling-Yu<br>Yang, Ying-Ying<br>Huang, Chia-Chang; Clinical skill training center<br>Liang, Jen-Feng<br>Lee, Fa-Yauh<br>Cheng, Hao-Min<br>Huang, Chin-Chou<br>Kao, Shou-Yen |
| <b>Primary Subject Heading</b>: | Medical education and training                                                                                                                                                  |
| Secondary Subject Heading:      | Communication                                                                                                                                                                   |
| Keywords:                       | nurses, pharmacists, inter-professional collaboration, interdisciplinary education perception, attitudes towards health care teams                                              |
|                                 |                                                                                                                                                                                 |

SCHOLARONE™  
Manuscripts

only

1  
2  
3 **Stepwise inter-professional educational intervention with post-simulation DAA**  
4 **debriefing plus benchmarking-sharing cultivates trainees as inter-professional**  
5 **collaboration's seed instructors: a prospective comparative study**  
6  
7

8  
9 Ling-Yu Yang,<sup>2</sup> Ying-Ying Yang,<sup>1,3,5</sup> Chia-Chang Huang,<sup>1,3,5</sup> Jen-Feng Liang,<sup>2,5</sup>  
10 Fa-Yauh Lee,<sup>3,5</sup> Hao Min Cheng,<sup>2,5</sup> Chin-Chou Huang,<sup>1,3,5</sup> Shou-Yen Kao,<sup>3,5</sup>  
11  
12

13  
14  
15 <sup>1</sup>Division of Clinical Skills Training, <sup>2</sup>Department of Medical Education, <sup>3</sup>Department  
16 of Medicine, <sup>4</sup>Taipei Veterans General Hospital, Taipei, Taiwan  
17

18  
19 <sup>5</sup>Department of Medicine, National Yang-Ming University, Taipei, Taiwan  
20

21 **Correspondence to**  
22

23  
24 Ying-Ying Yang; [yangyy@vghtpe.gov.tw](mailto:yangyy@vghtpe.gov.tw)  
25  
26  
27  
28  
29  
30  
31  
32  
33  
34  
35  
36  
37  
38  
39  
40  
41  
42  
43  
44  
45  
46  
47  
48  
49  
50  
51  
52  
53  
54  
55  
56  
57  
58  
59  
60

**ABSTRACT**

**Objectives:** Continuous inter-professional education (IPE) is crucial to building inter-professional collaboration (IPC) attitude/skills of health professionals and providing holistic patient care. This interventional IPE program aims to evaluate whether pre-simulation training and benchmarking-sharing strategy were able to successfully cultivate seed instructors for improving their team members' IPC attitudes.

**Design:** Prospective, pre-post comparative cross-sectional study.

**Setting/participants:** Voluntary 34 physicians, 30 nurses and 24 pharmacists were trained as seed instructor by 3.5-hr preparation and 3.5-hr simulation workshops. Then, participants (n=88) drew lots to decide 44 presenters (group 1), half of each profession, in benchmarking-sharing, formed group 1, while remaining participants formed group 2. Facilitator-assessment was used to measure the transference and sustainability of the learnt IPC skills based on the benchmarking-sharing presentation.

**Results:** For three professions, improvement in IPC attitude was identified by sequential increase in the post-course (2<sup>nd</sup> month, T<sub>2</sub>) and end-of-study (3<sup>rd</sup> month, T<sub>3</sub>) interdisciplinary education perception scale (IEPS) and Attitudes Towards Health Care Teams Scale (ATHCTS) scores compared to pre-courses (1<sup>st</sup> month, T<sub>1</sub>) scores. The degree of improvement in IPC attitude was higher among nurses and pharmacists than physicians. The post-training benchmarking-sharing was found to further improve the IPC attitude of the group 1 participants. The instructor's assessments indicated better transference and sustainability of IPE intervention-trained "coordination, communication, teamwork, and leadership" skills among group 1 nurses and pharmacists than group 1 physicians. The post-intervention randomly sampling survey (6<sup>th</sup> month, T<sub>post</sub>) found that the IPC attitude of three professions had undergone significant improvement after on-site IPC skills promotion by this step-wise program-trained seed instructors within their teams.

**Conclusions:** Addition of pre-simulation training and benchmarking-sharing to conventional simulation-based IPE courses significantly enhances attitude, self-reflection, transferences and sustainability of newly trained seed IPC instructors. Furthermore, this continuous intervention led to improvements in IPC attitudes within teams across all three professions.

**Keywords:** nurses, pharmacists, inter-professional collaboration, interdisciplinary education perception, attitudes towards health care teams

**Strengths and limitations of this study**

- This study describes the experiences of a prospective cross-sectional cohort of voluntary physicians, nurses and pharmacists who receiving stepwise simulation-based IPE for cultivating them as seed instructors to improve team members' IPC attitude.
- Facing unsolved problem of previous simulation-based IPE, pre-simulation training plus benchmarking-sharing are implemented to provide participants a well preparation, self-reflection and continuous assessment's training.
- Serial Kirkpatrick 1-4 levels-based assessments in this study help to thoughtfully evaluate the effectiveness of this new IPE intervention.
- In addition to consecutive assessments of self-efficiency by participants, facilitators evaluate the transference and sustainability of learnt skills regarding IPC to workplace from their benchmarking-sharing.
- However, lack of control group, un-blinded assessment by instructoss and self-assessment/survey make this research susceptible to responder bias.
- Voluntary participants with high motivation are easier to be successfully cultivated as proficient seed instructors but it will also results in some degree of selection bias.
- These results are limited to experience in one institution; the degree to which this can be extrapolated to IPE training in other institutions is not known.

## INTRODUCTION

Inter-professional education (IPE) aims to improve the coordination, communication, teamwork, leadership skills of health professionals.<sup>1</sup> Simulations provide unique experiences that should to improve the above mentioned collaboration skills of the trainees. The power of simulations lies in their fidelity and interactivity; these reach beyond didactic learning and lead to more sustainable effects on the participants. Health care simulations are recognized as an ideal vehicle for IPE.<sup>2</sup> Today's patients have complex chronic health issues that need inter-professional collaboration (IPC) in order to delivery well-coordinated, high-quality and patient-centered care.<sup>3 4</sup> Simulation-enhanced IPE helps the development of a health professional's IPC skills and these are very important when managing critical clinical situations.<sup>5</sup> Post-simulation debriefing is a forum by which bedside team members engage and have the opportunity to carry out thoughtful communication, the aim of which is to make patient care safer. The inclusion of all relevant medical professions in the debriefing process reinforces the unique role and contribution of each team member when developing improvements to a given system.

Simulation-based IPE prepares future health professionals, including medical students, nursing students and residents, for a collaborative models of healthcare delivery.<sup>6</sup> The high degree of effectiveness of a 2-hour cardiac resuscitation/intravenous access simulation-based IPE was confirmed via various quantitative questions abstracted from an interdisciplinary education perception scale (IEPS) survey completed immediate after the participants had finished their training.<sup>6</sup> Using multidisciplinary simulation-based crisis scenarios, a good training efficiency was obtained in relation to the technical and non-technical safety skills required by surgical teams and this was confirmed by post-course trainee and trainer assessments.<sup>7</sup> Another high-fidelity, simulation-based, 3-hour interdisciplinary operating room IPE was found to improve significantly the trainees' post-session self-assessed teamwork competences scores compared to their pre-session scores.<sup>8</sup> Single point 5 semi-urgent situations simulation-based IPE was found to significantly improve the “patient safety and teamwork” skills of pharmacy student's.<sup>9</sup> This study's findings were confirmed in term of the effectiveness of simulation-based IPE by comparing pre- and post-scores obtained using a “team building and interprofessional communication survey tool” , the latter scores being obtained immediately after the participants had completed training.<sup>9</sup>

In another study, extensive IPC training was given to professionals covering the core elements related to caring tracheostomy patients with speaking valves.<sup>10</sup> The participants in this study by Estis *et al.* suggested that pre-simulation training and more structural interaction during the debriefing phase were likely to enhance

1  
2  
3 effective of the IPE.<sup>10</sup> The Watters et al. study partially solve above mentioned  
4 limitation by implementing Diamond, following description-analysis-application steps,  
5 interactive debriefing, during a 1-day simulation course.<sup>11</sup> Significantly, this strategy  
6 was found to increase the “communication and teamwork” skills of the professional  
7 participant's as assessed by comparing pre-course self-assessments with  
8 post-self-assessments.<sup>11</sup> The unsolve problems associated with the results of Watters  
9 et al. study include a lack of follow-up assessment that examines the transference and  
10 sustainability of the learned IPC skills over time and a lack of opportunity to ask the  
11 participant to reflect back on the training after a period of time, which would allow  
12 the clinical implications of IPC training to be examined.

13  
14  
15  
16  
17  
18 Taken together, previous simulation-based IPE studies<sup>6-11</sup> have lacked  
19 pre-simulating and/or post-course continuous training; in addition, there is an absence  
20 of long-term follow-up that allows the transference and sustainability of IPC practice  
21 to be assessed. Furthermore, there is an absence in these studies of opportunities for  
22 the participants to reflect on their training after a period of clinical IPC practice. In  
23 other words, the effectiveness of the previous single-point simulated-enhanced IPE  
24 studies was assessed immediately after the training session rather than there being a  
25 sequential follow-up over time. As a result, it has become important to develop  
26 feasible continuous IPE and IPC strategies that allow self-reflection through  
27 benchmarking-sharing during the monitoring of newly trained health professionals.  
28 When trying to improve each health professional's IPC attitude, in order to save  
29 resource, including the time needed to carry out the training etc., the number of  
30 faculty members needed to run the training and the facilities needed for the training,  
31 each newly trained participant acted as a seed instructor within their team, which  
32 resulted in profession-wide IPC promotion and attitude remodeling.

33  
34  
35  
36  
37  
38 In 2014, a random sampling survey of three professions at our institution  
39 revealed that the IPC attitudes of physician, nurses and pharmacists need to be  
40 improved (fig. 1). Accordingly, the education committee targeted these three  
41 professions and organized the development of a simulation-enhanced IPE plus  
42 Diamond debriefing intervention; this include stepwise pre-simulation training,  
43 post-course continuous training, and immediate plus delay IPC attitude assessments.  
44 Additionally, an e-learning platform, together with post-training  
45 benchmarking-sharing, was also included in order to examine the participants'  
46 self-reflection. Intentionally, this pilot intervention was implemented in such a way as  
47 to include all three of the above mentioned professions; this allowed these new health  
48 professionals to be involved in cultivated IPC within their team as seed IPC instructor.  
49  
50  
51  
52  
53  
54  
55  
56  
57  
58  
59  
60

## METHODS

### Participants and setting

Health professionals having longer than 1-year but less than 4-years clinical work experience were invited to participate this study (figure 1). The voluntary participants (n=94) were invited to join the 2015 preliminary simulation-enhanced IPE courses to improve their IPC attitude. After excluding six participants due to incomplete questionnaires, a final total of n=88 individuals were included in this study. They consisted of physician (n=34), nurse (n=30) and pharmacists (n=24). After a brief introduction to the intensive simulation-enhanced IPE courses, at the beginning of intervention, the participants were asked to complete the pre-course (T<sub>1</sub>) on-line IPC attitude assessment that consisted of interdisciplinary education perception scale (IEPS) and the Attitudes Toward Health Care Teams Scale (ATHCTS) (supplement table 1-2). Each on-line self-assessment was numbered so that participants remained anonymous but their numbers could be used to match their pre-course (T<sub>1</sub>) self-assessment with post-course (T<sub>2</sub>) and end-of-study (T<sub>3</sub>) self-assessment (figure 1). All participants continued with their usual professional clinical routine throughout the 3-month interventional study.

Taipei Veterans General Hospital (TVGH) is a 3000-bed medical center providing primary and tertiary care to active-duty and retired military personnel and their dependent; in addition TVGH is the teaching hospital for several medical universities in Northern Taiwan. Between January 2015 and May 2016, we conducted a prospective cross-sectional comparative study at the high-fidelity clinical simulation and interactive learning centre of TVGH; this centre trains around 2500 staff each year. Ethical approval was obtained from the Ethics committee of our institution and care was taken to apply the World Medical Association Declaration of Helsinki principles to the research.

### Simulation-enhanced IPE courses

Each enrolled participant attended a 3.5-hour preparation workshop (T<sub>1</sub>) at the beginning of this study (first month). Subsequently, a 3.5-hour simulation workshop was arranged for the participants during the second month (T<sub>2</sub>). At the end of this 3.5-hour simulation workshop, the participants drew lots to decide whether they were to be members of group 1 (Gr. 1), who needed to prepare for post-course benchmarking-sharing during the third months (T<sub>3</sub>) after entering the study. In order to keep the fix ratio (34:30:24) among the three professions, half of the physicians, nurses and pharmacists were selected by lot to prepare for benchmarking-sharing. In other words, there were 17 physicians, 15 nurses and 12 pharmacists in group 1 and a similar number in group 2 (figure 1). All instructors, whose involving in this IPE



1  
2  
3 intervention program, attended serial training sessions that included extensive training  
4 in how to use the Diamond DAA debriefing strategy to facilitate participants and how  
5 to assess the transference and sustainability of the trained “coordination,  
6 communication, teamwork, and leadership” skills regarding IPC by participants.  
7  
8

9 *7-hour preparation and simulation workshop*

10 *-Preparation workshop (T<sub>1</sub>).* Two workshops (n=44 in each room), each with a  
11 fixed ratio (17:15:12) of physician, nurse and pharmacists, were held as two sessions  
12 in two consecutive days. The initial 3.5-hour workshop included a lecture (1-hour),  
13 IPE-specific video watching (0.5-hour, three 10-minute clips), post-video watching  
14 small group discussion (0.5-hour), and instructor-facilitated discussion with all  
15 participants (1.5-hour). These three clips consisted of simulated examples of  
16 IPC-based care. They were firstly, a simulation of a distracted wife and a 61-year-old  
17 dyspnea male who suffered from recurrent asthmatic attacks due to inappropriate  
18 home medication, secondly, a simulation of a 35-year-old anxious family including a  
19 pregnant nausea/vomiting/abdominal pain female who need the selection of suitable  
20 antiemetics and a pediatrics/gynaecology consultation in an ER setting and, finally, a  
21 simulation of a 57-year-old chest pain male with a distracted son who had the wrong  
22 allergy and ID labeling on his arm band, as well as unlocked bed in ICU setting.  
23 These 10-minutes clips provided a basis for post-video watching discussion that were  
24 led by two inter-professional educators (1-hour); these target the role and value of the  
25 IPC healthcare team involved in patient care. Importantly, the instructor-facilitated  
26 discussion was followed a Diamond D-A-A debriefing for IPC performance by all  
27 participants in relation to each profession involved in the simulated clinical scenarios  
28 presented in the three video. The “description” step involving ‘agreed description’ of  
29 the fact rather than emotion concerning video scenario, the more challenging  
30 “analysis” and “application” steps involving ‘how did participants feel about three  
31 video scenario?’ and “how participants may apply the learnt knowledge in their own  
32 clinical practice”.<sup>11,12</sup>  
33  
34  
35  
36  
37  
38  
39  
40  
41  
42  
43

44 *-simulation workshop (T<sub>2</sub>).* In our simulation centers, four small groups (n=22)  
45 with fixed ratio, either 9:7:6 or 8:8:6, of physician to nurse to pharmacists, were held  
46 as four sessions within in two consecutive days (figure 2). Using the clinical scenario  
47 outlined below, these workshops were facilitated by well-trained IPE instructors and  
48 faculty members from dietetics, social workers and respiratory therapists professions.  
49 A patient scenario involving Mr. Jason was developed collaboratively by the faculty  
50 members of the above mentioned professions. Participants were given the following  
51 information. Mr. Jason has a history of chronic obstructive pulmonary disease  
52 (COPD), smokes 60 packs per year of cigarettes and has hypertension, diabetes,  
53 coronary artery disease and atrial fibrillation. He has been admitted for acute  
54  
55  
56  
57  
58  
59  
60

1  
2  
3 exacerbation of his COPD five times in the past one year. Home medication includes  
4 aspirin, a calcium channel blocker, mycolytic agents, inhalation  
5 corticosteroid/bronchodilator and subcutaneous administrated insulin. Mr. Jason was  
6 admitted 3 weeks ago for emergent coronary artery bypass grafting surgery. Although  
7 there has been aggressive management with regular chest percussion, he had had  
8 difficulty being weaned from a ventilator due to poor sputum expectation and  
9 malnutrition. The primary care teams are now considering a tracheostomy and  
10 intensive chest/nutrition therapy. His family members are at the bedside. During the  
11 simulation, a pre-set intubated high-fidelity SimMan® 3G simulator acted as the  
12 patient and standardized patients (SPs) were used as his family.  
13  
14

15  
16  
17  
18 In this 3.5-hour workshop, there were six key phases; these were the first  
19 simulation (30 min.), the first debriefing (40 min.), the second simulation (30 min.),  
20 the second debriefing (40 min.), the third simulation (20 min.), and the final  
21 debriefing/ending (50 min.). Randomly, a fixed ratio (3:2:2, 3:2:2, or 3:3:2) of  
22 physician: nurse and: pharmacists participated in the three simulations phases and  
23 Diamond debriefing phases based on a procedure involving a Description (D),  
24 Analysis (A) and Application (A) structure, as in the debriefing phase of preparation  
25 workshop. These were carried out by the three professions alternatively (fig. 2).<sup>11,12</sup>  
26 Before the beginning of the simulation, the participants were presented with above  
27 mentioned case's name, age, gender, admission diagnosis and current  
28 medication/management. In the three simulation phases, the participants involved  
29 were expected to carry out assessment (1st simulation), treatments (2<sup>nd</sup> simulation),  
30 and general care (3<sup>rd</sup> simulation) of the patients, collaboratively. Then, the participants  
31 began the post-simulation debriefing phase and reflected on the challenges, pitfalls,  
32 and successes that occurred within the simulation.  
33  
34  
35  
36  
37  
38

39  
40 *The IPC benchmarking-sharing (T<sub>3</sub>) of the Group 1 participants.* As mentioned  
41 above, 17 physicians, 15 nurses and 12 pharmacists formed group 1 and these  
42 participants underwent benchmarking-sharing. Randomly, four small groups (n=11)  
43 with ratio (4:4:3, 4:4:3, 4:4:3 and 5:3:3) of physician to nurse to pharmacists were  
44 presented as four sessions in two consecutive days. During benchmarking-sharing, the  
45 transference and sustainability of each participant's learned “coordination,  
46 communication, teamwork, and leadership” skills IPC regarding over time were rated  
47 by the same well-trained IPE instructors of the preparation and simulation workshops.  
48 Presenters were asked to give their examples of beside IPE/IPC in order to assess the  
49 transference and sustainability of their learned IPC skills. In total, 4 hours (240  
50 minutes) were needed for 11 presenters to complete their 20-minutes  
51 presentation/discussion in each session. The whole presentation process of each  
52 individual was recorded as a video by teaching assistants (TAs) to help with  
53  
54  
55  
56  
57  
58  
59  
60

1  
2  
3 continuous IPC promotion. With the agreement of presenters, the TAs uploaded edited  
4 versions of the video to the e-learning platform. The Group 2 participants were asked  
5 to join this end-of-study (T<sub>3</sub>) benchmarking-sharing.  
6

7  
8 *-e-learning platform.* Both the group 1 and the group 2 participants were invited  
9 to use a common IPE e-learning platform containing the above mentioned scenario,  
10 various power points presentations, the video used in preparation/simulation  
11 workshop and the video from the benchmarking-sharing. The aim being freely to  
12 encourage self-directed learning.  
13  
14

### 15 16 **IPC attitudes measurements**

- 17  
18 ● *Interdisciplinary education perception scale (IEPS):* To measure the participants'  
19 attitudes towards IPC, we used the IEPS. This is a 18-items scale that uses 6  
20 Likert point measures ranging from “strongly disagree (1 point) to strongly agree  
21 (6 point)”<sup>13,14</sup> Each of the 18 IEPS items has been classified into four subscales  
22 that add up to the values of the individual items of the corresponding factor.  
23 Subscale 1, labeled as “Competency and Autonomy” (items 1, 3, 4, 5, 7, 9, 10  
24 and 13; minimum score: 8; maximum score: 40), measures how highly students  
25 respect their profession, in the sense that it is well taught and contributes  
26 significantly to improving the healthcare field, as well as to what extent they  
27 believe that other professions are respected in a similar fashion. Subscale 2,  
28 “Perceived Need for Cooperation” (items 6 and 8; minimum score: 2; maximum  
29 score: 10), reflects the responders' perceptions of the need for teamwork, which  
30 typically includes respecting and working well with other professions. Subscale  
31 3, “Perception of Actual Cooperation” (items 2, 14, 15, 16 and 17; minimum  
32 score: 5; maximum score: 25), aims to reveal the responders' perception of how  
33 their profession typically respects and works well with other professions.  
34 Subscale 4, “Understanding Others' Values” (items 11, 12 and 18; minimum  
35 score: 3; maximum score: 15), aims to reflect the degree of respect the responder  
36 has for contributions from all healthcare professions.<sup>14,15</sup>  
37
- 38 ● *Attitudes Toward Health Care Teams Scale (ATHCTS):* The original ATHCTS is  
39 a 20-item tool that consists of quality of care/process (14 items) and physician  
40 centrality (6 items) subscales' this use a 5-point scale.<sup>16</sup> In our study, only the  
41 14-item that form the quality of care/process assessment was used to measure the  
42 self-efficiency. The quality of care/process subscale measures the perceptions of  
43 team members regarding the quality of care delivered by health care teams and  
44 the quality of teamwork needed to accomplish this. In fact, there are three  
45 components, these are “quality of care delivery”; “patient-centered care” and  
46  
47  
48  
49  
50  
51  
52  
53  
54  
55  
56  
57  
58  
59  
60

1  
2  
3 “team efficiency” within the quality of care/process subscale. A higher ATHCTS  
4 scores represents more positive attitudes toward teamwork.  
5

- 6 ● *Open-ended items*: participants were asked freely to provide qualitative feedback  
7 by answering question “*what is the one thing you are going to take away with*  
8 *you at the end of this course?*” in the online post-courses self assessment (T<sub>3</sub>).  
9 This question was designed to prompt a participant to reflect on their own  
10 learning during the course and allowed us to gather evidence on which elements  
11 within the courses seemed to be contributing the most to the learning experience.  
12
- 13 ● *Pre-intervention and Post-intervention random sampling survey of IPC attitudes*  
14 (figure 1): Across the three professions, namely physicians, nurses and  
15 pharmacists, the effectiveness of the well-trained seed instructors in terms of  
16 team IPC promotion and IPC attitude modification was followed up during the  
17 6<sup>th</sup> month after beginning of the intervention program (T<sub>post</sub>). The same questions,  
18 namely (1) Are you familiar with IPC skills? (2) Do you think that IPC helps you  
19 to understand the role of other healthcare team members? (3) Do you think that  
20 IPC improves patient care quality? (4) Do you think that IPC improves patient  
21 centered care? (5) Do you think that IPC improves team efficiency?. There are  
22 five Likert scale responses ranging from 1, strongly disagree to 5, strongly agree.  
23 In total 132 valid post-intervention questionnaires were collected for comparison  
24 with another 132 valid-pre-intervention questionnaires. These anonymous  
25 pre-intervention and post-intervention questionnaires were completed by random  
26 members sampled from the three professions, namely 51 physicians, 45 nurses  
27 and 36 pharmacists twice. In other words, the individuals who responded to the  
28 online IPC attitude survey might be but are not necessarily different between  
29 pre-intervention and post-intervention survey. However, it is important to note  
30 that the enrolled participants in our interventional study were excluded from the  
31 sampling pool for post-intervention sampling survey.  
32  
33  
34  
35  
36  
37  
38  
39  
40  
41  
42  
43

#### 44 **Statistical analysis**

45 Since the IEPS and ATHCTS items are ordinal in nature, Wilcoxon's signed rank  
46 test was used to analyze each item. The means of the overall IEPS score and the four  
47 subscales were evaluated with the Student's two-tailed paired *t*-test for continuous  
48 measures, with the aim of detecting any differences between before and after training.  
49 Data from the IEPS and ATHCTS were matched by profession for analysis.  
50  
51  
52  
53  
54  
55  
56  
57  
58  
59  
60

## RESULTS

The baseline characteristics of the participants, including mean age, gender and clinical experiences, were similar across the physicians, nurses and pharmacist as can be seen in table 1. Notably, a greater number of nurses and pharmacists compared to the physicians had previously experienced IPE and had taken part in more workplace IPC meeting.

The baseline IPC attitude, pre-course ( $T_1$ ) IEPS scores and pre-course ( $T_1$ ) ATHCTS scores were also similar across the physicians, nurses and pharmacist (table 2). Compared to nurses, there were lower scores for the “competency and autonomy” and “understanding others values” basal IEPS subscales ( $T_1$ ) among the physicians. Similarly, also compared to nurses, there were lower scores for the “competency and autonomy” and “perception of actual cooperation” basal IEPS subscales ( $T_1$ ) among the pharmacists. Notably, the “competency and autonomy” subscale of IEPS score and the “team efficiency” subscale of the ATHCTS score ( $T_2-T_1$ ) were increased by the 7-hour stepwise simulation-enhanced IPE course across all three categories, physicians, nurses and pharmacists and, especially, the magnitude of increase in IEPS and ATHCTS scores were significantly greater among the nurses and pharmacist than the physicians (table 2). Obviously, pharmacists had the highest increase in percent change of post-courses ( $T_2$ ) ATHCTS score from pre-courses ( $T_1$ ) score than those in nurses and physicians (table 2).

Based on the benchmarking-sharing presentations of group 1 participants, the instructors found that the transference and sustainability of the “coordination” and “leadership” skills regarding IPC were higher among physicians than nurses (table 3). Furthermore, the instructors assessed that the transference and sustainability of the “communication” and “teamwork” skills regarding IPC were higher among the pharmacists than the physicians (table 3). Finally, a greater trend indicating better transference and sustainability of the “communication” and “teamwork” skills regarding IPC was observed among the nurses than the physicians (table 3).

Previous studies had suggested that training videos consistently enhance the observational powers of trainees, as well as improving their ability to integrate different information and increasing their motivation to learn.<sup>20,21</sup> In response in open-ended questions at the end of our study, most participants reported that watching the IPE-specific video and discussing it, as well as viewing the uploaded videos on the e-learning platform, markedly encourage their motivation to improve their IPC attitude. Specifically, the participant’s responses indicated that the availability of an IPE/IPC-specific e-learning platform was able to continuously improve the users' IPC attitude by providing useful resource and instruction.

Some interesting comments from the participants are listed as below:

1  
2  
3 “we are all geared to patient-centered care, all professions need to use their best  
4 assessment and judgment to evaluate patients in order to provide the best patient care  
5 that we can..... ”;

6  
7 “...there is a lot of team work going on our institution”;

8  
9 “...all professions should be encouraged within their training program to become  
10 independent in order to make IPC work better..”;

11  
12 “...there are differences in language and discipline across different professions,  
13 but the similarities are core elements of IPE, including coordination,  
14 communication, teamwork and leadership skills...”;

15  
16 “the future of health care is teamwork, so being able to work with one another,  
17 our scopes of practice mesh together.”;

18  
19 “There are situations that are different, but we do have to rely on the expertise of  
20 other professionals' in order to obtain the best outcome for the patient”;

21  
22 “we were able to collaborate very well with other professional health care  
23 members, especially with the nurses in their second simulation; they sort of  
24 referred to us regarding our drug management skills and sort of learned how  
25 important pharmacists can actually be in a hospital setting.”;

26  
27 And “sometime staying in your own profession is great and everything, but you  
28 really sort of need to reach outwards and see what other professions have to offer,  
29 because only if you do that can you truly use the entire knowledge base of other  
30 profession and provide the best patient care.”

31  
32 Compared to pre-courses ( $T_1$ ) scores, the degree of increase in total IEPS and  
33 ATHCTS scores at post-courses ( $T_2$ ) self assessments were not different between  
34 group 1 and 2 participants (data not shown). Among the group 1 and 2 participants,  
35 the sustainability of the effectiveness of 7-hour stepwise simulation-enhanced IPE  
36 was confirmed by the fact that there were similar or higher end-of-study ( $T_3$ ) IEPS  
37 and ATHCTS scores than post-courses ( $T_2$ ) scores (figure 3). From the post-course ( $T_2$ )  
38 to end-of-study ( $T_3$ ) period, a significantly greater increase in the total IEPS and  
39 ATHCTS scores of the group 1 participants than the group 2 participants can be seen  
40 (figure 3). This indicates that the benchmarking-sharing helps to improve the group 1  
41 participant's IPC attitude. Among the group 1 participants, the most improved items  
42 were the “competency and autonomy” and “perception of actual cooperation”  
43 subscales of the IEPS and the “quality of care delivery” and “team efficiency”  
44 subscales of the ATHCTS when the  $T_2$  and  $T_3$  self-assessments were compared.

45  
46 Inappropriate attitudes to IPC were initially present among many of the  
47 randomly sampled team members; this finding was observed from all three  
48 professions, physicians, nurses and pharmacists via the pre-intervention survey ( $T_{pre}$ )  
49 (figure 3C). The aim of the interventional training program was to develop the team  
50  
51  
52  
53  
54  
55  
56  
57  
58  
59  
60

1  
2  
3 member volunteers via this interventional program as seed instructors after they had  
4 taken part in the three months of the program. In this context, after the stepwise  
5 sequential simulation-based IPE courses had taken place, the post-intervention ( $T_{\text{post}}$ ,  
6 6<sup>th</sup> month) survey revealed that there was significant improvement in randomly  
7 sampled team member's IPC attitude (figure 3B) across physicians, nurses and  
8 pharmacists. Overall, after seed instructors began promoting IPC in the institution,  
9 these responders (n=132) now strongly agreed with the following; that they were  
10 familiar with IPC skills, that IPC helped with understanding the role of other team  
11 members, that IPC improved patient care quality and that IPC improved team  
12 efficiency. Notwithstanding the above findings, the randomly sampled team members  
13 across the three professions agreed both pre-intervention and post-intervention that  
14 IPC improves patient-centered care.  
15  
16  
17  
18  
19  
20  
21  
22  
23  
24  
25  
26  
27  
28  
29  
30  
31  
32  
33  
34  
35  
36  
37  
38  
39  
40  
41  
42  
43  
44  
45  
46  
47  
48  
49  
50  
51  
52  
53  
54  
55  
56  
57  
58  
59  
60

## DISCUSSION

Previous studies reported that simulation team training significantly improved participant's teamwork skills.<sup>6,8,9,17-19</sup> Integrated simulators, also known as human patient simulators (HPS), help suspend disbelief during a simulation due to the integrated computer technology that is housed in the mannequin; these systems allow the mannequin to respond in real time to specific care interventions and treatments. The formal reflective stage in the simulation learning process is the "debriefing". Debriefing follows the actual simulation and serves to help learners clarify and integrate the simulation experience with their previous knowledge. When debriefing is skillfully facilitated using a positive and constructive method, the learning advances to clinical transference, the final step in the simulation learning pyramid.

The Diamond debriefing method encourages a standardized approach to high-quality debriefing across courses, which benefits both the participants and the involved faculty members.<sup>12</sup> The Diamond DAA debriefing method is related to various aspects of the advocacy-inquiry approach and of debriefing with good judgment. It is specifically designed to allow an exploration of the non-technical aspects of a simulated scenario. The Diamond is a two-sided prompt sheet: the first contains the scaffolding, with a series of specifically constructed questions for each phase of the debriefing; while the second lays out the theory behind the questions and the process. The Diamond encourages a standardized approach for high-quality debriefing on non-technical skills.<sup>12</sup> The Diamond provides an easy but pedagogically sound structure to follow and also makes available specific prompts to use in an appropriate moment. During our study, the facilitators-led post-video watching discussion phase of the preparation workshop and in the post-simulation debriefing phases of simulation workshop, the participants from three professions took turns to be responsible for the DAA-based group reflection. This well-organized design allows each participant from three professions to have equal IPE exposure, which helps their development as seed instructors in their healthcare team. Our study provided good evidence as to the effectiveness of using "diamond debriefing method" during the simulation-enhanced IPE course.

The strengths of our study are firstly the Kirkpatrick 1-4 levels-based design<sup>22</sup> used to evaluate the effectiveness of the stepwise simulation-based IPE intervention regarding improvements in participants as seed instructors. Kirkpatrick's first and second levels evaluate "participants satisfaction" and "participants increase confidence, knowledge and performance". For these two levels we used the post-courses (T<sub>2</sub>) self assessed-IEPS and ATHCTS scores, which assess IPC attitude"; these results showed, significant improvements compared to the pre-courses scores (T<sub>1</sub>) across all three professions, physicians, nurses and pharmacists. Kirkpatrick's



1  
2  
3 third level evaluates “the amount of knowledge and skills learned that participants  
4 actually use in everyday work”. In our study, this level was evaluated by the  
5 instructors and assessed the transference and sustainability of the learnt IPC skills  
6 using the group 1 participants' presentation. In parallel, the  
7 post-benchmarking-sharing (T<sub>3</sub>) self-assessed IPC attitude scores, using IEPS and  
8 ATHCTS, represents the group 1 and group 2 participants' Kirkpatrick's level 3  
9 outcomes. Kirkpatrick's fourth level evaluates “Did the implementation of the  
10 interventional training program impact the healthcare system?”. Promisingly, the  
11 post-intervention random sampling survey (T<sub>post</sub>) in our study across three professions  
12 was focused on revealed that there had been a general improvement in their team  
13 members' IPC attitudes. In other words, our pilot interventional program has already  
14 reached, at least partly, the Kirkpatrick's fourth level goal.

15  
16  
17  
18  
19  
20  
21 There are some limitations to our study. Our IPE approach targets IPC attitude  
22 specifically using a number of defined types of patient scenario that are suitable for all  
23 three of the enrolled professions. Nonetheless, the specific IPC skills required for  
24 holistic care of COPD cases are obviously different from those need to care for acute  
25 renal failure cases. Undoubtedly, IPC skills are learned more readily when the  
26 simulation-enhanced IPE used is more specific to relevant type of clinical situation. In  
27 our study, this limitation was alleviated by the multi-professional post-simulation  
28 DAA debriefing during a 3.5-hour simulation workshop and the fact that the enrolled  
29 participants continued to carry out their regular clinical routines during the 3-month  
30 intervention period. In other words, our enrolled participants were likely to interacting  
31 with other professions in their clinical routine after the first and second stimuli  
32 presented during the preparation and simulation workshops. In fact, it has been  
33 suggested that the participants who have learnt IPC skills in a variety of simulation  
34 modules will be able to synthesize a higher level of IPC abilities that can then be  
35 applied across many clinical situations. In terms of continuity, the availability of an  
36 e-learning platform that has sufficient IPE resources will help the participants to  
37 continue with self-directed learning freely. Finally, the benchmarking-sharing  
38 provides the enrolled participants with the opportunity for IPC self-reflection, as well  
39 as enhancing their motivation as seed instructors in their teams.

40  
41  
42  
43  
44  
45  
46  
47  
48  
49  
50  
51  
52  
53  
54  
55  
56  
57  
58  
59  
60  
As participation in this course was voluntary, participants were likely to be  
more highly motivated to engage in collaboration than other professionals in the  
general hospital population. This limits the generalizability of our results. Moreover,  
we did not include a control group, leaving the study vulnerable to confounding  
factors such as history and the Hawthorne effect.<sup>23</sup> Both IEPS and ATHCTS have  
been suggested as methods of determining the effect of practice-based IPE  
educational interventions among health care students and clinicians.<sup>13,14,16</sup> Tests

1  
2  
3 assessing the reliability and validity of these approaches have demonstrate that each  
4 subscale of IEPS and ATHCTS is a strong measure of its respective underlying IPC  
5 concept that are crucial to students and residents in these medical and health  
6 professions.<sup>13,14,16</sup> So, in this study, we used in our IPE interventional programs a  
7 series of well validated instruments with good psychometric properties to decrease  
8 potential interference due to the above mentioned confounding factors.  
9

## 10 11 **CONCLUSIONS**

12 This multidimensional interventional simulation-based IPE program was able to  
13 successfully train voluntary participants as seed instructors that in turn allowed them  
14 to modify the IPC attitude of their team members. This is a pilot promising study that  
15 should be considered in the future for extension to professions other than the three  
16 enrolled professions here. Ultimately, good IPE/IPC training is important to  
17 improving IPC within the healthcare teams and to ensuring high-quality patient care.  
18  
19  
20  
21  
22  
23  
24  
25  
26  
27  
28  
29  
30  
31  
32  
33  
34  
35  
36  
37  
38  
39  
40  
41  
42  
43  
44  
45  
46  
47  
48  
49  
50  
51  
52  
53  
54  
55  
56  
57  
58  
59  
60

1  
2  
3  
4 **Acknowledgements** The authors express their gratitude to all members of the General  
5  
6 Medicine Teaching Demonstration Center for their input for this article. We also  
7  
8 gratefully appreciate professor Ralph Kirby help us to correct the English writing of  
9  
10 our manuscript.

11  
12 **Funding** This work was supported by the government Ministry of Health and  
13  
14 Welfare and Taiwan Association of Medical Education (TAME) and V105EA-005 of  
15  
16 TVGH from the Taipei Veterans General Hospital, Taipei, Taiwan.

17  
18  
19 **Contributors** All authors actively participated in analysis of the research results.  
20  
21 YYY, FYL, JFL were responsible for study design. YYY, FYL, LYY, CCH  
22  
23 participated in the questionnaires. YYY, CCH, HMC, FYL participated in the creation  
24  
25 and management of the database. YYY, FYL, SYK, CCH were responsible for the  
26  
27 statistical analysis and writing of the manuscript.

28  
29  
30 **Competing interests** None.  
31  
32  
33  
34  
35  
36  
37  
38  
39  
40  
41  
42  
43  
44  
45  
46  
47  
48  
49  
50  
51  
52  
53  
54  
55  
56  
57  
58  
59  
60

## FIGURES AND LEGENDS

**Figure 1** Study flow chart.

**Figure 2** Protocols for small group (n=22) simulation-enhanced IPE workshops in each sessions within two consecutive days.

**Figure 3** The comparison of sequential changes of post-course ( $T_2$ ) and end-of-study ( $T_3$ ) subscales and scales of IEPS (A) and ATHCTS (B) between group 1 and group 2 participants. (C). Comparison of responses from 132 randomly sampled members from the three professions (51 physicians, 45 nurses, 36 pharmacists twice) about IPC's attitudes in pre-intervention ( $T_{pre}$ ) and post-intervention ( $T_{post}$ ) survey. IPC attitude was assessed by five Likert scale responses ranging from 1: strongly disagree to 5: strongly agree. \* $p < 0.01$  vs. post-course ( $T_2$ ) or pre-intervention ( $T_{pre}$ ) scores; # $p < 0.01$  vs. group 2 participants' scores.

## REFERENCES

1. Frenk J, Chen L, Bhutta ZA. Health professionals for a new century: transforming education to strengthen health systems in an interdependent world. *Lancet* 2010;376(9756):1923-58.
2. Pinar G. Simulation-enhanced interprofessional education in health care. *Creative Educ.* 2015;6:1852-9.
3. Deschodt M, Flamaing J, Haentjens P, *et al.* Impact of geriatric consultation teams on clinical outcome in acute hospitals: a systemic review and meta-analysis. *BMC Med* 2013;11:38.
4. Lapkin S, Levett-Jones T, Gilligan C. A systemic review of the effectiveness of interprofessional education in health professional programs. *Nurse Educ Today* 2013;33(2):90-102.
5. Interprofessional Education Collaborative Expert Panel. Core competencies for interprofessional collaborative practice: report of an expert panel. Washington, D.C.: Interprofessional Education Collaborative; 2001.
6. Baker C, Pulling C, McGraw R, *et al.* Simulation in interprofessional education for patient-centered collaborative care. *J Adv Nurs* 2008;64(4):372-9.
7. Undre S, Koutantji M, Sevdalis N, *et al.* Multidisciplinary crisis simulations: the way forward for training surgical teams. *World J Surg* 2007;31(9):1843-53.
8. Paige JT, Kozmenko V, Yang T, *et al.* High-fidelity, simulation-based, interdisciplinary operating room team training at the point of care. *Surgery* 2009;145(2):138-46.
9. Vyas D, McCulloh R, Dyer C, *et al.* An interprofessional course using human patient simulation to teach patient safety and teamwork skills. *Am J Pharm Educ* 2012;76(4):71.
10. Estis JM, Rudd AB, Pruitt B, Wright T. Interprofessional simulation-based education enhances student knowledge of health professional roles and care of patients with tracheostomies and Passy-Muir® Valves. *J Nurs Educ Practice* 2015;5(6):123.
11. Watters C, Reedy G, Ross A, *et al.* Does interprofessional simulation increase self-efficacy: a comparative study? *BMJ Open* 2015;5:e005472.
12. Jaye P, Thomas L, Reedy G. "The diamond": a structure for simulation debrief. *The Clinical Teacher.* 2015;12:171-175.
13. Byakika-Kibwika P, Kutesa A, Baingana R, *et al.* A situation analysis of inter-professional education and practice for ethics and professionalism training at Makerere University College and Health Sciences. *BMC Res Notes* 2015;8:598.

14. Luecht RM, Madsen MK, Taugher MP, *et al.* Assessing professional perceptions: design and validation of an Interdisciplinary Education Perception Scale. *J Allied Health* 1990;19(2):181–91.
15. Buelow J, McAdams R, Adams A, *et al.* Interdisciplinary teamwork: student differences and teaching implications. *Am J Health Sci* 2010;1(1):11–21.
16. Heinemann GD, Schmitt MH, Farrell MP, *et al.* Development of an Attitudes Toward Health Care Teams Scale. *Eval Health Prof* 1999;22(1):123–42.
17. Reese C, Jeffries PR, Engum SA. Learning together: using simulations to develop nursing and medical student collaboration. *Nurs Educ Perspect* 2011;31(1):33–37.
18. Robben S, Perry M, Nieuwenhuijzen L. van, *et al.* Impact of interprofessional education on collaboration attitudes, skills, and behavior among primary care professionals. *J Contin Educ Health Prof* 2012;32(3):196–204.
19. Oandasan I, Reeves S. Key elements of interprofessional education. Part 2: factors, processes and outcomes. *J Interprof Care* 2005;19(suppl 1): 39–48.
20. Chan LK, Patil NG, Chen JY, *et al.* Advantages of video trigger in problem-based learning. *Med Teach* 2010;32:760–5.
21. Balslev T, de Grave WS, Muijtjens AMM, *et al.* Comparison of text and video cases in a postgraduate problem-based learning format. *Med Educ* 2005;39(11):1086–92.
22. Salvatore VF. Evaluating training programs: The four levels, by Donald L. Kirkpatrick, Berrett-Koehler Publishers: *Am J Eval* 1998;19:259–61.
23. Reeves S, Perrier L, Goldman J, *et al.* Interprofessional education: effects on professional practice and healthcare outcomes (update). *Cochrance Database Syst Rev* 2013;3:CD002213.

1  
2  
3  
4  
5  
6  
7  
8  
9  
10  
11  
12  
13  
14  
15  
16  
17  
18  
19  
20  
21  
22  
23  
24  
25  
26  
27  
28  
29  
30  
31  
32  
33  
34  
35  
36  
37  
38  
39  
40  
41  
42  
43  
44  
45  
46  
47  
48  
49

| <b>Table 1 Characteristics of study population (n=88)</b>                                   |                          |                      |                           |
|---------------------------------------------------------------------------------------------|--------------------------|----------------------|---------------------------|
|                                                                                             | <b>Physicians (n=34)</b> | <b>Nurses (n=30)</b> | <b>Pharmacists (n=24)</b> |
| <b>Age (years)</b>                                                                          | 31.3± 2.7                | 29.1 ±4.8            | 30.5 ±3.6                 |
| <b>Female/male (No.)</b>                                                                    | 30/4                     | 27/3                 | 10/14                     |
| <b>Clinical work years</b>                                                                  |                          |                      |                           |
| <b>1-2/2-3/ 3-4 years (%)</b>                                                               | 76/14/10%                | 84/10/6%             | 69/20/11%                 |
| <b>Previous IPE training (yes/no)</b>                                                       | 15/85% <sup>#</sup>      | 35/65%               | 45/55%                    |
| <b>Frequency of participation of IPC meeting during the last 1-yr of clinical workplace</b> |                          |                      |                           |
| <b>High exposure (&gt;9 time)</b>                                                           | 14% <sup>#</sup>         | 36%                  | 43%                       |
| <b>Low exposure (&lt;3 times)</b>                                                           | 86% <sup>#</sup>         | 64%                  | 57%                       |

#p<0.01 vs. corresponding nurse's group; high exposure indicated participate more than 80% f monthly IPC meeting; low Exposure indicated joined less than 20% of monthly IPC meeting.

|                                                                                                                                 | Physicians (n=34)            |                               | Nurses (n=30)                |                               | Pharmacists (n=24)          |                               |
|---------------------------------------------------------------------------------------------------------------------------------|------------------------------|-------------------------------|------------------------------|-------------------------------|-----------------------------|-------------------------------|
|                                                                                                                                 | pre-course (T <sub>1</sub> ) | post-course (T <sub>2</sub> ) | pre-course (T <sub>1</sub> ) | post-course (T <sub>2</sub> ) | pre-course(T <sub>1</sub> ) | post-course (T <sub>2</sub> ) |
| <b>Total IEPS-18 scores [6-point scale]</b>                                                                                     | 56±1.8 <sup>#</sup>          | 76±9.8 <sup>*,#</sup>         | 65±1.6                       | 91±1.2                        | 64±8                        | 91±4.7 <sup>*,#</sup>         |
| percent change of total IEPS post-course (T <sub>2</sub> ) score from pre-course (T <sub>1</sub> ) score                        |                              | 18%                           |                              | 40% <sup>†</sup>              |                             | 42% <sup>†</sup>              |
| <b>IEPS subscales scores</b>                                                                                                    |                              |                               |                              |                               |                             |                               |
| Competency and autonomy (8 items)                                                                                               | 24±3.5 <sup>#</sup>          | 28±4.1 <sup>*,#</sup>         | 30±4.5                       | 39±7.2 <sup>*</sup>           | 22±5.4 <sup>#</sup>         | 40±6.1 <sup>*,#</sup>         |
| Perceived need for cooperation (2 items)                                                                                        | 7±2.2                        | 9±1.6                         | 8±2.9                        | 10±1.8                        | 9±3                         | 11±1.8                        |
| Perception of actual cooperation (5 items)                                                                                      | 17±2.7                       | 24±3.7 <sup>*,#</sup>         | 15±1.2                       | 26±4.3 <sup>*</sup>           | 20±4.8 <sup>#</sup>         | 23±2.5 <sup>#</sup>           |
| Understanding others values (3 items)                                                                                           | 8±2.4 <sup>#</sup>           | 15±2.9 <sup>*</sup>           | 12±3.8                       | 16±1.4                        | 13±2.1                      | 17±5.1 <sup>*</sup>           |
| <b>Total ATHCTS-14 [5-point scale]</b>                                                                                          | 39±2.3                       | 48±5.4 <sup>*</sup>           | 38±2.6                       | 51±4.6                        | 32±3.7 <sup>#</sup>         | 54±7.5 <sup>#</sup>           |
| percent change of total ATHCTS post-course (T <sub>2</sub> ) score from pre-course (T <sub>1</sub> ) score                      |                              | 23%                           |                              | 34% <sup>†</sup>              |                             | 69% <sup>†</sup>              |
| <b>ATHCTS subscales scores</b>                                                                                                  |                              |                               |                              |                               |                             |                               |
| Quality of care delivery (5 items)                                                                                              | 14±2.2                       | 15±1.8 <sup>#</sup>           | 13±1.6                       | 18±4.1 <sup>*</sup>           | 12±4.2                      | 20±2.0 <sup>*</sup>           |
| Patient-centered care (4 items)                                                                                                 | 13±1.7                       | 18±2.1 <sup>*</sup>           | 15±7.4                       | 19±3.3                        | 11±2.8 <sup>#</sup>         | 18±3.5 <sup>*</sup>           |
| Team efficiency (5 items)                                                                                                       | 12±1.1                       | 15±3.7 <sup>*</sup>           | 10±1.9                       | 14±2.7 <sup>*</sup>           | 9±2.6                       | 16±4.1 <sup>*</sup>           |
| * <i>p</i> <0.01 vs. pre-course scores; # <i>p</i> <0.01 vs. corresponding nurse scores; † <i>p</i> <0.01 vs. physicians scores |                              |                               |                              |                               |                             |                               |



1  
2  
3  
4  
5  
6  
7  
8  
9  
10  
11  
12  
13  
14  
15  
16  
17  
18  
19  
20  
21  
22  
23  
24  
25  
26  
27  
28  
29  
30  
31  
32  
33  
34  
35  
36  
37  
38  
39  
40  
41  
42  
43  
44  
45  
46  
47  
48  
49

**Table 3 Instructors-assessed transference and sustainability of the learnt IPE skills of group 1 participants by their benchmarking-sharing presentation.**

|                                                                                     | Physicians (n=17) | Nurses (n=15)         | Pharmacists (n=12)   |
|-------------------------------------------------------------------------------------|-------------------|-----------------------|----------------------|
| Participant appropriately transfer the “coordination” skills of IPC                 | 4.3±0.64          | 3.6±0.7 <sup>#</sup>  | 3.9±0.8              |
| Participant appropriately transfer the “communication” skills of IPC                | 3.9±0.52          | 4.1±0.94              | 4.4±0.7 <sup>#</sup> |
| Participant appropriately transfer the “teamwork” skills of IPC                     | 3.4±0.502         | 4.5±0.46 <sup>#</sup> | 4.1±0.9 <sup>#</sup> |
| Participant appropriately transfer the “leadership” skills of IPC                   | 4.4±0.803         | 3.4±0.61 <sup>#</sup> | 4.0±0.5              |
| Participant has good sustainability in practicing the “coordination” skills of IPC  | 4.6±0.54          | 3.3±0.21 <sup>#</sup> | 4.1±0.7 <sup>#</sup> |
| Participant has good sustainability in practicing the “communication” skills of IPC | 3.3±0.71          | 4.01±0.76             | 4.8±0.1 <sup>#</sup> |
| Participant has good sustainability in practicing the “teamwork” skills of IPC      | 3.8±0.2           | 4.7±0.1 <sup>#</sup>  | 4.5±0.6 <sup>#</sup> |
| Participant has good sustainability in practicing the “leadership” skills of IPC    | 4.7±0.4           | 3.0±0.3 <sup>#</sup>  | 3.8±0.4              |

5-point Likerts scale-based assessment; <sup>#</sup>p<0.01 vs. physician's group

Pre-view only

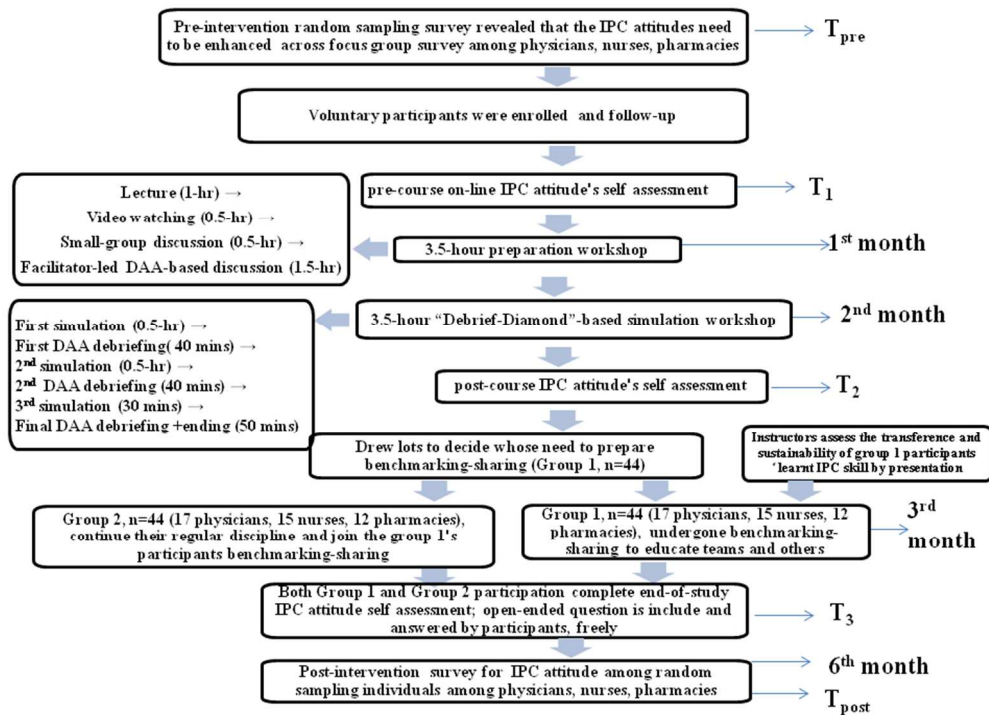

254x190mm (96 x 96 DPI)

ew only

Protocols for small group (n=22) simulation-enhanced IPE workshops as four sessions in two consecutive days

|               | physicians | nurses | pharmacists | mission                    | context                                                               |
|---------------|------------|--------|-------------|----------------------------|-----------------------------------------------------------------------|
| Combination-1 | n=3        | n=2    | n=2         | 1 <sup>st</sup> simulation | Physicians-led assessment of patient                                  |
| Combination-2 | n=3        | n=2    | n=2         | 1 <sup>st</sup> debriefing | D-A-A for 1 <sup>st</sup> simulation by three professions, separately |
| Combination-3 | n=3        | n=3    | n=2         | 2 <sup>nd</sup> simulation | Pharmacies-led treatment of patient                                   |
| Combination-1 | n=3        | n=2    | n=2         | 2 <sup>nd</sup> debriefing | D-A-A for 2 <sup>nd</sup> simulation by three professions, separately |
| Combination-2 | n=3        | n=2    | n=2         | 3 <sup>rd</sup> simulation | Nurses-led general care of patient and family                         |
| Combination-3 | n=3        | n=3    | n=2         | 3 <sup>rd</sup> debriefing | D-A-A for 3 <sup>rd</sup> simulation by three professions, separately |

D-A-A indicates description, analysis and application of peer's 1<sup>st</sup>, 2<sup>nd</sup> or 3<sup>rd</sup> simulation for future IPC

254x190mm (96 x 96 DPI)

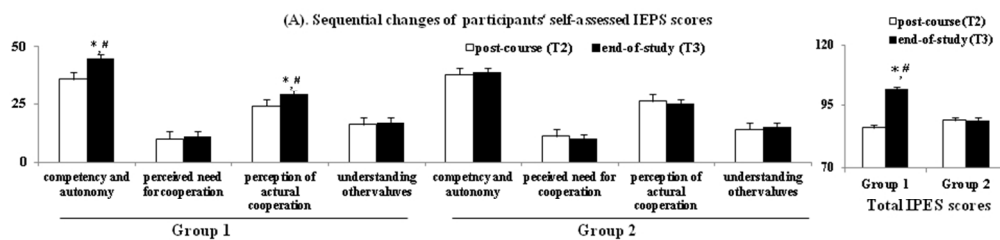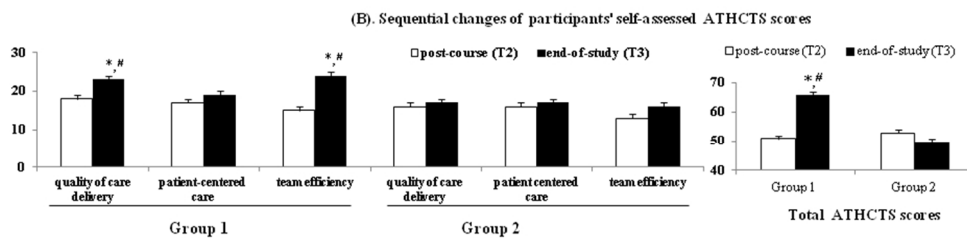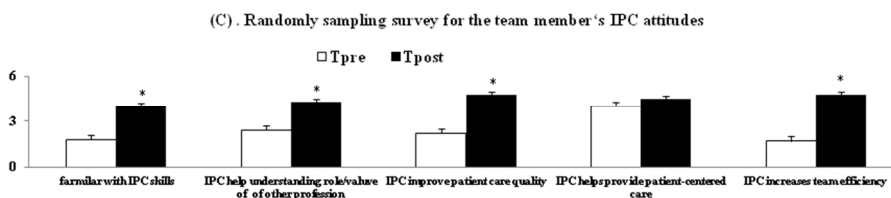

254x190mm (96 x 96 DPI)

ew only

1  
2  
3  
4  
5  
6  
7  
8  
9  
10  
11  
12  
13  
14  
15  
16  
17  
18  
19  
20  
21  
22  
23  
24  
25  
26  
27  
28  
29  
30  
31  
32  
33  
34  
35  
36  
37  
38  
39  
40  
41  
42  
43  
44  
45  
46  
47  
48  
49

| <b>Supplement table 1</b> Interdisciplinary education perception scale (IEPS)                                                                                                                                                            |                                                                                                                           |
|------------------------------------------------------------------------------------------------------------------------------------------------------------------------------------------------------------------------------------------|---------------------------------------------------------------------------------------------------------------------------|
| subclasses                                                                                                                                                                                                                               | statement                                                                                                                 |
| competency and autonomy (8 items)                                                                                                                                                                                                        | 1. Individuals in my profession are well-trained.                                                                         |
|                                                                                                                                                                                                                                          | 2. Individuals in my profession demonstrate a great deal of autonomy.                                                     |
|                                                                                                                                                                                                                                          | 3. Individuals in my profession are very positive about their goals and objectives.                                       |
|                                                                                                                                                                                                                                          | 4. Individuals in my profession are very positive about their contributions and accomplishments.                          |
|                                                                                                                                                                                                                                          | 5. Individuals in my profession trust each other’s professional judgment.                                                 |
|                                                                                                                                                                                                                                          | 6. Individuals in my profession are extremely competent.                                                                  |
|                                                                                                                                                                                                                                          | 7. Individuals in other professions respect the work done by my profession.                                               |
|                                                                                                                                                                                                                                          | 8. Individuals in other professions think highly of my profession.                                                        |
| perceived need for cooperation (2 items)                                                                                                                                                                                                 | 9. Individuals in my profession need to cooperate with other professions.                                                 |
|                                                                                                                                                                                                                                          | 10. Individuals in my profession must depend upon the work of people in other professions.                                |
| perception of actual cooperation (5 items)                                                                                                                                                                                               | 11. Individuals in my profession are able to work closely with individuals in other professions.                          |
|                                                                                                                                                                                                                                          | 12. Individuals in my profession are willing to share information and resources with other professionals.                 |
|                                                                                                                                                                                                                                          | 13. Individuals in my profession have good relations with people in other professions.                                    |
|                                                                                                                                                                                                                                          | 14. Individuals in my profession think highly of other related professions.                                               |
|                                                                                                                                                                                                                                          | 15. Individuals in my profession work well with each other.                                                               |
| understanding others value (3 items)                                                                                                                                                                                                     | 16. Individuals in my profession have a higher status than individuals in other professions.                              |
|                                                                                                                                                                                                                                          | 17. Individuals in my profession make every effort to understand the capabilities and contributions of other professions. |
|                                                                                                                                                                                                                                          | 18. Individuals in other professions often seek the advice of people in my profession.                                    |
| Likert's Scale with 6 possible responses (1=Strongly Disagree, 2=Moderately Disagree, 3=Somewhat Disagree, 4=Somewhat Agree, 5=Moderately Agree, 6=Strongly Agree ); ** Higher scores represent more positive attitudes toward teamwork. |                                                                                                                           |

only

1  
2  
3  
4  
5  
6  
7  
8  
9  
10  
11  
12  
13  
14  
15  
16  
17  
18  
19  
20  
21  
22  
23  
24  
25  
26  
27  
28  
29  
30  
31  
32  
33  
34  
35  
36  
37  
38  
39  
40  
41  
42  
43  
44  
45  
46  
47  
48  
49

| <b>Supplement table 2</b> Attitudes Toward Interprofessional Health Care Teams Scale (ATIHCTS)                                                               |                                                                                                                                                                                                                                                                                                                                                                                                                                                                                                                                                                                     |
|--------------------------------------------------------------------------------------------------------------------------------------------------------------|-------------------------------------------------------------------------------------------------------------------------------------------------------------------------------------------------------------------------------------------------------------------------------------------------------------------------------------------------------------------------------------------------------------------------------------------------------------------------------------------------------------------------------------------------------------------------------------|
| Subscales                                                                                                                                                    | STATEMENT                                                                                                                                                                                                                                                                                                                                                                                                                                                                                                                                                                           |
| quality of care delivery<br>(5 items)                                                                                                                        | 1. Developing an interprofessional patient care plan is excessively time consuming.<br>2. The give and take among team members helps them make better patient care decisions.<br>3. The interprofessional approach makes the delivery of care more efficient.<br>4. Developing a patient care plan with other team members avoids errors in delivering care.<br>5. The interprofessional approach improves the quality of care to patients                                                                                                                                          |
| patient-centered care<br>(4 items)                                                                                                                           | 6. Patients receiving interprofessional care are more likely than others to be treated as whole persons.<br>7. Health professionals working as teams are more responsive than others to the emotional and financial needs of patients<br>8. The interprofessional approach permits health professionals to meet the needs of family caregivers as well as patients.<br>9. Hospital patients who receive interprofessional team care are better prepared for discharge than other patients.                                                                                          |
| team efficiency<br>(5 items)                                                                                                                                 | 10. Working in an interprofessional manner unnecessarily complicates things most of the time.<br>11. Working in an interprofessional environment keeps most health professionals enthusiastic and interested in their jobs.<br>12. In most instances, the time required for interprofessional consultations could be better spent in other ways<br>13. Having to report observations to a team helps team members better understand the work of other health professionals.<br>14. Team meetings foster communication among team members from different professions or disciplines. |
| * Likert's Scale with 5 possible responses (1=Strongly Disagree through 5=Strongly Agree);* Higher scores represent more positive attitudes toward teamwork. |                                                                                                                                                                                                                                                                                                                                                                                                                                                                                                                                                                                     |

## Research check list

### Our article title had included the following point.

1. A structured abstract (max. 300 words) of: objectives, design, results and conclusion, or that meets the standards of the relevant reporting guideline (see below).
2. An 'Article summary' section consisting of three headings: 'Article focus' (up to three bullet points on the research questions or hypotheses addressed); 'Key messages' (up to three bullet points showing the key messages or significance of the study); and a 'Strengths and limitations of this study' section. This should be placed after the abstract.
3. The original protocol for the study, where one exists.
4. A funding statement, preferably worded as follows. Either: 'This work was supported by [name of funder] grant number [xxx]' or 'This research received no specific grant from any funding agency in the public, commercial or not-for-profit sectors'.
5. A competing interests statement.
6. Articles should list each author's contribution individually at the end; this section may also include contributors who do not qualify as authors.
7. Any checklist and flow diagram for the appropriate reporting statement, e.g. STROBE (see below).
8. Any article that contains personal medical information about an identifiable living individual requires the patient's explicit consent before we can publish it. We will need the patient to sign our [consent form](#), which requires the patient to have read the article. This form is available in multiple languages.

# BMJ Open

## Simulation based inter-professional education to improve attitudes towards collaborative practice

|                                 |                                                                                                                                                                                                                                                                                                                                        |
|---------------------------------|----------------------------------------------------------------------------------------------------------------------------------------------------------------------------------------------------------------------------------------------------------------------------------------------------------------------------------------|
| Journal:                        | <i>BMJ Open</i>                                                                                                                                                                                                                                                                                                                        |
| Manuscript ID                   | bmjopen-2016-015105.R1                                                                                                                                                                                                                                                                                                                 |
| Article Type:                   | Research                                                                                                                                                                                                                                                                                                                               |
| Date Submitted by the Author:   | 09-May-2017                                                                                                                                                                                                                                                                                                                            |
| Complete List of Authors:       | Yang, Ling-Yu; Medical Education<br>Yang, Ying-Ying<br>Huang, Chia-Chang; Clinical skill training center<br>Liang, Jen-Feng; Medical education<br>Lee, Fa-Yauh; Taipei VGH<br>Cheng, Hao-Min; Division of faculty development<br>Huang, Chin-Chou; Division of Clinical skills Training Center<br>Kao, Shou-Yen; Taipei VGH, Professor |
| <b>Primary Subject Heading</b>: | Medical education and training                                                                                                                                                                                                                                                                                                         |
| Secondary Subject Heading:      | Communication                                                                                                                                                                                                                                                                                                                          |
| Keywords:                       | nurses, pharmacists, inter-professional collaboration, interdisciplinary education perception, attitudes towards health care teams                                                                                                                                                                                                     |
|                                 |                                                                                                                                                                                                                                                                                                                                        |

SCHOLARONE™  
Manuscripts



1  
2  
3 Simulation based inter-professional education to improve attitudes towards  
4 collaborative practice  
5  
6

7  
8 Ling-Yu Yang,<sup>2</sup> Ying-Ying Yang,<sup>1,3,5</sup> Chia-Chang Huang,<sup>1,3,5</sup> Jen-Feng Liang,<sup>2,5</sup>  
9 Fa-Yauh Lee,<sup>3,5</sup> Hao Min Cheng,<sup>2,5</sup> Chin-Chou Huang,<sup>1,3,5</sup> Shou-Yen Kao,<sup>3,5</sup>  
10  
11

12  
13  
14 <sup>1</sup>Division of Clinical Skills Training, <sup>2</sup>Department of Medical Education, <sup>3</sup>Department  
15 of Medicine, <sup>4</sup>Taipei Veterans General Hospital, Taipei, Taiwan  
16  
17

18 <sup>5</sup>Department of Medicine, National Yang-Ming University, Taipei, Taiwan  
19

20  
21 **Correspondence to**

22 Ying-Ying Yang; [yangyy@vghtpe.gov.tw](mailto:yangyy@vghtpe.gov.tw)  
23  
24  
25  
26  
27  
28  
29  
30  
31  
32  
33  
34  
35  
36  
37  
38  
39  
40  
41  
42  
43  
44  
45  
46  
47  
48  
49  
50  
51  
52  
53  
54  
55  
56  
57  
58  
59  
60

## ABSTRACT

**Objectives:** Inter-professional education (IPE) builds inter-professional collaboration (IPC) attitude/skills of medical professionals. This interventional IPE program aims to evaluate whether benchmarking strategy is able to cultivate seed instructors responsible for improving their team members' IPC attitudes.

**Design:** Prospective, pre-post comparative cross-sectional pilot study.

**Setting/participants:** 34 physicians, 30 nurses and 24 pharmacists, whose volunteered to be trained as seed instructors, participate 3.5-hr preparation and 3.5-hr simulation workshops. Then, participants (n=88) drew lots to decide 44 presenters, half of each profession, whose need to prepare IPC benchmarking, formed group 1, while remaining participants formed group 2 (regular). Through group 1 participants' IPC benchmarking presentation, facilitators assessed whether they appropriately transfer and sustainably practice of the learnt IPC skills at workspace by preset checklist.

**Results:** For three professions, improvement in IPC attitude was identified by sequential increase in the post-course (2<sup>nd</sup> month, T<sub>2</sub>) and end-of-study (3<sup>rd</sup> month, T<sub>3</sub>) interdisciplinary education perception scale (IEPS) and Attitudes Towards Health Care Teams Scale (ATHCTS) scores compared to pre-courses (1<sup>st</sup> month, T<sub>1</sub>) scores. By IEPS and ATHCTS-based assessment, the degree of sequential improvements in IPC attitude was higher among nurses and pharmacists than those in physicians. Through real examples in benchmarking presentation, the facilitators agreement for the degree of participants appropriately transfer and sustainably practice learnt “communication and teamwork” skills at workplace were significantly higher among pharmacists and nurses than that among physicians. The post-intervention randomly sampling survey (6<sup>th</sup> month, T<sub>post</sub>) found that the IPC attitude of three professions had improved after on-site IPC skills promotion by new program-trained seed instructors within teams.

**Conclusions:** Addition of benchmarking to diamond-based IPE simulation program enhances participants' IPC attitude, self-reflection, workspace' transfer and practice of the learnt skills. Furthermore, IPC promotion within teams by newly trained seed instructors led to improvements in IPC attitudes across all three professions.

**Keywords:** nurses, pharmacists, inter-professional collaboration, interdisciplinary education perception, attitudes towards health care teams

**Strengths and limitations of this study**

- This pilot study described the experiences of a prospective cross-sectional cohort of physicians, nurses and pharmacists who volunteered to receive serial benchmarking-enhanced diamond-based IPE simulation program for cultivating them as seed instructors to improve team members' IPC attitude.
- In our new IPE program, IPC benchmarking were implemented to enhance participants' continuous motivation to self-reflection and to promote IPC among team members.
- Using well-validated IEPS and ATHCTS, our study revealed the significant improvements in participant's motivation and IPC attitude across three professions after receiving training of our new IPE program.
- Through IPC benchmarking presentation, facilitators, in our study, revealed that participants' appropriately transfer and sustainably practice the learnt IPC skills at workplace.
- Nonetheless, the participant's satisfaction of new program and the degree of improvement in participant's competencies were not evaluated in our study.
- However, for this part, the usage of newly acquired knowledge or skills by medical professionals of our institution was not evaluated in our study.
- These results were limited to experience in one institution; the degree to which this can be extrapolated to IPE training in other institutions was not known.

## INTRODUCTION

Inter-professional education (IPE) aims to improve the coordination, communication, teamwork and leadership skills of medical professionals by learning with, from and about each other.<sup>1</sup> Two key family of learning theory including behaviorism and constructivism had been applied to the curriculum design of IPE.<sup>2,3</sup> It had been reported that learning theories for IPE are not mutually exclusive. In fact, both theorists agree that inter-professional learning “by doing” and learner centeredness are key.<sup>2,3</sup> Health care simulations are recognized as an ideal vehicle for IPE.<sup>4</sup> Today's patients have complex chronic health issues that need inter-professional collaboration (IPC) in order to delivery well-coordinated, high-quality and patient-centered care.<sup>5,6</sup> Simulation-enhanced IPE helps the development of a medical professional's IPC skills and these are very important when managing critical clinical situations.<sup>7</sup>

Baker, *et al.* study reported that 2-hour cardiac resuscitation/intravenous access simulation-based IPE prepared medical students, nursing students and junior medical residents for their future as practitioners.<sup>8</sup> Immediate attitudinal scores and responses by interdisciplinary education perception scale (IEPS) survey were consistently positive among both medical and nursing students.<sup>8</sup> Undre, *et al.* study reported that, using technical and human factors rating scales, trainers and multidisciplinary trainees assessed the crisis scenarios-based simulation training favorably especially in technical skills.<sup>9</sup> Paige, *et al.* study revealed that 3-hour simulation-based interdisciplinary operating room IPE significantly improve the trainees' self-efficacy teamwork performance in the role clarity, anticipatory response, cross monitoring, team cohesion and interaction.<sup>10</sup> In Vyas *et al.* study, using the team building and inter-professional communications survey, pharmacy student's reported that semi-urgent situations simulation-based IPE increased their understanding of professional roles and the importance of inter-professional communication.<sup>11</sup>

In Estis *et al.* study, using the attitudinal survey, speech language pathology, cardio-respiratory care and nursing students reported that simulated-based IPE enhanced their knowledge of medical professional roles/responsibilities and teamwork skills of caring tracheostomy patients with speaking valves.<sup>12</sup> Nonetheless, participants in Estis *et al.* study suggested that pre-simulation training and more structural interaction during the debriefing phase were likely to enhance effective of the IPE.<sup>12</sup> Specifially, Watters *et al.* study implemented Diamond debriefing, following description-analysis-application steps, during a 1-day simulation IPE course.<sup>13</sup> The standardized Diamond debriefing is designed to allow an high-quality exploration of the non-technical aspects of a simulated scenario. The Diamond is a two-sided prompt sheet: the first contains the scaffolding, with a series of constructed questions for each phase of the debriefing; while the second lays out the theory behind

1  
2  
3 the questions and the process.<sup>13,14</sup> In Watters *et al.* study, using the self-efficacy  
4 questionnaires, doctors and nurses reported that Diamond-based simulation increase  
5 their confidence in “communication and teamwork” skills.<sup>13</sup> Darlow *et al.* study  
6 reported that addition of preparation workshop in their 11-hour IPE program resulted  
7 in improved attitudes towards inter-professional teams and inter-professional learning,  
8 as well as self-reported ability to function within an inter-professional team.<sup>15</sup>  
9  
10

11 Taken together, previous simulation-based IPE studies<sup>8-15</sup> had lacked post-course  
12 continuous training; in addition, there is an absence of long-term follow-up that  
13 allows the transference and sustainability of IPC practice to be assessed. Furthermore,  
14 there is an absence in these studies of opportunities for the participants to reflect on  
15 their training after a period of IPC practice. In 2014, a random sampling survey of  
16 three professions at our institution revealed that IPC attitudes of physician, nurses and  
17 pharmacists need to be improved (Figure 1).  
18  
19  
20  
21  
22

23 Notably, it is important to develop feasible continuous IPE/IPC strategies to  
24 solve problems of previous studies<sup>8-15</sup> and our survey. So, our education committee  
25 targeted these three professions and organized a new IPE program that characterized  
26 by pre-simulation training, post-course continuous training, and immediate plus delay  
27 IPC attitude assessments. Additionally, post-training e-learning platform and IPC  
28 benchmarking provide opportunity for additional/deepening learning of  
29 inter-professional problem solving skills. Benchmarking, a good indicator of  
30 organization seriousness about quality, is a continuous quality improvement approach.  
31 Healthcare benchmarking provides opportunity for inter-professional participants to  
32 learn from others and develop innovative collaborative clinical care.<sup>16,17</sup> Intentionally,  
33 this pilot intervention evaluates it effects on cultivating new medical professionals as  
34 seed instructor to promote IPC within their team.  
35  
36  
37  
38  
39  
40  
41  
42  
43  
44  
45  
46  
47  
48  
49  
50  
51  
52  
53  
54  
55  
56  
57  
58  
59  
60

## METHODS

### Participants and setting

Medical professionals having longer than 1-year but less than 4-years clinical work experience were invited to participate this study (Figure 1). The participants volunteered to be trained (n=94) were invited to join the 2015 pilot benchmarking-enhanced diamond-based IPE simulation courses to improve their IPC attitude. After excluding six participants due to incomplete questionnaires, a final total of n=88 individuals were included in this study. They consisted of physicians (n=34), nurses (n=30) and pharmacists (n=24). After a brief introduction, the participants were asked to complete the pre-course (T<sub>1</sub>) on-line IPC attitude assessment that consisted of interdisciplinary education perception scale (IEPS) and the Attitudes Toward Health Care Teams Scale (ATHCTS) (supplement Table 1-2). Each on-line self-assessment was numbered so that participants remained anonymous but their numbers could be used to match their pre-course (T<sub>1</sub>) self-assessment with post-course (T<sub>2</sub>) and end-of-study (T<sub>3</sub>) self-assessment (Figure 1). All participants continued with their usual professional clinical routine throughout the 3-month interventional study.

Taipei Veterans General Hospital (TVGH) is a 3000-bed medical center providing primary and tertiary care to active-duty and retired military personnel and their dependent; in addition TVGH is the teaching hospital for several medical universities in Northern Taiwan. Between January 2015 and May 2016, we conducted a prospective cross-sectional comparative study at the high-fidelity clinical simulation and interactive learning centre of TVGH; this centre trains around 2500 staff each year. Ethical approval (2015-06-017CC) was obtained from the Ethics committee of our institution and care was taken to apply the World Medical Association Declaration of Helsinki principles to the research.

### Diamond-based benchmarking-enhanced IPE simulation program

Each participant attended a 3.5-hour preparation workshop (T<sub>1</sub>) at the first month of this study. Subsequently, a 3.5-hour simulation workshop was arranged for the participants during the second month (T<sub>2</sub>). At the end of simulation workshop, participants drew lots to decide whose (group 1) needed to prepare for post-course IPC benchmarking at the third months (T<sub>3</sub>) of study. In order to keep the fix ratio (34:30:24) among the three professions (Figure 1), half (17:15:12) of the physicians, nurses and pharmacists were selected as benchmarking group and the others as group 2 (regular). All facilitators received serial sessions training to use the Diamond debriefing strategy and to consent about how to rate their agreement about the degree of participants appropriately transfer and sustainably practice of the trained

1  
2  
3 “coordination, communication, teamwork, and leadership” skills regarding IPC at  
4 workplace by real examples in their benchmarking presentation (supplement Table 3).  
5 Especially, the Diamond Description-Analysis-Application (DAA) debriefing were  
6 used to involve participants in preparation (T1) and simulation (T2) workshops. The  
7 “description” step involving ‘description’ of each profession IPC performance in  
8 simulation scenario, the more challenging “analysis” and “application” steps  
9 involving ‘how did participants feel about each profession IPC performance in  
10 simulation scenario?’ and “how participants may apply the learnt knowledge from  
11 IPC simulation scenarios in their own clinical practice”.<sup>13,14</sup>  
12  
13  
14  
15  
16

### 17 *7-hour preparation and simulation workshop*

18  
19 *-Preparation workshop (T<sub>1</sub>)*. According to previous study design,<sup>15</sup> two  
20 small-group preparation workshops were held in two consecutive days as shown in  
21 Figure 2. The simulated examples of IPC-based care from previous study<sup>11</sup> were  
22 revised by educational committee to make into 3 video clips for IPE. They were firstly,  
23 a simulation of a distracted wife and a 61-year-old dyspnea male who suffered from  
24 recurrent asthmatic attacks due to inappropriate home medication, secondly, a  
25 simulation of a 35-year-old anxious family including a pregnant  
26 nausea/vomiting/abdominal pain female who need the selection of suitable  
27 anti-emetics and a pediatrics/gynaecology consultation in an ER setting and, finally, a  
28 simulation of a 57-year-old chest pain male with a distracted son who had the wrong  
29 allergy and ID labeling on his arm band, as well as unlocked bed in ICU setting.  
30 These 10-minutes clips provided a basis for post-video watching discussion that were  
31 led by inter-professional facilitators followed a Diamond DAA debriefing (1-hour) ;  
32 these target the role and value of the IPC healthcare team involved in the simulated  
33 clinical scenarios presented in the three video.<sup>13,14</sup>  
34  
35  
36  
37  
38  
39  
40

41 *-simulation workshop (T<sub>2</sub>)*. In our simulation centers, four small-group  
42 workshops were held in four rooms within two consecutive days (Figure 2). Using the  
43 clinical scenario outlined below, workshops were led by well-trained IPE facilitators  
44 from dietetics, social workers and respiratory therapists. This scenario, which  
45 incorporates multi-disciplinary care, was modified by previous study<sup>12</sup> and had been  
46 dry ran before formally used. A patient scenario involving Mr. Jason was developed  
47 collaboratively by the faculty members of the above mentioned professions.  
48 Participants were given the following information. Mr. Jason has a history of chronic  
49 obstructive pulmonary disease (COPD), smokes 60 packs per year of cigarettes and  
50 has hypertension, diabetes, coronary artery disease and atrial fibrillation. He has been  
51 admitted for acute exacerbation of his COPD five times in the past one year. Home  
52 medication includes aspirin, a calcium channel blocker, mycolytic agents, inhalation  
53  
54  
55  
56  
57  
58  
59  
60

1  
2  
3 corticosteroid/bronchodilator and subcutaneous administered insulin. Mr. Jason was  
4 admitted 3 weeks ago for emergent coronary artery bypass grafting surgery. Although  
5 there has been aggressive management with regular chest percussion, he had difficulty  
6 to wean from ventilator due to poor sputum expectation and malnutrition. The  
7 primary care teams are now considering a tracheostomy and intensive chest/nutrition  
8 therapy. His family members are at the bedside. During the simulation, a pre-set  
9 intubated high-fidelity SimMan® 3G simulator acted as the patient and standardized  
10 patients (SPs) were used as his family. Then, the 3.5-hour workshops were ran (Figure  
11 2).

12  
13  
14  
15  
16 Before the beginning of the simulation, the participants were presented with  
17 above mentioned case's name, age, gender, admission diagnosis and current  
18 medication/management. In the three simulation phases, the participants involved  
19 were expected to carry out assessment, treatments, and general care of the patients,  
20 collaboratively. Then, the participants began the post-simulation debriefing phase and  
21 reflected on the challenges, pitfalls, and successes that occurred within the simulation.  
22

23  
24  
25 *The IPC benchmarking (T<sub>3</sub>) of the Group 1 participants.* As mentioned above, 17  
26 physicians, 15 nurses and 12 pharmacists formed group 1 and these participants  
27 underwent IPC benchmarking. Presenters were asked to give their four examples of  
28 appropriately transfer and sustainably practice learnt IPC skills at workplace.  
29 Randomly, four small groups (n=11) with ratio (4:4:3, 4:4:3, 4:4:3 and 5:3:3) of  
30 physician to nurse to pharmacists were presented in four rooms in two consecutive  
31 days. During benchmarking, two facilitator's rated their 5-point Likert's-scale-based  
32 agreement to the presenters' degree of appropriately transfer and sustainably practice  
33 of the learnt IPC skills at workspace by preset checklist (Supplement Table 3). In each  
34 room, 4 hours (240 minutes) were needed for 11 presenters to complete their  
35 20-minutes presentation (15-min.)/discussion (5-min.). Each presentation was  
36 recorded as a video by teaching assistants (TAs) to help with continuous IPC  
37 promotion. With the agreement of presenters, the TAs uploaded edited versions of the  
38 video to the e-learning platform. The Group 2 participants were asked to join this  
39 end-of-study (T<sub>3</sub>) IPC benchmarking.  
40

41  
42  
43  
44  
45  
46  
47 *-e-learning platform.* Both the group 1 and the group 2 participants were invited  
48 to use a common IPE e-learning platform containing the above mentioned scenario,  
49 various power points presentations, the video used in preparation/simulation  
50 workshop and the video from the IPC benchmarking to encourage self-directed  
51 learning, freely.  
52  
53  
54

### 55 **Measurements of IPC attitudes**

56  
57 In our study, we measured participants' IPC attitudes with Interdisciplinary  
58  
59



1  
2  
3 education perception scale<sup>18-20</sup> (IEPS, supplement Table 1), Attitudes Toward Health  
4 Care Teams Scale<sup>21</sup> (ATHCTS, supplement Table 2) and single-open-ended items  
5 descriptive feedback. IEPS is a 18-items scale that further classified into four  
6 subscales including “Competency and Autonomy”, “Perceived Need for Cooperation”,  
7 “Perception of Actual Cooperation” and “Understanding Others’ Values”. ATHCTS is  
8 a 20-items scale that consists of quality of care/process (14 items) and physician  
9 centrality (6 items) subscales'. Additionally, participants were asked to provide  
10 qualitative feedback freely by answering single-open-ended question “*what is the one*  
11 *thing you are going to take away with you at the end of this course?*” in the online  
12 post-courses self assessment (T<sub>3</sub>). This question was designed to prompt a participant  
13 to reflect on their own learning during the course and allowed program director to  
14 gather evidence on which elements within the courses seemed to be contributing the  
15 most to the learning experience.  
16  
17  
18  
19  
20  
21  
22

### 23 **Pre-intervention (T<sub>pre</sub>) and Post-intervention (T<sub>post</sub>, 6<sup>th</sup> month) random sampling** 24 **survey of IPC attitudes** (Figure 1) 25

26 Using IPC core elements-based questionnaires (supplement Table 4), across the  
27 three professions, the effectiveness of the well-trained seed instructors in terms of  
28 team IPC promotion and IPC attitude modification was evaluated by comparison the  
29 T<sub>pre</sub> and T<sub>post</sub> IPC attitude scores<sup>22-24</sup>. In total 132 valid T<sub>post</sub> questionnaires were  
30 collected for comparison with another 132 valid T<sub>pre</sub> questionnaires. These  
31 anonymous T<sub>pre</sub> and T<sub>post</sub> questionnaires were completed by random members  
32 sampled from the three professions, namely 51 physicians, 45 nurses and 36  
33 pharmacists twice. In other words, the individuals who responded to the online IPC  
34 attitude survey might be but are not necessarily different between T<sub>pre</sub> and T<sub>post</sub> survey.  
35 However, it is important to note that the enrolled participants in our interventional  
36 study were excluded from the sampling pool for T<sub>post</sub> sampling survey.  
37  
38  
39  
40  
41  
42

### 43 **Analysis**

44 Outcomes of our new training program were analyzed according to the Kirkpatrick  
45 levels.<sup>25</sup> Since the IEPS and ATHCTS items are ordinal in nature, Wilcoxon's signed  
46 rank test was used to analyze each item. The means of the overall IEPS score and the  
47 four subscales were evaluated with the Student's two-tailed paired *t*-test for  
48 continuous measures, with the aim of detecting any differences between T<sub>1</sub> and T<sub>2</sub> as  
49 well as T<sub>2</sub> and T<sub>3</sub> time-points. Data from the IEPS and ATHCTS were matched by  
50 profession for analysis with one-way ANOVA or Mann-Whitney U test to detect the  
51 significant difference between among groups.  
52  
53  
54  
55  
56  
57  
58  
59  
60

## RESULTS

The baseline characteristics of the participants, including mean age, gender and clinical experiences, were similar across the physicians, nurses and pharmacist as can be seen in Table 1. Notably, a lower number of the physicians compared to nurses and pharmacists had experience of receiving previous IPE training. In comparison with nurses and pharmacists, lower percentage of physicians belong to the high-exposure (>80% exposure to monthly IPC meeting/1-year) group, which indicated physician's have less experiences of previous IPC meeting participation during their last 1-year of clinical works

We assessed internal consistency of the IEPS/ATHCTS and its subscales by computing Cronbach's alpha coefficients. Notably, the Cronbach's alpha of IEPS overall scales (0.721), competency and autonomy subscales (0.69), Perceived need for cooperation subscales (0.73), Perception of actual cooperation subscales (0.85) and Understanding others values subscales (0.662) were good. Meanwhile, the Cronbach's alpha of ATHCTS overall scales (0.719), Quality of care delivery subscales (0.683), Patient-centered care subscales (0.801) and Team efficiency subscales (0.724) were acceptable.

The baseline IPC attitude, pre-course ( $T_1$ ) IEPS scores and pre-course ( $T_1$ ) ATHCTS scores were also similar across the physicians, nurses and pharmacist (Table 2). Compared to nurses, there were lower scores for the “competency and autonomy” and “understanding others values” basal IEPS subscales ( $T_1$ ) among the physicians. Similarly, also compared to nurses, there were lower scores for the “competency and autonomy” and “perception of actual cooperation” basal IEPS subscales ( $T_1$ ) among the pharmacists. Notably, the “competency and autonomy” subscale of IEPS score and the “team efficiency” subscale of the ATHCTS score ( $T_2-T_1$ ) were increased by the 7-hour stepwise simulation-enhanced IPE course across all three categories, physicians, nurses and pharmacists and, especially, the magnitude of increase in IEPS and ATHCTS scores were significantly greater among the nurses and pharmacist than the physicians (Table 2). Obviously, pharmacists had the highest increase in percent change of post-courses ( $T_2$ ) ATHCTS score from pre-courses ( $T_1$ ) score than those in nurses and physicians (Table 2).

Based on the IPC benchmarking presentations of group 1 participants, the facilitators found that physicians were more appropriately transfer and sustainably practice of the learnt IPC “coordination and leadership” skills at workspace than nurses and pharmacists (Table 3). Furthermore, the facilitators reported that nurses and pharmacists were more appropriately transfer and sustainably practice the learnt IPC “communication and teamwork” skills at workspace than physicians (Table 3). Notably, the inter-rater reliability (Kappa statistics) on the items used to assess

whether participants appropriately transfer and sustainably practice the learnt IPC skills by benchmarking facilitators were good (Table 4).

In open-ended questions at the end of our study, most participants reported that watching the IPE-specific video and discussing it, as well as viewing the uploaded videos on the e-learning platform, markedly encourage their motivation to improve their IPC attitude. Specifically, the participant's reported that the availability of an IPE/IPC-specific e-learning platform was able to continuously improve the users' IPC attitude by providing useful resource and instruction.

Selected completed feedback sentences by the participants freely response open-ended items of post-course self-assessment (T3) are listed as below:

1. Benefits of our new benchmarking-enhanced diamond-based IPE simulation courses.

*"this IPE courses improve inter-professional relationships, communication skills, efficiency in holistic patient care and services delivery, team work, respect for one another and build confidence in their my profession".*

2. Identified IPE/IPC elements in collaborative training.

*"we are all geared to patient-centered care, all professions need to use their best assessment and judgment to evaluate patients in order to provide the best patient care that we can";*

*"we understand that there is a lot of team work going on our institution";*

*"we understand that all professions should be encouraged within their training program to become independent in order to make IPC work better";*

3. Improved skills of quality of clinical care.

*"There are situations that are different, but we do have to rely on the expertise of other professionals' in order to obtain the best outcome for the patient";*

*"we were able to collaborate very well with other professional health care members, especially with the nurses in their second simulation; they sort of referred to us regarding our drug management skills and sort of learned how important pharmacists can actually be in a hospital setting."*

4. Skills that learnt from their skillful facilitators

*"sometime staying in your own profession is great and everything, but you really sort of need to reach outwards and see what other professions have to offer, because only if you do that can you truly use the entire knowledge base of other profession and provide the best patient care."*

Compared to pre-courses (T<sub>1</sub>) scores, the degree of increase in total IEPS and ATHCTS scores at post-courses (T<sub>2</sub>) self assessments were not different between group 1 and 2 participants (data not shown). Among the group 1 and 2 participants, similar or higher end-of-study (T<sub>3</sub>) IEPS and ATHCTS scores than post-courses (T<sub>2</sub>) scores indicated the sustained effects of 7-hour simulation-based diamond-enhanced IPE courses (Figure 3). From the post-course (T<sub>2</sub>) to end-of-study (T<sub>3</sub>) period, a significantly greater increase in the total IEPS and ATHCTS scores of the group 1 (benchmarking) participants than the group 2 (regular) participants can be seen

1  
2  
3 (Figure 3). This indicates that the additional benefits of IPC benchmarking on the  
4 group 1 participant's IPC attitude. Among the benchmarking-group' participants, the  
5 most improved items were the “competency and autonomy” and “perception of actual  
6 cooperation” subscales of the IEPS and the “quality of care delivery” and “team  
7 efficiency” subscales of the ATHCTS, when the T<sub>2</sub> and T<sub>3</sub> self-assessments were  
8 compared.  
9

10  
11 Among the randomly sampled team members, pre-intervention survey (T<sub>pre</sub>)  
12 revealed that IPC attitudes across physicians, nurses and pharmacists, are needed to be  
13 improved on the aspects of IPC' familiarity, understanding of other profession's roles,  
14 benefits of IPC on quality of patient-centered care (Figure 3C). Across three  
15 professions, after seed instructors began promoting IPC at workplace,  
16 post-intervention (T<sub>post</sub>, 6<sup>th</sup> month) randomly sampled team member's reported that  
17 they were familiar with IPC skills, agreed that IPC help to understand the role of other  
18 team members, agreed that IPC improved patient care quality and agreed that IPC  
19 improved team efficiency (Figure 3C). Interestingly, the agreements of random  
20 sampled team members', across three professions, to the statement of “IPC helps  
21 provide patient-centered care” are excellent both during the pre-intervention (T<sub>pre</sub>)  
22 and post-intervention (T<sub>post</sub>) surveys (Figure 3C).  
23  
24  
25  
26  
27  
28  
29  
30  
31  
32  
33  
34  
35  
36  
37  
38  
39  
40  
41  
42  
43  
44  
45  
46  
47  
48  
49  
50  
51  
52  
53  
54  
55  
56  
57  
58  
59  
60

## DISCUSSION

Debriefing can help learner to clarify and integrate the simulation experience with their previous knowledge.<sup>8,10,11,22-24</sup> The Diamond debriefing method encourages a standardized approach to high-quality debriefing across courses, which benefits both the participants and the involved faculty members.<sup>13,14</sup> The Diamond DAA method is related to various aspects of the advocacy-inquiry approach and of debriefing with good judgment. The Diamond provides an easy but pedagogically sound structure to follow and also makes available specific prompts to use in an appropriate moment. Nonetheless, the long-term effects of structured debriefing had not been throughfully evaluated in previous simulated-enhanced IPE studies.<sup>8-15</sup>

In addition to serial subjective and objective assessments, our new IPE model is characterized by Diamond debriefing strategy (Figure 2). When trying to improve each medical professional's IPC attitude with limited resource, including the time needed to carry out the training etc., the number of faculty members needed to run the training and the facilities needed for the training, each newly trained participant should acted as a seed instructor within their team. In other words, successful training of seed instructors can result in profession-wide IPC promotion and attitude remodeling. In our study, this well-organized design allows each participant from three professions to have equal IPE exposure, which helps their development as seed instructors in their healthcare team.

By training volunteers from physicians, nurses and pharmacists, our interventional training program aims to change participant's behaviors and to act as seed instructors for promoting IPC in team member. In our study, the post-intervention survey, which performing after the sequential simulation-based IPE courses, revealed that there was significant improvement in randomly sampled team member's IPC attitude across physicians, nurses and pharmacists.

The strengths of our pilot study are the extension of IPE by e-learning platform, benchmarking and continuous self-evaluations. Previous studies had suggested that training videos consistently enhance the observational powers of trainees, as well as improving their ability to integrate different information and increasing their motivation to learn.<sup>26,27</sup> In our study, most participants reported that the availability of an e-learning platform that has sufficient IPE resources help to continue their self-directed learning. Meanwhile, the benchmarking provides the enrolled participants with the opportunity for IPC self-reflection as well as enhancing their motivation as seed instructors in their teams.

Primarily, this new simulation-based IPE program was intended to solve challenges, which are lack of continuous training and follow-up, of previous studies<sup>8-13,15</sup> and our institution. Indeed, there were some limitations in our study that

1  
2  
3 need to be improved in future study before concluding the effectiveness of this pilot  
4 benchmarking-enhanced diamond-based IPE program on medical professionals' IPC  
5 practices and outcomes.  
6

7  
8 For a training program, Kirkpatrick level 1 and 2 were the evaluation of  
9 "participants satisfaction" and "participants increase confidence, knowledge and  
10 performance". Using IEPS and ATHCTS, our study revealed the significant  
11 improvements in participant's motivation and IPC attitude across three professions  
12 after receiving training of our new IPE program. Nonetheless, the participant's  
13 satisfaction of new program and the degree of improvement in participant's  
14 competencies were not evaluated in our study. Kirkpatrick level 3 and 4 in our study  
15 were the "multiplication" of knowledge by "seeding" and influence on the health care  
16 system. According to the real presented example in benchmarking of our study,  
17 facilitators' gave high ratings for their agreement to participants' degree of  
18 appropriately transfer and sustainably practice the learnt IPC skills to clinical works.  
19 The sequential improvements in participants' self-assessed IPC attitude scores were  
20 also noted in our study. Moreover, the comparison of pre-intervention and  
21 post-intervention random sampled team members, whose are non-participants,  
22 revealed the general improvement in their IPC attitude and motivation. However, for  
23 this part, the usage of newly acquired knowledge or skills by medical professionals of  
24 our institution was not evaluated in our study. Taken together, our pilot study only  
25 achieved parts of the goals of a training program according to the Kirkpatrick 1-4  
26 levels.<sup>25</sup>  
27  
28

29  
30 Our IPE approach targets IPC attitude specifically using a number of defined  
31 types of patient scenario that are suitable for all three of the enrolled professions.  
32 Nonetheless, the specific IPC skills required for holistic care of COPD cases are  
33 obviously different from those need to care for acute renal failure cases. Undoubtedly,  
34 IPC skills are learned more readily when the simulation-enhanced IPE used is more  
35 specific to relevant type of clinical situation. In our study, this limitation was  
36 alleviated by the multi-professional post-simulation diamond debriefing during a  
37 3.5-hour simulation workshop and the fact that the enrolled participants continued to  
38 carry out their regular clinical routines during the 3-month intervention period. In  
39 other words, our enrolled participants were likely to interacting with other professions  
40 in their clinical routine after the first and second stimuli presented during the  
41 preparation and simulation workshops. In fact, it has been suggested that the  
42 participants who have learnt IPC skills in a variety of simulation modules will be able  
43 to synthesize a higher level of IPC abilities that can then be applied across many  
44 clinical situations.  
45  
46  
47  
48  
49  
50  
51  
52  
53  
54  
55  
56  
57  
58  
59  
60

1  
2  
3 As participation in this course was voluntary, participants were likely to be  
4 more highly motivated than others, which may limit the generalizability of our results.  
5 Actually, the positive effects of diamond debriefing and preparation workshop had  
6 been reported in previous simulated-based IPE studies.<sup>13-15</sup> In our study, the lack of  
7 control groups without diamond method and preparation workshop, to exclude more  
8 effects of them on inter-professional skills, may still limit us to conclude the definite  
9 effectiveness of benchmarking-enhanced IPE on training. Both IEPS and ATHCTS  
10 have been suggested as reliable tools to assess the effectiveness of practice-based IPE  
11 interventions.<sup>19-21</sup> It had been validated that each subscale of IEPS and ATHCTS is a  
12 strong measurement for underlying IPC concepts that are crucial to medical  
13 professions.<sup>19-21</sup>

14  
15  
16 In Table 3, through real examples in benchmarking presentation, the facilitators  
17 agreement for the degree of participant's appropriately transfer and sustainably  
18 practice learnt "communication and teamwork" skills at workplace were significantly  
19 higher among pharmacists and nurses than that among physicians. This result can be  
20 explained by higher percentage of pharmacists (43,45%) and nurses (35,36%) had  
21 experience of receiving previous IPE training and higher frequency of exposure to  
22 IPC meeting during their last 1-yr of clinical works than that among physicians  
23 (14,15%) (Table 1). Notably, the core elements in the constructive assessment tools,  
24 IEPS and ATHCTS, used in our studies were more focused on "communication and  
25 teamwork" than "coordination and leadership" skills." So, from Table 2, it seems that  
26 pharmacists and nurses perform better than physicians. Nonetheless, the facilitators'  
27 agreement for the degree of participant's appropriately transfer and sustainably  
28 practice learnt "coordination and leadership" skills at workplace were significantly  
29 higher among physicians than pharmacists and nurses in benchmarking presentation  
30 (Table 3). This might be caused by the culture that physicians take over the role of the  
31 leadership in healthcare system. These results remind educator to rethink about the  
32 strategy to balance the inter-professional trainings.

## 33 34 35 36 37 38 39 40 41 42 43 44 45 **CONCLUSIONS**

46 Our benchmarking-enhanced diamond-based IPE simulation program was able to  
47 cultivated participants as seed instructors to modify the IPC attitude of their team  
48 members. The results of this plot study are promising and suggest that a future  
49 large-scale study that extension to professions other than the three enrolled  
50 professions here should be considered. As enhancement of inter-professional skills  
51 can ensure high-quality patient care, seed instructor training can be suggested as  
52 personal development plan for every medical professional.  
53  
54  
55  
56  
57  
58  
59  
60

1  
2  
3  
4 **Acknowledgements** The authors express their gratitude to all members of the General  
5  
6 Medicine Teaching Demonstration Center for their input for this article. We also  
7  
8 gratefully appreciate professor Ralph Kirby help us to correct the English writing of  
9  
10 our manuscript.

11  
12 **Funding** This work was supported by the government Ministry of Health and  
13  
14 Welfare and Taiwan Association of Medical Education (TAME) and V105EA-005 of  
15  
16 TVGH from the Taipei Veterans General Hospital, Taipei, Taiwan.

17  
18  
19 **Contributors** All authors actively participated in analysis of the research results.  
20  
21 YYY, FYL, JFL were responsible for study design. YYY, FYL, LYY, CCH  
22  
23 participated in the questionnaires. YYY, CCH, HMC, FYL participated in the creation  
24  
25 and management of the database. YYY, FYL, SYK, CCH were responsible for the  
26  
27 statistical analysis and writing of the manuscript.

28  
29  
30 **Competing interests** None.

31  
32 **Data Sharing Statement** No additional data available  
33  
34  
35  
36  
37  
38  
39  
40  
41  
42  
43  
44  
45  
46  
47  
48  
49  
50  
51  
52  
53  
54  
55  
56  
57  
58  
59  
60



## FIGURES AND LEGENDS

**Figure 1 Study flow chart.** Diamond Description-Analysis-Application (DAA) debriefing were used to involve all participants. The “description” step involving ‘description’ of each profession IPC performance in simulation scenario, the more challenging “analysis” and “application” steps involving ‘how did participants feel about each profession IPC performance in simulation scenario?’ and “how participants may apply the learnt knowledge from IPC simulation scenarios in their own clinical practice”. In order to provide opportunity for inter-professional participants to learn from others and develop innovative collaborative clinical care, presenter gave their success examples of beside IPE/IPC in benchmarking.

**Figure 2 Protocols for small group preparation and simulation workshops which ran in separate rooms in two consecutive days**

**Figure 3 Benchmarking-enhanced IPE pilot program improved participants and their team members' IPC attitudes.** The comparison of sequential changes of post-course ( $T_2$ ) and end-of-study ( $T_3$ ) subscales and scales of IEPS (A) and ATHCTS (B) between group 1 (benchmarking) and group 2 (regular) participants. (C). Comparison of responses from 132 randomly sampled members from the three professions (51 physicians, 45 nurses, 36 pharmacists twice) about IPC's attitudes in pre-intervention ( $T_{pre}$ ) and post-intervention ( $T_{post}$ ) survey. IPC attitude was assessed by five Likert scale responses ranging from 1: strongly disagree to 5: strongly agree. \* $p < 0.01$  vs. post-course ( $T_2$ ) or pre-intervention ( $T_{pre}$ ) scores; # $p < 0.01$  vs. group 2 participants' scores.

## REFERENCES

1. Frenk J, Chen L, Bhutta ZA. Health professionals for a new century: transforming education to strengthen health systems in an interdependent world. *Lancet* 2010;376(9756):1923-58.
2. Reeves S, Hean S. Why we need theory to help us better understand the nature of interprofessional education, practice and care. *J Interprof Care* 2013;27(1):1-3.
3. Hean S, Craddock D, O'Halloran C. Learning theories and interprofessional education: A user's guide. *Learn Teach Health Soc Care Pract* 2009b; 8(4):250-62.
4. Pinar G. Simulation-enhanced interprofessional education in health care. *Creative Educ* 2015;6:1852-9.
5. Deschodt M, Flamaing J, Haentjens P, *et al.* Impact of geriatric consultation teams on clinical outcome in acute hospitals: a systemic review and meta-analysis. *BMC Med* 2013;11:38.
6. Lapkin S, Levett-Jones T, Gilligan C. A systemic review of the effectiveness of interprofessional education in health professional programs. *Nurse Educ Today* 2013;33(2):90-102.
7. Interprofessional Education Collaborative Expert Panel. Core competencies for interprofessional collaborative practice: report of an expert panel. Washington, D.C.: Interprofessional Education Collaborative; 2001.
8. Baker C, Pulling C, McGraw R, *et al.* Simulation in interprofessional education for patient-centered collaborative care. *J Adv Nurs* 2008;64(4):372-9.
9. Undre S, Koutantji M, Sevdalis N, *et al.* Multidisciplinary crisis simulations: the way forward for training surgical teams. *World J Surg* 2007;31(9):1843-53.
10. Paige JT, Kozmenko V, Yang T, *et al.* High-fidelity, simulation-based, interdisciplinary operating room team training at the point of care. *Surgery* 2009;145(2):138-46.
11. Vyas D, McCulloh R, Dyer C, *et al.* An interprofessional course using human patient simulation to teach patient safety and teamwork skills. *Am J Pharm Educ* 2012;76(4):71.
12. Estis JM, Rudd AB, Pruitt B, Wright T. Interprofessional simulation-based education enhances student knowledge of health professional roles and care of patients with tracheostomies and Passy-Muir® Valves. *J Nurs Educ Practice* 2015;5(6):123.
13. Watters C, Reedy G, Ross A, *et al.* Does interprofessional simulation increase self-efficacy: a comparative study? *BMJ Open* 2015;5:e005472.
14. Jaye P, Thomas L, Reedy G. "The diamond": a structure for simulation debrief. *The Clinical Teacher*. 2015;12:171-175.

15. Darlow B, Coleman K, McKinlay E, *et al.* The positive impact of inter-professional education: a controlled trial to evaluate a programme for health professional students. *BMC Med Educ* 2015;15:98.
16. Ellis J. All inclusive benchmarking. *J Nurs Manag* 2006;14(5):377-83.
17. Ellis J. Sharing the evidence: clinical practice benchmarking to improve continuously the quality of care. *J Adv Nurs* 2000;32(1):215-25.
18. Byakika-Kibwika P, Kutesa A, Baingana R, *et al.* A situation analysis of inter-professional education and practice for ethics and professionalism training at Makerere University College and Health Sciences. *BMC Res Notes* 2015;8:598.
19. Luecht RM, Madsen MK, Taugher MP, *et al.* Assessing professional perceptions: design and validation of an Interdisciplinary Education Perception Scale. *J Allied Health* 1990;19(2):181-91.
20. Buelow J, McAdams R, Adams A, *et al.* Interdisciplinary teamwork: student differences and teaching implications. *Am J Health Sci* 2010;1(1):11-21.
21. Heinemann GD, Schmitt MH, Farrell MP, *et al.* Development of an Attitudes Toward Health Care Teams Scale. *Eval Health Prof* 1999;22(1):123-42.
22. Reese C, Jeffries PR, Engum SA. Learning together: using simulations to develop nursing and medical student collaboration. *Nurs Educ Perspect* 2011;31(1):33-37.
23. Robben S, Perry M, Nieuwenhuijzen L. van, *et al.* Impact of interprofessional education on collaboration attitudes, skills, and behavior among primary care professionals. *J Contin Educ Health Prof* 2012;32(3):196-204.
24. Oandasan I, Reeves S. Key elements of interprofessional education. Part 2: factors, processes and outcomes. *J Interprof Care* 2005;19(suppl 1): 39-48.
25. Salvatore VF. Evaluating training programs: The four levels, by Donald L. Kirkpatrick, Berrett-Koehler Publishers: *Am J Eval* 1998;19:259-61.
26. Chan LK, Patil NG, Chen JY, *et al.* Advantages of video trigger in problem-based learning. *Med Teach* 2010;32:760-5.
27. Balslev T, de Grave WS, Muijtjens AMM, *et al.* Comparison of text and video cases in a postgraduate problem-based learning format. *Med Educ* 2005;39(11):1086-92.

1  
2  
3  
4  
5  
6  
7  
8  
9  
10  
11  
12  
13  
14  
15  
16  
17  
18  
19  
20  
21  
22  
23  
24  
25  
26  
27  
28  
29  
30  
31  
32  
33  
34  
35  
36  
37  
38  
39  
40  
41  
42  
43  
44  
45  
46  
47  
48  
49

|                                                                                                                                                            | <b>Physicians (n=34)</b> | <b>Nurses (n=30)</b> | <b>Pharmacists (n=24)</b> |
|------------------------------------------------------------------------------------------------------------------------------------------------------------|--------------------------|----------------------|---------------------------|
| <b>Age (years)</b>                                                                                                                                         | 31.3± 2.7                | 29.1 ±4.8            | 30.5 ±3.6                 |
| <b>Female/male (No.)</b>                                                                                                                                   | 30/4                     | 27/3                 | 10/14                     |
| <b>Percentage of distribution of clinical-work-year of participants among groups</b>                                                                       |                          |                      |                           |
| <b>1-2/2-3/ 3-4 years (%)</b>                                                                                                                              | 76/14/10%                | 84/10/6%             | 69/20/11%                 |
| <b>Percentage of distribution of participants with and without experience of receiving previous IPE training</b>                                           | 15/85% <sup>#</sup>      | 35/65%               | 45/55%                    |
| <b>Percentage of distribution of participants with high/low frequency of exposure to IPC meeting during their last 1-yr of clinical works among groups</b> |                          |                      |                           |
| <b>Percentage of ‡high-exposure participants</b>                                                                                                           | 14% <sup>#</sup>         | 36%                  | 43%                       |
| <b>Percentage of † low-exposure participants</b>                                                                                                           | 86% <sup>#</sup>         | 64%                  | 57%                       |

<sup>#</sup>p<0.01 vs. corresponding nurse's/pharmacist's group; ‡high-exposure participants indicated individual that participating more than 80% of monthly IPC meeting; †low-exposure participants indicated individual that participating less than 20% of monthly IPC meeting.

|                                                                                                                                                                                | Physicians (n=34)            |                               | Nurses (n=30)                |                               | Pharmacists (n=24)          |                               |
|--------------------------------------------------------------------------------------------------------------------------------------------------------------------------------|------------------------------|-------------------------------|------------------------------|-------------------------------|-----------------------------|-------------------------------|
|                                                                                                                                                                                | pre-course (T <sub>1</sub> ) | post-course (T <sub>2</sub> ) | pre-course (T <sub>1</sub> ) | post-course (T <sub>2</sub> ) | pre-course(T <sub>1</sub> ) | post-course (T <sub>2</sub> ) |
| <b>Total IEPS-18 scores [6-point scale]</b>                                                                                                                                    | 56±1.8 <sup>#</sup>          | 76±9.8 <sup>*,#</sup>         | 65±1.6                       | 91±1.2                        | 64±8                        | 91±4.7 <sup>*</sup>           |
| percent change of total IEPS post-course (T <sub>2</sub> ) score from pre-course (T <sub>1</sub> ) score                                                                       |                              | 18%                           |                              | 40% <sup>†</sup>              |                             | 42% <sup>†</sup>              |
| <b>IEPS subscales scores</b>                                                                                                                                                   |                              |                               |                              |                               |                             |                               |
| Competency and autonomy (8 items)                                                                                                                                              | 24±3.5 <sup>#</sup>          | 28±4.1 <sup>*,#</sup>         | 30±4.5                       | 39±7.2 <sup>*</sup>           | 22±5.4                      | 40±6.1 <sup>*</sup>           |
| Perceived need for cooperation (2 items)                                                                                                                                       | 7±2.2                        | 9±1.6                         | 8±2.9                        | 10±1.8                        | 9±3                         | 11±1.8                        |
| Perception of actual cooperation (5 items)                                                                                                                                     | 17±2.7                       | 24±3.7 <sup>*,#</sup>         | 15±1.2                       | 26±4.3 <sup>*</sup>           | 20±4.8                      | 23±2.5                        |
| Understanding others values (3 items)                                                                                                                                          | 8±2.4 <sup>#</sup>           | 15±2.9 <sup>*</sup>           | 12±3.8                       | 16±1.4                        | 13±2.1                      | 17±5.1 <sup>*</sup>           |
| <b>Total ATHCTS-14 [5-point scale]</b>                                                                                                                                         | 39±2.3                       | 48±5.4 <sup>*</sup>           | 38±2.6                       | 51±4.6                        | 32±3.7                      | 54±7.5                        |
| percent change of total ATHCTS post-course (T <sub>2</sub> ) score from pre-course (T <sub>1</sub> ) score                                                                     |                              | 23%                           |                              | 34% <sup>†</sup>              |                             | 69% <sup>†</sup>              |
| <b>ATHCTS subscales scores</b>                                                                                                                                                 |                              |                               |                              |                               |                             |                               |
| Quality of care delivery (5 items)                                                                                                                                             | 14±2.2                       | 15±1.8 <sup>#</sup>           | 13±1.6                       | 18±4.1 <sup>*</sup>           | 12±4.2                      | 20±2.0 <sup>*</sup>           |
| Patient-centered care (4 items)                                                                                                                                                | 13±1.7                       | 18±2.1 <sup>*</sup>           | 15±7.4                       | 19±3.3                        | 11±2.8                      | 18±3.5 <sup>*</sup>           |
| Team efficiency (5 items)                                                                                                                                                      | 12±1.1                       | 15±3.7 <sup>*</sup>           | 10±1.9                       | 14±2.7 <sup>*</sup>           | 9±2.6                       | 16±4.1 <sup>*</sup>           |
| Data were expressed as mean±SD; * <i>p</i> <0.01 vs. pre-course scores; # <i>p</i> <0.01 vs. corresponding nurse's/pharmacists score's; † <i>p</i> <0.01 vs. physicians scores |                              |                               |                              |                               |                             |                               |

**Table 3 Comparison of facilitators' agreement to group 1 participant's degree of appropriately transfer and sustainably practice of the learnt IPC skills at workplaces according to 4 real examples in their benchmarking presentation**

|           |                                                                                  | Physicians (n=17) | Nurses (n=15)         | Pharmacists (n=12)   |
|-----------|----------------------------------------------------------------------------------|-------------------|-----------------------|----------------------|
| Example 1 | [1-1].Presenter transfers the “coordination” skills appropriately at workplaces  | 4.3±0.64          | 3.6±0.7 <sup>#</sup>  | 3.9±0.8 <sup>#</sup> |
|           | [1-2].Presenter practices the “coordination” skills sustainably at workplaces    | 4.6±0.54          | 3.3±0.21 <sup>#</sup> | 4.1±0.7 <sup>#</sup> |
| Example 2 | [2-1].Presenter transfers the “communication” skills appropriately at workplaces | 3.9±0.52*         | 4.1±0.94              | 4.4±0.7              |
|           | [2-2].Presenter practices the “communication” skills sustainably at workplaces   | 3.3±0.71*         | 4.01±0.76             | 4.8±0.1              |
| Example 3 | [3-1].Presenter transfers the “teamwork” skills appropriately at workplaces      | 3.4±0.502*        | 4.5±0.46              | 4.1±0.9              |
|           | [3-2].Presenter practices the “teamwork” skills sustainably at workplaces        | 3.8±0.2*          | 4.7±0.1               | 4.5±0.6              |
| Example 4 | [4-1].Presenter transfers the “leadership” skills appropriately at workplaces    | 4.4±0.803         | 3.4±0.61 <sup>#</sup> | 4.0±0.5 <sup>#</sup> |
|           | [4-2].Presenter practices the “leadership” skills sustainably at workplaces      | 4.7±0.4           | 3.0±0.3 <sup>#</sup>  | 3.8±0.4 <sup>#</sup> |

Data were expressed as mean±SD; The IPC skills including coordination, communication, teamwork and leadership. Presenters were asked to present their four examples according to the sequences of items listed above. Sequentially, benchmarking' example 1 for item 1-1&1-2, example 2 for item 2-1&2-2, example 3 for item 3-1&3-2, example 4 for item 4-1&4-2 were presented. Facilitator's degree of agreement to presenters' performance were rated by 5-point Likerts scale-based (1=strongly disagree, 2=disagree, 3=neutral, 4=agree, 5=strongly agree); By consensus meeting, facilitators rate their agreement to the items 1-1 and 1-2 according to the example 1 of presenter, items 2-2 and 2-2 from example 2, item 3-1 and 3-2 from example 3, items 4-1 and 4-2 from example 4 in separate rooms. The results were averaged data of ratings completed by two facilitators for presenter's performance of each item in above checklist; #p<0.05 vs. physician's group; \*p<0.05 vs. nurse's/pharmacist's group.

1  
2  
3  
4  
5  
6  
7  
8  
9  
10  
11  
12  
13  
14  
15  
16  
17  
18  
19  
20  
21  
22  
23  
24  
25  
26  
27  
28  
29  
30  
31  
32  
33  
34  
35  
36  
37  
38  
39  
40  
41  
42  
43  
44  
45  
46  
47  
48  
49

**Table 4 Inter-rater reliability of facilitators' benchmarking ratings derived from group 1 participants**

|                                                                                  | Physicians | Nurses | Pharmacists |
|----------------------------------------------------------------------------------|------------|--------|-------------|
|                                                                                  | Kappa      | Kappa  | Kappa       |
| [1-1].Presenter transfers the “coordination” skills appropriately at workplaces  | 0.73       | 0.71   | 0.85        |
| [1-2].Presenter practices the “coordination” skills sustainably at workplaces    | 0.67       | 0.843  | 0.76        |
| [2-1].Presenter transfers the “communication” skills appropriately at workplaces | 0.69       | 0.82   | 0.89        |
| [2-2].Presenter practices the “communication” skills sustainably at workplaces   | 0.71       | 0.79   | 0.77        |
| [3-1].Presenter transfers the “teamwork” skills appropriately at workplaces      | 0.683      | 0.679  | 0.711       |
| [3-2].Presenter practices the “teamwork” skills sustainably at workplaces        | 0.78       | 0.812  | 0.79        |
| [4-1].Presenter transfers the “leadership” skills appropriately at workplaces    | 0.72       | 0.77   | 0.849       |
| [4-2].Presenter practices the “leadership” skills sustainably at workplaces      | 0.83       | 0.74   | 0.816       |

Two facilitators for each small-group [n=11, either with 4:4:3, 4:4:3, 4:4:3, 5:3:3 ratio of physician: nurse: pharmacists] benchmarking presentation held in four rooms in two consecutive days.

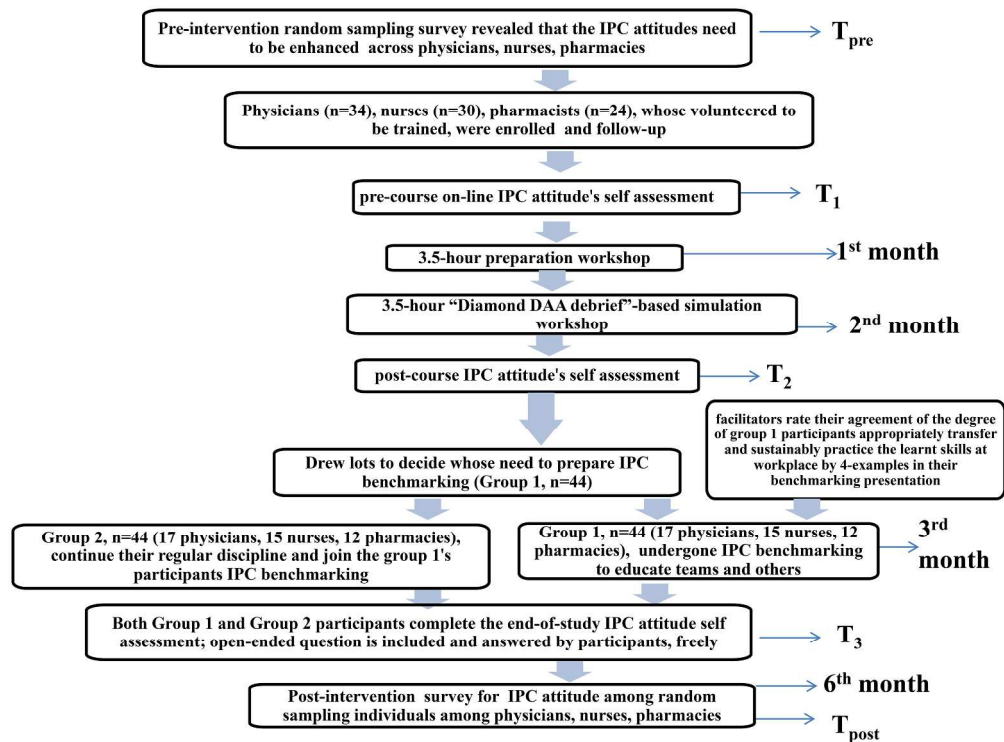

Fig. 1

245x181mm (300 x 300 DPI)



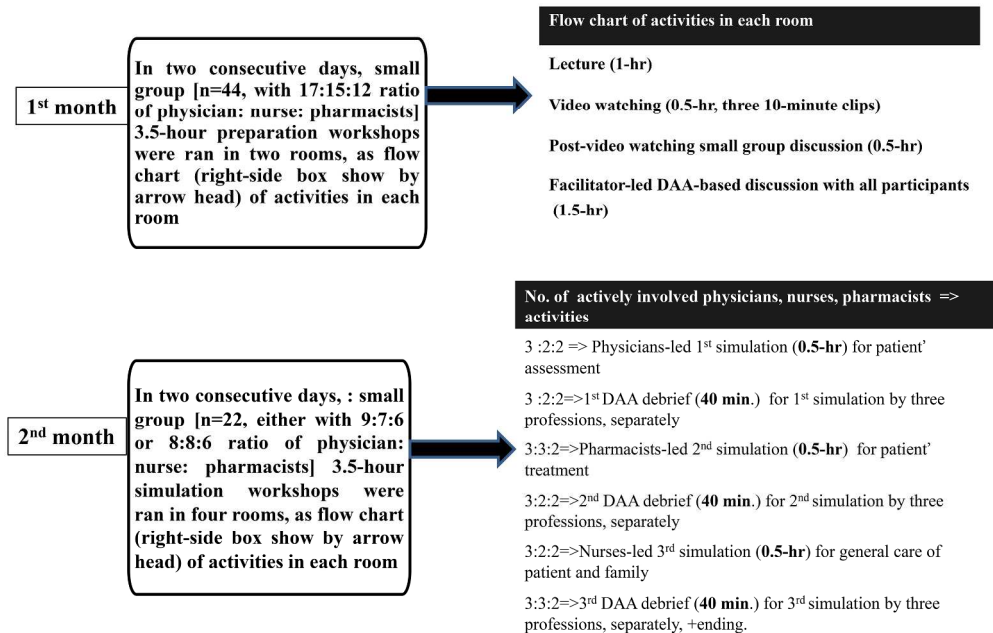

Fig. 2

248x157mm (300 x 300 DPI)

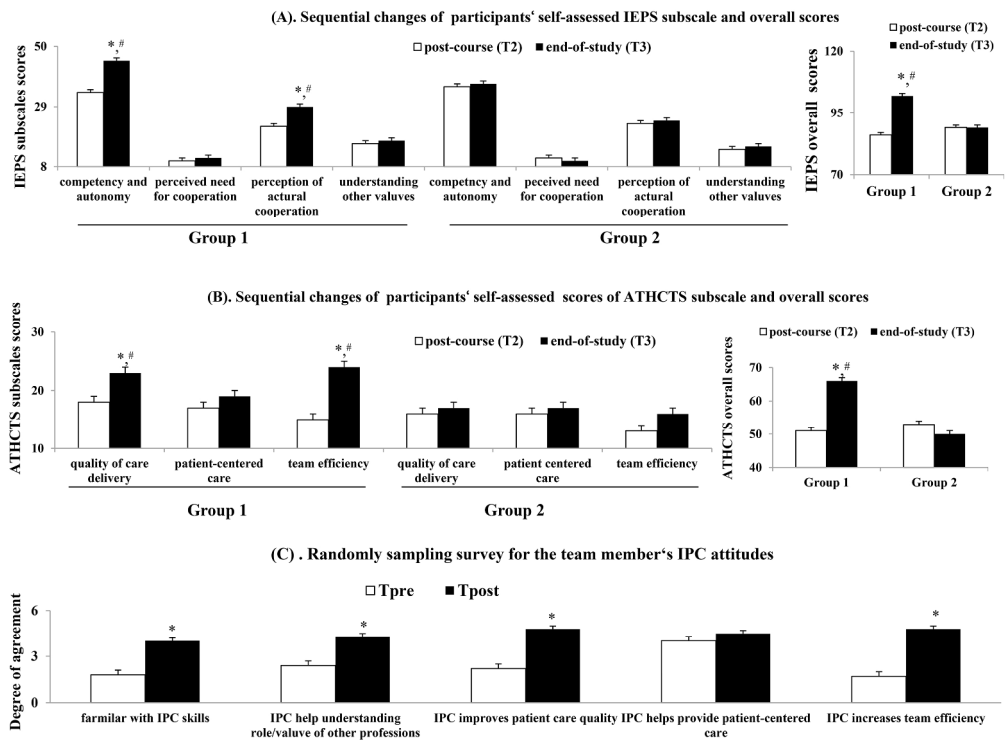

Fig. 3

250x184mm (300 x 300 DPI)

1  
2  
3  
4  
5  
6  
7  
8  
9  
10  
11  
12  
13  
14  
15  
16  
17  
18  
19  
20  
21  
22  
23  
24  
25  
26  
27  
28  
29  
30  
31  
32  
33  
34  
35  
36  
37  
38  
39  
40  
41  
42  
43  
44  
45  
46  
47

| <b>Supplement table 1 Interdisciplinary education perception scale (IEPS)</b>                                                                                                                                                                                                                                                                                                                                                                                                                                                                                                                                                                                                                                                                                                                                                                                                                                                                                                                                                    |                                                                                                                                                                                                                                                                                                                                                                                                                                                                                                                                                                                                                     |
|----------------------------------------------------------------------------------------------------------------------------------------------------------------------------------------------------------------------------------------------------------------------------------------------------------------------------------------------------------------------------------------------------------------------------------------------------------------------------------------------------------------------------------------------------------------------------------------------------------------------------------------------------------------------------------------------------------------------------------------------------------------------------------------------------------------------------------------------------------------------------------------------------------------------------------------------------------------------------------------------------------------------------------|---------------------------------------------------------------------------------------------------------------------------------------------------------------------------------------------------------------------------------------------------------------------------------------------------------------------------------------------------------------------------------------------------------------------------------------------------------------------------------------------------------------------------------------------------------------------------------------------------------------------|
| subclasses                                                                                                                                                                                                                                                                                                                                                                                                                                                                                                                                                                                                                                                                                                                                                                                                                                                                                                                                                                                                                       | statement                                                                                                                                                                                                                                                                                                                                                                                                                                                                                                                                                                                                           |
| competency and autonomy (8 items)                                                                                                                                                                                                                                                                                                                                                                                                                                                                                                                                                                                                                                                                                                                                                                                                                                                                                                                                                                                                | 1. Individuals in my profession are well-trained.<br>2. Individuals in my profession demonstrate a great deal of autonomy.<br>3. Individuals in my profession are very positive about their goals and objectives.<br>4. Individuals in my profession are very positive about their contributions and accomplishments.<br>5. Individuals in my profession trust each other’s professional judgment.<br>6. Individuals in my profession are extremely competent.<br>7. Individuals in other professions respect the work done by my profession.<br>8. Individuals in other professions think highly of my profession. |
| perceived need for cooperation (2 items)                                                                                                                                                                                                                                                                                                                                                                                                                                                                                                                                                                                                                                                                                                                                                                                                                                                                                                                                                                                         | 9. Individuals in my profession need to cooperate with other professions.<br>10. Individuals in my profession must depend upon the work of people in other professions.                                                                                                                                                                                                                                                                                                                                                                                                                                             |
| perception of actual cooperation (5 items)                                                                                                                                                                                                                                                                                                                                                                                                                                                                                                                                                                                                                                                                                                                                                                                                                                                                                                                                                                                       | 11. Individuals in my profession are able to work closely with individuals in other professions.<br>12. Individuals in my profession are willing to share information and resources with other professionals.<br>13. Individuals in my profession have good relations with people in other professions.<br>14. Individuals in my profession think highly of other related professions.<br>15. Individuals in my profession work well with each other.                                                                                                                                                               |
| understanding others value (3 items)                                                                                                                                                                                                                                                                                                                                                                                                                                                                                                                                                                                                                                                                                                                                                                                                                                                                                                                                                                                             | 16. Individuals in my profession have a higher status than individuals in other professions.<br>17. Individuals in my profession make every effort to understand the capabilities and contributions of other professions.<br>18. Individuals in other professions often seek the advice of people in my profession.                                                                                                                                                                                                                                                                                                 |
| Likert's Scale with 6 possible responses (1=Strongly Disagree, 2=Moderately Disagree, 3=Somewhat Disagree, 4=Somewhat Agree, 5=Moderately Agree, 6=Strongly Agree ); ** Higher scores represent more positive attitudes toward teamwork. “Competency and Autonomy” subscale measures how highly students respect their profession, in the sense that it is well taught and contributes significantly to improving the healthcare field, as well as to what extent they believe that other professions are respected in a similar fashion. “Perceived Need for Cooperation” reflects the responders' perceptions of the need for teamwork, which typically includes respecting and working well with other professions. “Perception of Actual Cooperation”, aims to reveal the responders’ perception of how their profession typically respects and works well with other professions. “Understanding Others’ Values” aims to reflect the degree of respect the responder has for contributions from all healthcare professions. |                                                                                                                                                                                                                                                                                                                                                                                                                                                                                                                                                                                                                     |

1  
2  
3  
4  
5  
6  
7  
8  
9  
10  
11  
12  
13  
14  
15  
16  
17  
18  
19  
20  
21  
22  
23  
24  
25  
26  
27  
28  
29  
30  
31  
32  
33  
34  
35  
36  
37  
38  
39  
40  
41  
42  
43  
44  
45  
46  
47

| <b>Supplement table 2 Attitudes Toward Interprofessional Health Care Teams Scale (ATIHCTS)</b>                                                              |                                                                                                                                                                                                                                                                                                                                                                                                                                                                                                                                                                                        |
|-------------------------------------------------------------------------------------------------------------------------------------------------------------|----------------------------------------------------------------------------------------------------------------------------------------------------------------------------------------------------------------------------------------------------------------------------------------------------------------------------------------------------------------------------------------------------------------------------------------------------------------------------------------------------------------------------------------------------------------------------------------|
| Subscales                                                                                                                                                   | STATEMENT                                                                                                                                                                                                                                                                                                                                                                                                                                                                                                                                                                              |
| quality of care delivery<br>(5 items)                                                                                                                       | 1. Developing an inter-professional patient care plan is excessively time consuming.<br>2. The give and take among team members helps them make better patient care decisions.<br>3. The inter-professional approach makes the delivery of care more efficient.<br>4. Developing a patient care plan with other team members avoids errors in delivering care.<br>5. The inter-professional approach improves the quality of care to patients                                                                                                                                          |
| patient-centered care<br>(4 items)                                                                                                                          | 6. Patients receiving inter-professional care are more likely than others to be treated as whole persons.<br>7. Health professionals working as teams are more responsive than others to the emotional and financial needs of patients<br>8. The inter-professional approach permits health professionals to meet the needs of family caregivers as well as patients.<br>9. Hospital patients who receive inter-professional team care are better prepared for discharge than other patients.                                                                                          |
| team efficiency<br>(5 items)                                                                                                                                | 10. Working in an inter-professional manner unnecessarily complicates things most of the time.<br>11. Working in an inter-professional environment keeps most health professionals enthusiastic and interested in their jobs.<br>12. In most instances, the time required for inter-professional consultations could be better spent in other ways<br>13. Having to report observations to a team helps team members better understand the work of other health professionals.<br>14. Team meetings foster communication among team members from different professions or disciplines. |
| * Likert's Scale with 5 possible responses (1=Strongly Disagree through 5=Strongly Agree);*Higher scores represent more positive attitudes toward teamwork. |                                                                                                                                                                                                                                                                                                                                                                                                                                                                                                                                                                                        |

**Supplement Table 3 Items of the facilitators' agreement to group 1 participant's degree of appropriately transfer and sustainably practice of the learnt IPC skills, including coordination, communication, teamwork and leadership, at workplaces according to 4 real examples in their benchmarking presentation**

|           |                                                                                  |
|-----------|----------------------------------------------------------------------------------|
| Example 1 | [1-1].Presenter transfers the “coordination” skills appropriately at workplaces  |
|           | [1-2].Presenter practices the “coordination” skills sustainably at workplaces    |
| Example 2 | [2-1].Presenter transfers the “communication” skills appropriately at workplaces |
|           | [2-2].Presenter practices the “communication” skills sustainably at workplaces   |
| Example 3 | [3-1].Presenter transfers the “teamwork” skills appropriately at workplaces      |
|           | [3-2].Presenter practices the “teamwork” skills sustainably at workplaces        |
| Example 4 | [4-1].Presenter transfers the “leadership” skills appropriately at workplaces    |
|           | [4-2].Presenter practices the “leadership” skills sustainably at workplaces      |

Presenters were asked to present their four examples according to the sequences of items listed above. Sequentially, benchmarking' example 1 for item 1-1&1-2, example 2 for item 2-1&2-2, example 3 for item 3-1&3-2, example 4 for item 4-1&4-2 were presented. Facilitator's degree of agreement to presenters' performance were rated by 5-point Likerts scale-based (1=strongly disagree, 2=disagree, 3=neutral, 4=agree, 5=strongly agree); By consensus meeting, facilitators rate their agreement to the items 1-1 and 1-2 according to the example 1 of presenter, items 2-2 and 2-2 from example 2, item 3-1 and 3-2 from example 3, items 4-1 and 4-2 from example 4 in separate rooms.

**Supplement table 4 Items of questionnaires used for pre-intervention and post-intervention random sampling survey of IPC attitudes**

1. Are you familiar with IPC skills?
2. Do you agree that IPC helps understanding the role of other healthcare team members?
3. Do you agree that IPC improves quality of patient care?
4. Do you agree that IPC improves patient-centered care?
5. Do you agree that IPC improves team efficiency?

\* Likert's Scale with 5 possible responses (1=Strongly Disagree through 5=Strongly Agree);\* Higher scores represent better IPC attitudes

Peer review only

STROBE Statement—Checklist of items that should be included in reports of *cohort studies*  
 Title: **Simulation based inter-professional education to improve attitudes towards collaborative practice**

|                              | Item No | Recommendation                                                                                                                                                                                    | Page No. |
|------------------------------|---------|---------------------------------------------------------------------------------------------------------------------------------------------------------------------------------------------------|----------|
| <b>Title and abstract</b>    | 1       | (a) Indicate the study's design with a commonly used term in the title or the abstract                                                                                                            | Page 1   |
|                              |         | (b) Provide in the abstract an informative and balanced summary of what was done and what was found                                                                                               | Page 2   |
| <b>Introduction</b>          |         |                                                                                                                                                                                                   |          |
| Background/rationale         | 2       | Explain the scientific background and rationale for the investigation being reported                                                                                                              | Page 4   |
| Objectives                   | 3       | State specific objectives, including any prespecified hypotheses                                                                                                                                  | Page 4   |
| <b>Methods</b>               |         |                                                                                                                                                                                                   |          |
| Study design                 | 4       | Present key elements of study design early in the paper                                                                                                                                           | Page 6   |
| Setting                      | 5       | Describe the setting, locations, and relevant dates, including periods of recruitment, exposure, follow-up, and data collection                                                                   | Page 6   |
| Participants                 | 6       | (a) Give the eligibility criteria, and the sources and methods of selection of participants. Describe methods of follow-up                                                                        | Page 6   |
|                              |         | (b) For matched studies, give matching criteria and number of exposed and unexposed                                                                                                               | Page 6   |
| Variables                    | 7       | Clearly define all outcomes, exposures, predictors, potential confounders, and effect modifiers. Give diagnostic criteria, if applicable                                                          | Page 8-9 |
| Data sources/<br>measurement | 8*      | For each variable of interest, give sources of data and details of methods of assessment (measurement). Describe comparability of assessment methods if there is more than one group              | Page 8-9 |
| Bias                         | 9       | Describe any efforts to address potential sources of bias                                                                                                                                         | Page 9   |
| Study size                   | 10      | Explain how the study size was arrived at                                                                                                                                                         | Page 6   |
| Quantitative variables       | 11      | Explain how quantitative variables were handled in the analyses. If applicable, describe which groupings were chosen and why                                                                      | Page 8-9 |
| Statistical methods          | 12      | (a) Describe all statistical methods, including those used to control for confounding                                                                                                             | Page 9   |
|                              |         | (b) Describe any methods used to examine subgroups and interactions                                                                                                                               |          |
|                              |         | (c) Explain how missing data were addressed                                                                                                                                                       | Page 9   |
|                              |         | (d) If applicable, explain how loss to follow-up was addressed                                                                                                                                    | Page 9   |
|                              |         | (e) Describe any sensitivity analyses                                                                                                                                                             | Page 9   |
| <b>Results</b>               |         |                                                                                                                                                                                                   |          |
| Participants                 | 13*     | (a) Report numbers of individuals at each stage of study—eg numbers potentially eligible, examined for eligibility, confirmed eligible, included in the study, completing follow-up, and analysed | Page 11  |
|                              |         | (b) Give reasons for non-participation at each stage                                                                                                                                              | Page 11  |

|                          |     |                                                                                                                                                                                                              |            |
|--------------------------|-----|--------------------------------------------------------------------------------------------------------------------------------------------------------------------------------------------------------------|------------|
|                          |     | (c) Consider use of a flow diagram                                                                                                                                                                           | Page 11    |
| Descriptive data         | 14* | (a) Give characteristics of study participants (eg demographic, clinical, social) and information on exposures and potential confounders                                                                     | Page 12    |
|                          |     | (b) Indicate number of participants with missing data for each variable of interest                                                                                                                          | Page 12    |
|                          |     | (c) Summarise follow-up time (eg, average and total amount)                                                                                                                                                  | Page 12    |
| Outcome data             | 15* | Report numbers of outcome events or summary measures over time                                                                                                                                               | Page 13    |
| Main results             | 16  | (a) Give unadjusted estimates and, if applicable, confounder-adjusted estimates and their precision (eg, 95% confidence interval). Make clear which confounders were adjusted for and why they were included | Page 13    |
|                          |     | (b) Report category boundaries when continuous variables were categorized                                                                                                                                    | Page 13    |
|                          |     | (c) If relevant, consider translating estimates of relative risk into absolute risk for a meaningful time period                                                                                             | Page 13    |
| Other analyses           | 17  | Report other analyses done—eg analyses of subgroups and interactions, and sensitivity analyses                                                                                                               | Page 13    |
| <b>Discussion</b>        |     |                                                                                                                                                                                                              |            |
| Key results              | 18  | Summarise key results with reference to study objectives                                                                                                                                                     | Page 14    |
| Limitations              | 19  | Discuss limitations of the study, taking into account sources of potential bias or imprecision. Discuss both direction and magnitude of any potential bias                                                   | Page 14-16 |
| Interpretation           | 20  | Give a cautious overall interpretation of results considering objectives, limitations, multiplicity of analyses, results from similar studies, and other relevant evidence                                   | Page 14-16 |
| Generalisability         | 21  | Discuss the generalisability (external validity) of the study results                                                                                                                                        | Page 14-16 |
| <b>Other information</b> |     |                                                                                                                                                                                                              |            |
| Funding                  | 22  | Give the source of funding and the role of the funders for the present study and, if applicable, for the original study on which the present article is based                                                | Page 17    |

\*Give information separately for exposed and unexposed groups.

**Note:** An Explanation and Elaboration article discusses each checklist item and gives methodological background and published examples of transparent reporting. The STROBE checklist is best used in conjunction with this article (freely available on the Web sites of PLoS Medicine at <http://www.plosmedicine.org/>, Annals of Internal Medicine at <http://www.annals.org/>, and Epidemiology at <http://www.epidem.com/>). Information on the STROBE Initiative is available at <http://www.strobe-statement.org>.



# BMJ Open

## Simulation based inter-professional education to improve attitudes towards collaborative practice: a prospective comparative pilot study in a Chinese medical center

|                                 |                                                                                                                                                                                                                                                                                                                                       |
|---------------------------------|---------------------------------------------------------------------------------------------------------------------------------------------------------------------------------------------------------------------------------------------------------------------------------------------------------------------------------------|
| Journal:                        | <i>BMJ Open</i>                                                                                                                                                                                                                                                                                                                       |
| Manuscript ID                   | bmjopen-2016-015105.R2                                                                                                                                                                                                                                                                                                                |
| Article Type:                   | Research                                                                                                                                                                                                                                                                                                                              |
| Date Submitted by the Author:   | 17-Aug-2017                                                                                                                                                                                                                                                                                                                           |
| Complete List of Authors:       | Yang, Ling-Yu; Medical Education<br>Yang, Ying-Ying<br>Huang, Chia-Chang; Clinical skill training center<br>Liang, Jen-Feng; Medical education<br>Lee, Fa-Yauh; Taipei VGH<br>Cheng, Hao-Min; Divison of faculty development<br>Huang, Chin-Chou; Division of Clinical skills Training Center<br>Kao, Shou-Yen; Taipei VGH, Professor |
| <b>Primary Subject Heading</b>: | Medical education and training                                                                                                                                                                                                                                                                                                        |
| Secondary Subject Heading:      | Communication                                                                                                                                                                                                                                                                                                                         |
| Keywords:                       | nurses, pharmacists, inter-professional collaboration, interdisciplinary education perception, attitudes towards health care teams                                                                                                                                                                                                    |
|                                 |                                                                                                                                                                                                                                                                                                                                       |

SCHOLARONE™  
Manuscripts

Only

1  
2  
3 Simulation based inter-professional education to improve attitudes towards  
4 collaborative practice: a prospective comparative pilot study in a Chinese medical  
5 center  
6  
7

8  
9  
10 Ling-Yu Yang,<sup>2</sup> Ying-Ying Yang,<sup>1,3,5</sup> Chia-Chang Huang,<sup>1,3,5</sup> Jen-Feng Liang,<sup>2,5</sup>  
11 Fa-Yauh Lee,<sup>3,5</sup> Hao Min Cheng,<sup>2,5</sup> Chin-Chou Huang,<sup>1,3,5</sup> Shou-Yen Kao,<sup>3,5</sup>  
12

13  
14  
15 <sup>1</sup>Division of Clinical Skills Training, <sup>2</sup>Department of Medical Education, <sup>3</sup>Department  
16 of Medicine, <sup>4</sup>Taipei Veterans General Hospital, Taipei, Taiwan  
17

18 <sup>5</sup>Department of Medicine, National Yang-Ming University, Taipei, Taiwan  
19

20 **Correspondence to**

21 Ying-Ying Yang; [yangyy@vghtpe.gov.tw](mailto:yangyy@vghtpe.gov.tw)  
22  
23  
24  
25  
26  
27  
28  
29  
30  
31  
32  
33  
34  
35  
36  
37  
38  
39  
40  
41  
42  
43  
44  
45  
46  
47  
48  
49  
50  
51  
52  
53  
54  
55  
56  
57  
58  
59  
60

**ABSTRACT**

**Objectives:** Inter-professional education (IPE) builds inter-professional collaboration (IPC) attitude/skills of health professionals. This interventional IPE program evaluates whether benchmarking sharing can successfully cultivate seed instructors responsible for improving their team members' IPC attitudes.

**Design:** Prospective, pre-post comparative cross-sectional pilot study.

**Setting/participants:** 34 physicians, 30 nurses and 24 pharmacists, who volunteered to be trained as seed instructors participated in 3.5-hr preparation and 3.5-hr simulation workshops. Then, participants (n=88) drew lots to decide 44 presenters, half of each profession, who needed to prepare IPC benchmarking and formed Group 1. The remaining participants formed Group 2 (regular). Facilitators rated the Group 1 participants' degree of appropriate transfer and sustainable practice of the learnt IPC skills in the workplace according to successful IPC examples in their benchmarking sharing.

**Results:** For the three professions, improvement in IPC attitude was identified by sequential increase in the post-course (2<sup>nd</sup> month, T<sub>2</sub>) and end-of-study (3<sup>rd</sup> month, T<sub>3</sub>) Interdisciplinary Education Perception Scale (IEPS) and Attitudes Towards Health Care Teams Scale (ATHCTS) scores, compared to pre-course (1<sup>st</sup> month, T<sub>1</sub>) scores. By IEPS and ATHCTS-based assessment, the degree of sequential improvements in IPC attitude was found to be higher among nurses and pharmacists than in physicians. In benchmarking sharing, the facilitators' agreement about the degree of participant's appropriate transfer and sustainable practice learnt "communication and teamwork" skills in the workplace were significantly higher among pharmacists and nurses than among physicians. The post-intervention random sampling survey (6<sup>th</sup> month, T<sub>post</sub>) found that the IPC attitude of three professions improved after on-site IPC skill promotion by new program-trained seed instructors within teams.

**Conclusions:** Addition of benchmark sharing to a diamond-based IPE simulation program enhances participants' IPC attitudes, self-reflection, workplace transfer and practice of the learnt skills. Furthermore, IPC promotion within teams by newly trained seed instructors improved the IPC attitudes across all three professions.

**Keywords:** nurses, pharmacists, inter-professional collaboration, interdisciplinary education perception, attitudes towards health care teams

**Strengths and limitations of this study**

- This pilot study describes the experiences of a prospective cross-sectional cohort of physicians, nurses and pharmacists who volunteered to receive serial benchmarking-enhanced diamond-based IPE simulation program for cultivating them as seed instructors to improve team members' IPC attitude.
- In our IPE program, IPC benchmarking sharing was implemented to enhance participants' continual motivation to self-reflect and to promote IPC among team members.
- Using IEPS and ATHCTS, our study reveals the significant improvements in participant's motivation and IPC attitude across three professions after receiving training with our new IPE program.
- Through IPC benchmarking presentation, participants' appropriate transfer and sustainable practice of the learnt IPC skills in the workplace was evaluated.
- Although participant's satisfaction with the new program and the degree of improvement in participant's competencies were not evaluated in our study.
- At this stage, the use of newly acquired knowledge or skills by medical professionals of our institution was not evaluated in our study.
- These results were limited to experience in one institution; the degree to which this can be extrapolated to IPE training in other institutions is not known.

## INTRODUCTION

Inter-professional education (IPE) aims to improve the coordination, communication, teamwork and leadership skills of health professionals by learning with, from and about each other.<sup>1</sup> Two key families of learning theory behaviorism and constructivism were applied to the curriculum design of IPE.<sup>2,3</sup> It has been reported that learning theories for IPE are not mutually exclusive. In fact, theorists agree that inter-professional learning “by doing” combined with learner centeredness is the key.<sup>2,3</sup> Health care simulations are recognized as an ideal vehicle for IPE.<sup>4</sup> Today's patients have complex chronic health issues that need inter-professional collaboration (IPC) in order to delivery well-coordinated, high-quality and patient-centered care.<sup>5,6</sup> Simulation-enhanced IPE helps the development of a health professional's IPC skills and these are very important when managing critical clinical situations.<sup>7</sup>

Baker, *et al.* reported that 2-hour cardiac resuscitation/intravenous access simulation-based IPE prepared medical students, nursing students and junior medical residents for their future as practitioners.<sup>8</sup> In their study, immediate attitudinal scores and responses by Interdisciplinary Education Perception Scale (IEPS) survey were consistently positive among both medical and nursing students.<sup>8</sup> Undre *et al.* reported that, using technical and human factors rating scales, trainers and multidisciplinary trainees assessed the crisis scenarios-based simulation training favorably, especially in technical skills.<sup>9</sup> Paige *et al.* revealed that 3-hour simulation-based interdisciplinary operating room IPE significantly improve the trainees' self-efficacy teamwork performance in role clarity, anticipatory response, cross monitoring, team cohesion and interaction.<sup>10</sup> In Vyas *et al.* study, using the team building and inter-professional communications survey, pharmacy student's reported that semi-urgent situations simulation-based IPE increased their understanding of professional roles and the importance of inter-professional communication.<sup>11</sup>

In Estis *et al.* study, using an attitudinal survey, speech language pathology, cardio-respiratory care and nursing students reported that simulation-based IPE enhanced their knowledge of medical professional roles/responsibilities and teamwork skills of caring for tracheostomy patients with speaking valves.<sup>12</sup> Nevertheless, participants in the Estis *et al.* study suggested that pre-simulation training and more structural interaction during the debriefing phase were likely to enhance effective of the IPE.<sup>12</sup> Specifically, Watters *et al.* implemented a debrief diamond, following description-analysis-application steps, during a 1-day simulation IPE course.<sup>13</sup> The standardized debrief diamond was designed to allow high-quality exploration of the non-technical aspects of a simulated scenario. The diamond is a two-sided prompt sheet: the first contains the scaffolding, with a series of constructed questions for each phase of the debriefing; while the second lays out the theory behind the questions and the process.<sup>13,14</sup> In Watters *et al.* study, using self-efficacy questionnaires, doctors and nurses reported that diamond-based simulation increased their confidence in “communication and teamwork” skills.<sup>13</sup> Darlow *et al.* reported that addition of a preparation workshop to their 11-hour IPE program resulted in improved attitudes towards inter-professional teams and inter-professional learning, as well as self-reported ability to function within an inter-professional team.<sup>15</sup>

Taken together, previous simulation-based IPE studies<sup>8-15</sup> were lacked post-course continuous training. In addition, there is an absence of long-term follow-up that allows the transference and sustainability of IPC practice to be assessed. Furthermore, there is an absence in these studies of opportunities for the participants

1  
2  
3  
4  
5  
6  
7  
8  
9  
10  
11  
12  
13  
14  
15  
16  
17  
18  
19  
20  
21  
22  
23  
24  
25  
26  
27  
28  
29  
30  
31  
32  
33  
34  
35  
36  
37  
38  
39  
40  
41  
42  
43  
44  
45  
46  
47  
48  
49  
50  
51  
52  
53  
54  
55  
56  
57  
58  
59  
60

to reflect on their training after a period of IPC practice. In 2014, a random sampling survey of three professions at our institution revealed that IPC attitudes of physician, nurses and pharmacists need to be improved (Figure 1).

It is important to develop feasible continuous IPE/IPC strategies to solve the problems of previous studies<sup>8-15</sup> and of our survey. Therefore, our education committee targeted these three professions and organized a new IPE program characterized by pre-simulation training, post-course continuous training, and immediate plus delayed IPC attitude assessments. Additionally, post-training e-learning platform and IPC benchmarking sharing provide an opportunity for additional/deepening learning of inter-professional problem solving skills. Benchmarking sharing, a good indicator of organizational seriousness about quality, is a continuous quality improvement approach. Healthcare benchmarking sharing provides opportunities for inter-professional participants to learn from others and develop innovative collaborative clinical care.<sup>16,17</sup> This pilot intervention intentionally evaluates its impact on cultivating new health professionals as seed instructors to promote IPC within their teams.

## METHODS

### Participants and setting

Health professionals having more than 1 year but less than 4 years of clinical work experience were invited to participate in this study (Figure 1). The participants volunteering to be trained (n=94) were invited to join the 2015 pilot benchmarking-enhanced diamond-based IPE simulation courses to improve their IPC attitudes. After excluding six participants due to incomplete questionnaires, a total of n=88 individuals were included in this study. They consisted of physicians (n=34), nurses (n=30) and pharmacists (n=24). After a brief introduction, the participants were asked to complete the pre-course (T<sub>1</sub>) on-line IPC attitude assessment, which consisted of Interdisciplinary Education Perception Scale (IEPS) and the Attitudes Toward Health Care Teams Scale (ATHCTS) (supplement Tables 1-2).

| Supplement table 1 Interdisciplinary education perception scale (IEPS)                                                                                                                                                                                                                                                                                                                                                                                                                                                                                                                                                                                                                                                                                                                                                                                                                                                                                                                                                          |                                                                                                                           |
|---------------------------------------------------------------------------------------------------------------------------------------------------------------------------------------------------------------------------------------------------------------------------------------------------------------------------------------------------------------------------------------------------------------------------------------------------------------------------------------------------------------------------------------------------------------------------------------------------------------------------------------------------------------------------------------------------------------------------------------------------------------------------------------------------------------------------------------------------------------------------------------------------------------------------------------------------------------------------------------------------------------------------------|---------------------------------------------------------------------------------------------------------------------------|
| subclasses                                                                                                                                                                                                                                                                                                                                                                                                                                                                                                                                                                                                                                                                                                                                                                                                                                                                                                                                                                                                                      | statement                                                                                                                 |
| competency and autonomy (8 items)                                                                                                                                                                                                                                                                                                                                                                                                                                                                                                                                                                                                                                                                                                                                                                                                                                                                                                                                                                                               | 1. Individuals in my profession are well-trained.                                                                         |
|                                                                                                                                                                                                                                                                                                                                                                                                                                                                                                                                                                                                                                                                                                                                                                                                                                                                                                                                                                                                                                 | 2. Individuals in my profession demonstrate a great deal of autonomy.                                                     |
|                                                                                                                                                                                                                                                                                                                                                                                                                                                                                                                                                                                                                                                                                                                                                                                                                                                                                                                                                                                                                                 | 3. Individuals in my profession are very positive about their goals and objectives.                                       |
|                                                                                                                                                                                                                                                                                                                                                                                                                                                                                                                                                                                                                                                                                                                                                                                                                                                                                                                                                                                                                                 | 4. Individuals in my profession are very positive about their contributions and accomplishments.                          |
|                                                                                                                                                                                                                                                                                                                                                                                                                                                                                                                                                                                                                                                                                                                                                                                                                                                                                                                                                                                                                                 | 5. Individuals in my profession trust each other's professional judgment.                                                 |
|                                                                                                                                                                                                                                                                                                                                                                                                                                                                                                                                                                                                                                                                                                                                                                                                                                                                                                                                                                                                                                 | 6. Individuals in my profession are extremely competent.                                                                  |
|                                                                                                                                                                                                                                                                                                                                                                                                                                                                                                                                                                                                                                                                                                                                                                                                                                                                                                                                                                                                                                 | 7. Individuals in other professions respect the work done by my profession.                                               |
|                                                                                                                                                                                                                                                                                                                                                                                                                                                                                                                                                                                                                                                                                                                                                                                                                                                                                                                                                                                                                                 | 8. Individuals in other professions think highly of my profession.                                                        |
| perceived need for cooperation (2 items)                                                                                                                                                                                                                                                                                                                                                                                                                                                                                                                                                                                                                                                                                                                                                                                                                                                                                                                                                                                        | 9. Individuals in my profession need to cooperate with other professions.                                                 |
|                                                                                                                                                                                                                                                                                                                                                                                                                                                                                                                                                                                                                                                                                                                                                                                                                                                                                                                                                                                                                                 | 10. Individuals in my profession must depend upon the work of people in other professions.                                |
| perception of actual cooperation (5 items)                                                                                                                                                                                                                                                                                                                                                                                                                                                                                                                                                                                                                                                                                                                                                                                                                                                                                                                                                                                      | 11. Individuals in my profession are able to work closely with individuals in other professions.                          |
|                                                                                                                                                                                                                                                                                                                                                                                                                                                                                                                                                                                                                                                                                                                                                                                                                                                                                                                                                                                                                                 | 12. Individuals in my profession are willing to share information and resources with other professionals.                 |
|                                                                                                                                                                                                                                                                                                                                                                                                                                                                                                                                                                                                                                                                                                                                                                                                                                                                                                                                                                                                                                 | 13. Individuals in my profession have good relations with people in other professions.                                    |
|                                                                                                                                                                                                                                                                                                                                                                                                                                                                                                                                                                                                                                                                                                                                                                                                                                                                                                                                                                                                                                 | 14. Individuals in my profession think highly of other related professions.                                               |
|                                                                                                                                                                                                                                                                                                                                                                                                                                                                                                                                                                                                                                                                                                                                                                                                                                                                                                                                                                                                                                 | 15. Individuals in my profession work well with each other.                                                               |
| understanding others value (3 items)                                                                                                                                                                                                                                                                                                                                                                                                                                                                                                                                                                                                                                                                                                                                                                                                                                                                                                                                                                                            | 16. Individuals in my profession have a higher status than individuals in other professions.                              |
|                                                                                                                                                                                                                                                                                                                                                                                                                                                                                                                                                                                                                                                                                                                                                                                                                                                                                                                                                                                                                                 | 17. Individuals in my profession make every effort to understand the capabilities and contributions of other professions. |
|                                                                                                                                                                                                                                                                                                                                                                                                                                                                                                                                                                                                                                                                                                                                                                                                                                                                                                                                                                                                                                 | 18. Individuals in other professions often seek the advice of people in my profession.                                    |
| Likert's Scale with 6 possible responses (1=Strongly Disagree, 2=Moderately Disagree, 3=Somewhat Disagree, 4=Somewhat Agree, 5=Moderately Agree, 6=Strongly Agree); ** Higher scores represent more positive attitudes toward teamwork. "Competency and Autonomy" subscale measures how highly students respect their profession, in the sense that it is well taught and contributes significantly to improving the healthcare field, as well as to what extent they believe that other professions are respected in a similar fashion. "Perceived Need for Cooperation" reflects the responders' perceptions of the need for teamwork, which typically includes respecting and working well with other professions. "Perception of Actual Cooperation", aims to reveal the responders' perception of how their profession typically respects and works well with other professions. "Understanding Others' Values" aims to reflect the degree of respect the responder has for contributions from all healthcare professions. |                                                                                                                           |

| Supplement table 2 Attitudes Toward Interprofessional Health Care Teams Scale (ATIHCTS)                                                                     |                                                                                                                             |
|-------------------------------------------------------------------------------------------------------------------------------------------------------------|-----------------------------------------------------------------------------------------------------------------------------|
| Subscales                                                                                                                                                   | STATEMENT                                                                                                                   |
| quality of care delivery<br>(5 items)                                                                                                                       | 1. Developing an inter-professional patient care plan is excessively time consuming.                                        |
|                                                                                                                                                             | 2. The give and take among team members helps them make better patient care decisions.                                      |
|                                                                                                                                                             | 3. The inter-professional approach makes the delivery of care more efficient.                                               |
|                                                                                                                                                             | 4. Developing a patient care plan with other team members avoids errors in delivering care.                                 |
|                                                                                                                                                             | 5. The inter-professional approach improves the quality of care to patients                                                 |
| patient-centered care<br>(4 items)                                                                                                                          | 6. Patients receiving inter-professional care are more likely than others to be treated as whole persons.                   |
|                                                                                                                                                             | 7. Health professionals working as teams are more responsive than others to the emotional and financial needs of patients   |
|                                                                                                                                                             | 8. The inter-professional approach permits health professionals to meet the needs of family caregivers as well as patients. |
|                                                                                                                                                             | 9. Hospital patients who receive inter-professional team care are better prepared for discharge than other patients.        |
| team efficiency<br>(5 items)                                                                                                                                | 10. Working in an inter-professional manner unnecessarily complicates things most of the time.                              |
|                                                                                                                                                             | 11. Working in an inter-professional environment keeps most health professionals enthusiastic and interested in their jobs. |
|                                                                                                                                                             | 12. In most instances, the time required for inter-professional consultations could be better spent in other ways           |
|                                                                                                                                                             | 13. Having to report observations to a team helps team members better understand the work of other health professionals.    |
|                                                                                                                                                             | 14. Team meetings foster communication among team members from different professions or disciplines.                        |
| * Likert's Scale with 5 possible responses (1=Strongly Disagree through 5=Strongly Agree);*Higher scores represent more positive attitudes toward teamwork. |                                                                                                                             |

Each on-line self-assessment was numbered so that participants remained anonymous but their numbers could be used to match their pre-course (T<sub>1</sub>) self-assessment with post-course (T<sub>2</sub>) and end-of-study (T<sub>3</sub>) self-assessment (Figure 1). All participants continued with their usual professional clinical routine throughout the 3-month interventional study.

Taipei Veterans General Hospital (TVGH) is a 3000-bed medical center providing primary and tertiary care to active-duty and retired military personnel and their dependents, and the general public. In addition TVGH is the teaching hospital for several medical universities in Northern Taiwan. Between January 2015 and May 2016, we conducted a prospective cross-sectional comparative study at the high-fidelity clinical simulation and interactive learning center of TVGH; this center trains around 2500 staff each year. Ethical approval (2015-06-017CC) was obtained from the Ethics committee of our institution and care was taken to apply the World Medical Association Declaration of Helsinki principles to the research.

### **Diamond-based benchmarking-enhanced IPE simulation program**

Each participant attended a 3.5-hour preparation workshop (T<sub>1</sub>) in the first month of this study. Subsequently, a 3.5-hour simulation workshop was arranged for the participants during the second month (T<sub>2</sub>). At the end of the simulation workshop, participants drew lots to decide who needed to prepare for post-course IPC benchmarking at the third month (T<sub>3</sub>) of study (*i.e.*, who was in Group 1). In order to



1  
2  
3 maintain a fixed ratio (34:30:24) among the three professions (Figure 1), half  
4 (17:15:12) of the physicians, nurses and pharmacists were selected as the  
5 benchmarking group and the others as Group 2 (regular). All facilitators received  
6 serial sessions training in how to use the debrief diamond and to consent about how to  
7 rate their agreement about the degree of participants appropriate transfer and  
8 sustainable practice of the trained “coordination, communication, teamwork, and  
9 leadership” skills regarding IPC in the workplace using real examples in their  
10 benchmarking sharing. In particular, the Description-Analysis-Application (DAA)  
11 debrief diamond was used to involve participants in preparation (T1) and simulation  
12 (T2) workshops. The “description” step involved ‘description’ of each profession's  
13 IPC performance in the simulation scenario, along with more challenging “analysis”  
14 and “application” steps involving ‘how did participants feel about each profession's  
15 IPC performance in simulation scenario?’ and “how participants may apply the learnt  
16 knowledge from IPC simulation scenarios in their own clinical practice”.<sup>13,14</sup>  
17  
18  
19

### 20 *7-hour preparation and simulation workshop*

21 *-Preparation workshop (T<sub>1</sub>).* In accordance with previous study design,<sup>15</sup> two  
22 small-group preparation workshops were held on two consecutive days as shown in  
23 Figure 2. The simulated examples of IPC-based care from a previous study<sup>11</sup> were  
24 revised by educational committee and made into three video clips for IPE. They were,  
25 first, a simulation of a distracted wife and a 61-year-old dyspnea male who suffered  
26 from recurrent asthmatic attacks due to inappropriate home medication; second, a  
27 simulation of a 35-year-old anxious family, including a pregnant  
28 nausea/vomiting/abdominal pain female who needed the selection of suitable  
29 anti-emetics and a pediatrics/gynecology consultation in an ER setting and, finally,  
30 a simulation of a 57-year-old chest pain male with a distracted son and with the wrong  
31 allergy and ID labeling on his arm band, as well as unlocked bed in ICU setting.  
32 These 10-minutes clips provided a basis for post-video viewing discussion that were  
33 led by inter-professional facilitators following a Diamond DAA debriefing (1-hour);  
34 these target the role and value of the IPC healthcare team involved in the simulated  
35 clinical scenarios presented in the three videos.<sup>13,14</sup>  
36  
37

38 *-Simulation workshop (T<sub>2</sub>).* In our simulation centers, four small-group  
39 workshops were held in four rooms within two consecutive days (Figure 2). Using the  
40 clinical scenario outlined below, workshops were led by well-trained IPE facilitators  
41 from dietetics, social workers and respiratory therapists. This scenario, which  
42 incorporates multi-disciplinary care, was modified by a previous study<sup>12</sup> and had a dry  
43 run before formally being used. A patient scenario involving Mr. Jason was developed  
44 collaboratively by the faculty members of the aforementioned professions.  
45 Participants were given the following information. Mr. Jason has a history of chronic  
46 obstructive pulmonary disease (COPD), smokes 60 packs per year of cigarettes and  
47 has hypertension, diabetes, coronary artery disease and atrial fibrillation. He has been  
48 admitted for acute exacerbation of his COPD five times in the past one year. Home  
49 medication includes aspirin, a calcium channel blocker, mycolytic agents, inhalation  
50 corticosteroid/bronchodilator and subcutaneous administrated insulin. Mr. Jason was  
51 admitted 3 weeks ago for emergency coronary artery bypass grafting surgery.  
52 Although there has been aggressive management with regular chest percussion, he has  
53 had difficulty being weaned from the ventilator due to poor sputum expectation and  
54 malnutrition. The primary care teams now are considering a tracheostomy and  
55 intensive chest/nutrition therapy. His family members are at the bedside. During the  
56 simulation, a pre-set intubated high-fidelity SimMan® 3G simulator acted as the  
57  
58  
59  
60

1  
2  
3 patient and standardized patients (SPs) were used as his family. Then, the 3.5-hour  
4 workshops were ran (Figure 2).

5 Before the beginning of the simulation, the participants were presented with the  
6 case's name, age, gender, admission diagnosis and current medication/management. In  
7 the three simulation phases, the participants involved were expected to carry out  
8 assessment, treatments, and general care of the patients, collaboratively. Then, the  
9 participants began the post-simulation debriefing phase and reflected on the  
10 challenges, pitfalls, and successes that occurred within the simulation.

11 *The IPC benchmarking (T<sub>3</sub>) of the Group 1 participants.* As mentioned above, 17  
12 physicians, 15 nurses and 12 pharmacists formed Group 1 and these participants  
13 underwent IPC benchmarking sharing. Presenters were asked to give their four  
14 examples of appropriately transfer and sustainable practice learnt IPC skills in the  
15 workplace. Randomly, four small groups (n=11) with ratio (4:4:3, 4:4:3, 4:4:3 and  
16 5:3:3) of physician to nurse to pharmacists were presented in four rooms over two  
17 consecutive days. During benchmarking sharing, two facilitators rated their 5-point  
18 Likert-scale-based agreement to the presenters' degree of appropriate transfer and  
19 sustainable practice of the learnt IPC skills in the workspace according to their four  
20 success examples. In each room, 4 hours (240 minutes) were needed for 11 presenters  
21 to complete their 20-minutes presentation (15-min.)/discussion (5-min.). Each  
22 presentation was video recorded by teaching assistants (TAs) to help with continuous  
23 IPC promotion. With the agreement of the presenters, the TAs uploaded edited  
24 versions of the video to the e-learning platform. The Group 2 participants were asked  
25 to join this end-of-study (T<sub>3</sub>) IPC benchmarking sharing.

26 *-e-learning platform.* Both the Group 1 and Group 2 participants were invited to  
27 use a common IPE e-learning platform containing the aforementioned scenario,  
28 various Power-point presentations, the video used in the preparation/simulation  
29 workshop and the video from the IPC benchmarking to encourage self-directed  
30 learning.

### 31 **Measurements of IPC attitudes**

32 In our study, we measured participants' IPC attitudes with Interdisciplinary  
33 education perception scale<sup>18-20</sup> (IEPS, supplemental Table 1), Attitudes Toward Health  
34 Care Teams Scale<sup>21</sup> (ATHCTS, supplemental Table 2) and single-open-ended items  
35 descriptive feedback. IEPS is a 18-items scale that classified further into four  
36 subscales, including "Competency and Autonomy," "Perceived Need for Cooperation,"  
37 "Perception of Actual Cooperation" and "Understanding Others' Values". ATHCTS is  
38 a 20-item scale consisting of quality of care/process (14 items) and physician  
39 centrality (6 items) subscales'. Additionally, participants were asked to provide  
40 qualitative feedback freely by answering the single-open-ended question, "what is the  
41 one thing you are going to take away with you at the end of this course?" in the online  
42 post-courses self-assessment (T<sub>3</sub>). This question was designed to prompt a participant  
43 to reflect on their own learning during the course and allowed the program director  
44 to gather evidence on which elements within the courses seemed to be contributing the  
45 most to the learning experience.

### 46 **Pre-intervention (T<sub>pre</sub>) and Post-intervention (T<sub>post</sub>, 6<sup>th</sup> month) random sampling 47 survey of IPC attitudes (Figure 1)**

48 Using IPC core elements-based questionnaires (supplement Table 3), across the  
49 three professions, the effectiveness of the well-trained seed instructors was evaluated  
50

1  
2  
3 by comparing the differences between  $T_{pre}$  and  $T_{post}$  IPC attitude scores<sup>22-24</sup>.  
4

5 **Supplement table 3** IPC core elements-based questionnaires used for pre-intervention and  
6 post-intervention random sampling survey of IPC attitudes

- 7  
8 1. Are you familiar with IPC skills?  
9 2. Do you agree that IPC helps understanding the role of other healthcare team members?  
10 3. Do you agree that IPC improves quality of patient care?  
11 4. Do you agree that IPC improves patient-centered care?  
12 5. Do you agree that IPC improves team efficiency?

13 \* Likert's Scale with 5 possible responses (1=Strongly Disagree through 5=Strongly Agree);\*  
14 Higher scores represent better IPC attitudes

15  
16 In total, 132 valid  $T_{post}$  questionnaires were collected for comparison with  
17 another 132 valid  $T_{pre}$  questionnaires. These anonymous  $T_{pre}$  and  $T_{post}$  questionnaires  
18 were completed by random members sampled twice from the three professions,  
19 namely 51 physicians, 45 nurses and 36 pharmacists. In other words, the individuals  
20 who responded to the online IPC attitude survey might be but are not necessarily  
21 different between  $T_{pre}$  and  $T_{post}$  survey. Nonetheless, it is important to note that the  
22 enrolled participants in our interventional study were excluded from the sampling  
23 pool for  $T_{post}$  sampling survey.  
24

25 **Analysis**

26 Outcomes of our new training program were analyzed according to Kirkpatrick  
27 levels.<sup>25</sup> Since the IEPS and ATHCTS items are ordinal in nature, Wilcoxon's signed  
28 rank test was used to analyze each item. The means of the overall IEPS score and the  
29 four subscales were evaluated with the Student's two-tailed paired *t*-test for  
30 continuous measures, with the aim of detecting any differences between  $T_1$  and  $T_2$  as  
31 well as  $T_2$  and  $T_3$  time-points. Data from the IEPS and ATHCTS were matched by  
32 profession for analysis with one-way ANOVA or Mann-Whitney U test to detect the  
33 significant difference between among groups.  
34  
35  
36  
37  
38  
39  
40  
41  
42  
43  
44  
45  
46  
47  
48  
49  
50  
51  
52  
53  
54  
55  
56  
57  
58  
59  
60

## RESULTS

The baseline characteristics of the participants, including mean age, gender and clinical experiences, were similar across the physicians, nurses and pharmacist as can be seen in Table 1. A higher percentage of pharmacists (45%/43%) and nurses (35%/36%) having experience receiving previous IPE training and higher frequency of exposure to IPC meeting during their previous year of clinical works than physicians (15%/14%) (Table 1). In other words, in comparison with nurses and pharmacists, a lower percentage of physicians belong to the high-exposure (>80% exposure to monthly IPC meeting/1-year) group, which indicates the physician's had less experience with IPC meeting participation during their last 1-year of clinical work

**Table 1 Baseline characteristics of study population (n=88)**

|                                                                                                                                                                                                                                                                                            | Physicians<br>(n=34) | Nurses<br>(n=30) | Pharmacists<br>(n=24) |
|--------------------------------------------------------------------------------------------------------------------------------------------------------------------------------------------------------------------------------------------------------------------------------------------|----------------------|------------------|-----------------------|
| Age (years)                                                                                                                                                                                                                                                                                | 31.3± 2.7            | 29.1 ±4.8        | 30.5 ±3.6             |
| Female/male (No.)                                                                                                                                                                                                                                                                          | 30/4                 | 27/3             | 10/14                 |
| <b>Percentage of distribution of clinical-work-year of participants among groups</b>                                                                                                                                                                                                       |                      |                  |                       |
| 1-2/2-3/ 3-4 years (%)                                                                                                                                                                                                                                                                     | 76/14/10%            | 84/10/6%         | 69/20/11%             |
| <b>Percentage of distribution of participants with and without experience of receiving previous IPE training</b>                                                                                                                                                                           |                      |                  |                       |
| Percentage of distribution of participants with high/low frequency of exposure to IPC meeting during their last 1-yr of clinical work among groups                                                                                                                                         |                      |                  |                       |
| Percentage of ‡high-exposure participants                                                                                                                                                                                                                                                  | 14% <sup>#</sup>     | 36%              | 43%                   |
| Percentage of † low-exposure participants                                                                                                                                                                                                                                                  | 86% <sup>#</sup>     | 64%              | 57%                   |
| <small>#p&lt;0.01 vs. corresponding nurse's/pharmacist's group; ‡high-exposure participants indicated individual that participating more than 80% of monthly IPC meeting; †low-exposure participants indicated individual that participating less than 20% of monthly IPC meeting.</small> |                      |                  |                       |

1  
2  
3 ***Good internal consistency of the IEPS/ATHCTS and its subscales***

4 In this study, the Cronbach's alpha coefficients of IEPS overall scales (0.721),  
5 competency and autonomy subscales (0.69), Perceived need for cooperation subscales  
6 (0.73), Perception of actual cooperation subscales (0.85) and Understanding others  
7 values subscales (0.662) were good. Meanwhile, Cronbach's alpha of ATHCTS  
8 overall scales (0.719), Quality of care delivery subscales (0.683), Patient-centered  
9 care subscales (0.801) and Team efficiency subscales (0.724) were acceptable.  
10

11  
12 ***Nurses and pharmacists had greater improvement of IEPS and ATHCTS scores***  
13 ***than physicians***

14 The baseline IPC attitude, pre-course (T<sub>1</sub>) IEPS scores and pre-course (T<sub>1</sub>)  
15 ATHCTS scores were also similar across the physicians, nurses and pharmacists  
16 (Table 2). Compared to nurses, there were lower scores for the “competency and  
17 autonomy” and “understanding others values” basal IEPS subscales (T<sub>1</sub>) among the  
18 physicians. Similarly, also compared to nurses, there were lower scores for the  
19 “competency and autonomy” and “perception of actual cooperation” basal IEPS  
20 subscales (T<sub>1</sub>) among the pharmacists. Notably, the “competency and autonomy”  
21 subscale of IEPS score and the “team efficiency” subscale of the ATHCTS score  
22 (T<sub>2</sub>-T<sub>1</sub>) were increased by the 7-hour stepwise simulation-enhanced IPE course across  
23 three professions. In particular, the magnitude of increase in IEPS and ATHCTS  
24 scores were significantly greater among the nurses and pharmacist than among the  
25 physicians (Table 2). Clearly, pharmacists had greater increase in percent change of  
26 post-courses (T<sub>2</sub>) ATHCTS score from pre-courses (T<sub>1</sub>) score than nurses or  
27 physicians (Table 2).  
28  
29  
30  
31  
32  
33  
34  
35  
36  
37  
38  
39  
40  
41  
42  
43  
44  
45  
46  
47  
48  
49  
50  
51  
52  
53  
54  
55  
56  
57  
58  
59  
60

1  
2  
3  
4  
5  
6  
7  
8  
9  
10  
11  
12  
13  
14  
15  
16  
17  
18  
19  
20  
21  
22  
23  
24  
25  
26  
27  
28  
29  
30  
31  
32  
33  
34  
35  
36  
37  
38  
39  
40  
41  
42  
43  
44  
45  
46  
47  
48  
49

|                                                                                                                                                                                | Physicians (n=34)            |                               | Nurses (n=30)                |                               | Pharmacists (n=24)          |                               |
|--------------------------------------------------------------------------------------------------------------------------------------------------------------------------------|------------------------------|-------------------------------|------------------------------|-------------------------------|-----------------------------|-------------------------------|
|                                                                                                                                                                                | pre-course (T <sub>1</sub> ) | post-course (T <sub>2</sub> ) | pre-course (T <sub>1</sub> ) | post-course (T <sub>2</sub> ) | pre-course(T <sub>1</sub> ) | post-course (T <sub>2</sub> ) |
| <b>Total IEPS-18 scores [6-point scale]</b>                                                                                                                                    | 56±1.8 <sup>#</sup>          | 76±9.8 <sup>*,#</sup>         | 65±1.6                       | 91±1.2                        | 64±8                        | 91±4.7 <sup>*</sup>           |
| percent change of total IEPS post-course (T <sub>2</sub> ) score from pre-course (T <sub>1</sub> ) score                                                                       |                              | 18%                           |                              | 40% <sup>†</sup>              |                             | 42% <sup>†</sup>              |
| <b>IEPS subscales scores</b>                                                                                                                                                   |                              |                               |                              |                               |                             |                               |
| Competency and autonomy (8 items)                                                                                                                                              | 24±3.5 <sup>#</sup>          | 28±4.1 <sup>*,#</sup>         | 30±4.5                       | 39±7.2 <sup>*</sup>           | 22±5.4                      | 40±6.1 <sup>*</sup>           |
| Perceived need for cooperation (2 items)                                                                                                                                       | 7±2.2                        | 9±1.6                         | 8±2.9                        | 10±1.8                        | 9±3                         | 11±1.8                        |
| Perception of actual cooperation (5 items)                                                                                                                                     | 17±2.7                       | 24±3.7 <sup>*,#</sup>         | 15±1.2                       | 26±4.3 <sup>*</sup>           | 20±4.8                      | 23±2.5                        |
| Understanding others values (3 items)                                                                                                                                          | 8±2.4 <sup>#</sup>           | 15±2.9 <sup>*</sup>           | 12±3.8                       | 16±1.4                        | 13±2.1                      | 17±5.1 <sup>*</sup>           |
| <b>Total ATHCTS-14 [5-point scale]</b>                                                                                                                                         | 39±2.3                       | 48±5.4 <sup>*</sup>           | 38±2.6                       | 51±4.6                        | 32±3.7                      | 54±7.5                        |
| Percent change of total ATHCTS post-course (T <sub>2</sub> ) score from pre-course (T <sub>1</sub> ) score                                                                     |                              | 23%                           |                              | 34% <sup>†</sup>              |                             | 69% <sup>†</sup>              |
| <b>ATHCTS subscales scores</b>                                                                                                                                                 |                              |                               |                              |                               |                             |                               |
| Quality of care delivery (5 items)                                                                                                                                             | 14±2.2                       | 15±1.8 <sup>#</sup>           | 13±1.6                       | 18±4.1 <sup>*</sup>           | 12±4.2                      | 20±2.0 <sup>*</sup>           |
| Patient-centered care (4 items)                                                                                                                                                | 13±1.7                       | 18±2.1 <sup>*</sup>           | 15±7.4                       | 19±3.3                        | 11±2.8                      | 18±3.5 <sup>*</sup>           |
| Team efficiency (5 items)                                                                                                                                                      | 12±1.1                       | 15±3.7 <sup>*</sup>           | 10±1.9                       | 14±2.7 <sup>*</sup>           | 9±2.6                       | 16±4.1 <sup>*</sup>           |
| Data were expressed as mean±SD; * <i>p</i> <0.01 vs. pre-course scores; # <i>p</i> <0.01 vs. corresponding nurse's/pharmacists score's; † <i>p</i> <0.01 vs. physicians scores |                              |                               |                              |                               |                             |                               |

### ***Participants appropriately transfer and sustainable practice of the learnt IPC skills in the workplace after training***

Based on the real examples in IPC benchmarking presentations of Group 1 participants, the facilitators found that physicians were more appropriately able to transfer and sustainably practice of the learnt IPC “coordination and leadership” skills in the workspace than pharmacists and nurses (Table 3).

**Table 3 Comparison of facilitators' agreement to group 1 participant's degree of appropriate transfer and sustainable practice of the learnt IPC skills in workplaces according to four success examples in their benchmarking sharing**

|           |                                                                                  | Physicians<br>(n=17) | Nurses<br>(n=15)      | Pharmacists<br>(n=12) |
|-----------|----------------------------------------------------------------------------------|----------------------|-----------------------|-----------------------|
| Example 1 | [1-1].Presenter transfers the “coordination” skills appropriately in workplaces  | 4.3±0.64             | 3.6±0.7 <sup>#</sup>  | 3.9±0.8 <sup>#</sup>  |
|           | [1-2].Presenter practices the “coordination” skills sustainably in workplaces    | 4.6±0.54             | 3.3±0.21 <sup>#</sup> | 4.1±0.7 <sup>#</sup>  |
| Example 2 | [2-1].Presenter transfers the “communication” skills appropriately in workplaces | 3.9±0.52*            | 4.1±0.94              | 4.4±0.7               |
|           | [2-2].Presenter practices the “communication” skills sustainably in workplaces   | 3.3±0.71*            | 4.01±0.76             | 4.8±0.1               |
| Example 3 | [3-1].Presenter transfers the “teamwork” skills appropriately in workplaces      | 3.4±0.502*           | 4.5±0.46              | 4.1±0.9               |
|           | [3-2].Presenter practices the “teamwork” skills sustainably in workplaces        | 3.8±0.2*             | 4.7±0.1               | 4.5±0.6               |
| Example 4 | [4-1].Presenter transfers the “leadership” skills appropriately in workplaces    | 4.4±0.803            | 3.4±0.61 <sup>#</sup> | 4.0±0.5 <sup>#</sup>  |
|           | [4-2].Presenter practices the “leadership” skills sustainably in workplaces      | 4.7±0.4              | 3.0±0.3 <sup>#</sup>  | 3.8±0.4 <sup>#</sup>  |

Data were expressed as mean±SD; The IPC skills include coordination, communication, teamwork and leadership. Presenters were asked to present their four examples according to the sequences of items listed above. Sequentially, benchmarking' Example 1 for Item 1-1&1-2, example 2 for item 2-1&2-2, Example 3 for Item 3-1&3-2, Example 4 for Item 4-1&4-2 were presented. Facilitator's degree of agreement to presenters' performance were rated by 5-point Likerts scale-based (1=strongly disagree, 2=disagree, 3=neutral, 4=agree, 5=strongly agree); By consensus meeting, facilitators rate their agreement to the items 1-1 and 1-2 according to the Example 1 of presenter, Items 2-2 and 2-2 from Example 2, Item 3-1 and 3-2 from Example 3, Items 4-1 and 4-2 from Example 4 in separate rooms. The results are averaged data of ratings completed by two facilitators for the presenter's performance of each item in above checklist; #p<0.05 vs. physician's group; \*p<0.05 vs. nurse's/pharmacist's group.

In benchmarking sharing, the inter-rater reliability (Kappa statistics) of facilitators for the items used to assess whether participants were able to transfer and sustainably practice the learnt IPC skills was good (Table 4).

**Table 4 Inter-rater reliability of facilitators' ratings in benchmarking sharing of Group 1 participants**

|                                                                                  | Physicians | Nurses | Pharmacists |
|----------------------------------------------------------------------------------|------------|--------|-------------|
|                                                                                  | Kappa      | Kappa  | Kappa       |
| [1-1].Presenter transfers the “coordination” skills appropriately in workplaces  | 0.73       | 0.71   | 0.85        |
| [1-2].Presenter practices the “coordination” skills sustainably in workplaces    | 0.67       | 0.843  | 0.76        |
| [2-1].Presenter transfers the “communication” skills appropriately in workplaces | 0.69       | 0.82   | 0.89        |
| [2-2].Presenter practices the “communication” skills sustainably in workplaces   | 0.71       | 0.79   | 0.77        |
| [3-1].Presenter transfers the “teamwork” skills appropriately in workplaces      | 0.683      | 0.679  | 0.711       |
| [3-2].Presenter practices the “teamwork” skills sustainably in workplaces        | 0.78       | 0.812  | 0.79        |
| [4-1].Presenter transfers the “leadership” skills appropriately in workplaces    | 0.72       | 0.77   | 0.849       |
| [4-2].Presenter practices the “leadership” skills sustainably in workplaces      | 0.83       | 0.74   | 0.816       |

Two facilitators for each small-group [n=11, either with 4:4:3, 4:4:3, 4:4:3, 5:3:3 ratio of physician:nurse: pharmacists] benchmarking sharing held in four rooms over two consecutive days.

### ***Participants gave positive descriptive feedbacks to the trainings***

In open-ended questions at the end of our study, most participants reported that watching the IPE-specific video and discussing it, as well as viewing the uploaded videos on the e-learning platform, markedly encourage their motivation to improve their IPC attitude. Specifically, the participant's reported that the availability of an IPE/IPC-specific e-learning platform was able to improve the users' IPC attitude continuously by providing useful resources and instruction.

Selected completed feedback responses by the participants to the open-ended items of post-course self-assessment (T3) are listed below.

1. Benefits of our new benchmarking-enhanced debrief diamond-based IPE simulation courses.

*“This IPE course improves inter-professional relationships, communication skills, efficiency in holistic patient care and service delivery, team work, respect for one another and builds confidence in my profession.”*

2. Identified IPE/IPC elements in collaborative training.

*“We are all geared to patient-centered care, all professions need to use their best assessment and judgment to evaluate patients in order to provide the best patient care that we can.”*

*“We understand that there is a lot of team work going on our institution.”*

*“We understand that all professions should be encouraged within their training program to become independent in order to make IPC work better.”*

3. Improved skills of quality of clinical care.



1  
2  
3  
4  
5  
6  
7  
8  
9  
10  
11  
12  
13  
14  
15  
16  
17  
18  
19  
20  
21  
22  
23  
24  
25  
26  
27  
28  
29  
30  
31  
32  
33  
34  
35  
36  
37  
38  
39  
40  
41  
42  
43  
44  
45  
46  
47  
48  
49  
50  
51  
52  
53  
54  
55  
56  
57  
58  
59  
60

*“There are situations that are different, but we do have to rely on the expertise of other professionals' in order to obtain the best outcome for the patient.”*

*“We were able to collaborate very well with other professional health care members, especially with the nurses in their second simulation; they sort of referred to us regarding our drug management skills and sort of learned how important pharmacists can actually be in a hospital setting.”*

4. Skills learnt from their skillful facilitators.

*“Sometimes, staying in your own profession is great and everything, but you really sort of need to reach outwards and see what other professions have to offer; because only if you do that can you truly use the entire knowledge base of other professions and provide the best patient care.”*

***Addition of benchmarking sharing to enhance the continuous beneficial effects of training***

Compared to pre-courses (T<sub>1</sub>) scores, the degree of increase in total IEPS and ATHCTS scores at post-courses (T<sub>2</sub>) self-assessments were not different between Group 1 and 2 participants (data not shown). Among the Group 1 and 2 participants, similar or higher end-of-study (T<sub>3</sub>) IEPS and ATHCTS scores than post-courses (T<sub>2</sub>) scores indicated the sustained effects of 7-hour simulation-based debrief diamond-enhanced IPE courses (Figure 3). From the post-course (T<sub>2</sub>) to end-of-study (T<sub>3</sub>) period, a significantly greater increase in the total IEPS and ATHCTS scores of the group 1 (benchmarking) participants than for the Group 2 (regular) participants can be seen (Figure 3). This indicates the additional benefits of IPC benchmarking on the Group 1 participants' IPC attitude. Among the benchmarking-group' participants, the most improved items were the “competency and autonomy” and “perception of actual cooperation” subscales of the IEPS and the “quality of care delivery” and “team efficiency” subscales of the ATHCTS, when the T<sub>2</sub> and T<sub>3</sub> self-assessments were compared.

***Improvement of IPC attitudes among team members of three professions by the promotion of new intervention-trained seed instructors***

Among the randomly sampled team members, the pre-intervention survey (T<sub>pre</sub>) revealed that IPC attitudes across physicians, nurses and pharmacists must be improved in the aspects of IPC' familiarity, understanding of other professions' roles and benefits of IPC on quality of patient-centered care (Figure 3C). Across the three professions, after seed instructors began promoting IPC in the workplace, post-intervention (T<sub>post</sub>, 6<sup>th</sup> month) randomly sampled team member's reported that they were familiar with IPC skills, agreed that IPC helps one to understand the role of other team members, agreed that IPC improved patient care quality and agreed that IPC improved team efficiency (Figure 3C). Interestingly, the agreements of randomly sampled team members across three professions to the statement of “IPC helps provide patient-centered care” are excellent both in the pre-intervention (T<sub>pre</sub>) and post-intervention (T<sub>post</sub>) surveys (Figure 3C).

## DISCUSSION

Debriefing can help a learner clarify and integrate the simulation experience with their previous knowledge.<sup>8,10,11,22-24</sup> The debrief diamond encourages a standardized approach to high-quality debriefing across courses, which benefits both the participants and the involved faculty members.<sup>13,14</sup> The DAA debrief diamond is related to various aspects of the advocacy-inquiry approach and of debriefing with good judgment. The diamond provides an easy but pedagogically sound structure for facilitators to follow for specific post-simulation feedback and discussion. Nevertheless, the long-term effects of structured debriefing have not been through evaluated in previous simulated-enhanced IPE studies.<sup>8-15</sup>

In addition to serial subjective and objective assessments, our IPE model is characterized by a debrief diamond strategy (Figure 2). When trying to improve each medical professional's IPC attitude with limited resources, including the time needed to carry out the training, the number of faculty members needed to run the training and the facilities needed for the training, each newly-trained participant should act as a seed instructor within their team. In other words, successful training of seed instructors can result in profession-wide IPC promotion and attitude remodeling. In our study, this well-organized design allows each participant from three professions to have equal IPE exposure, which helps their development as seed instructors in their healthcare team.

By training volunteers from physicians, nurses and pharmacists, our interventional training program aims to change participants' behaviors and to act as seed instructors for promoting IPC in team member. In our study, the post-intervention survey, performed after the sequential simulation-based IPE courses, revealed that there was significant improvement in randomly sampled team members' IPC attitude across physicians, nurses and pharmacists.

The strengths of our pilot study are the extension of IPE via e-learning platform, benchmarking sharing and continuous self-evaluations. Previous studies have suggested that training videos consistently enhance the observational powers of trainees, as well as improving their ability to integrate different information and increasing their motivation to learn.<sup>25,26</sup> In our study, most participants reported that the availability of an e-learning platform that has sufficient IPE resources helps to continue their self-directed learning. Meanwhile, the benchmarking provides the enrolled participants with the opportunity for IPC self-reflection, as well as enhancing their motivation as seed instructors in their teams.

Primarily, this new simulation-based IPE program was intended to solve challenges, which are lack of continuous training and follow-up, of previous studies<sup>8-13,15</sup> and of our institution. Nevertheless, there were some limitations in our study that need to be improved in future study before concluding the effectiveness of this pilot benchmarking-enhanced debrief diamond-based IPE program on medical professionals' IPC practices and outcomes.

For a training program, Kirkpatrick level 1 and 2 were the evaluation of "participants satisfaction" and "participants increase confidence, knowledge and performance". Using IEPS and ATHCTS, our study revealed significant improvements in participants' motivation and IPC attitudes across the three professions after receiving training with our new IPE program. The participant's satisfaction with the new program and the degree of improvement in participant's competency, however, was not evaluated in our study. Kirkpatrick levels 3 and 4 in our study were the "multiplication" of knowledge by "seeding" and influence on the health care system. According to the real presented example in benchmarking sharing of our study, facilitators' gave high ratings for their agreement to participants' degree of appropriate transfer and sustainable practice of the learnt IPC skills to clinical works. The sequential improvements in participants' self-assessed IPC attitude scores also was noted in our study. Moreover, the comparison of pre-intervention and post-intervention randomly sampled team members, who were non-participants, revealed the general improvement in their IPC attitudes

1  
2  
3 and motivation. Nevertheless, for this part, the use of newly acquired knowledge or skills by  
4 medical professionals of our institution was not evaluated in our study. Taken together, our  
5 pilot study only achieved some of the goals of a training program, according to the  
6 Kirkpatrick 1-4 levels.<sup>27</sup>

7  
8 Our IPE approach targets IPC attitude specifically using a number of defined types of  
9 patient scenario that are suitable for all three of the enrolled professions. Nevertheless, the  
10 specific IPC skills required for holistic care of COPD cases clearly are different from those  
11 needed to care for acute renal failure cases. Undoubtedly, IPC skills are learned more readily  
12 when the simulation-enhanced IPE used is more relevant to the type of clinical situation. In  
13 our study, this limitation was alleviated by the multi-professional post-simulation debrief  
14 diamond-based debriefing during a 3.5-hour simulation workshop and the fact that the  
15 enrolled participants continued to carry out their regular clinical routines during the 3-month  
16 intervention period. In other words, our enrolled participants were likely interacting with  
17 other professions in their clinical routine after the first and second stimuli presented during  
18 the preparation and simulation workshops. In fact, it has been suggested that learning  
19 together with a variety of high-fidelity simulation modules in multi-professional groups  
20 would foster shared inter-professional collaborative (IPC) across many clinical situations.<sup>28-31</sup>

21  
22 As participation in this course was voluntary, participants were likely to be more highly  
23 motivated than non-participants, which may limit the generalizability of our results. Actually,  
24 the positive effects of the debrief diamond and preparation workshop had been reported in  
25 previous simulated-based IPE studies.<sup>13-15</sup> In our study, the lack of control groups without the  
26 debrief diamond method and preparation workshop, to exclude more effects of them on  
27 inter-professional skills, may still limit us to conclude the definite effectiveness of  
28 benchmarking-enhanced IPE on training. Both IEPS and ATHCTS have been suggested as  
29 reliable tools to assess the effectiveness of practice-based IPE interventions.<sup>19-21</sup> It has been  
30 validated that each subscale of IEPS and ATHCTS is a strong measurement for underlying  
31 IPC concepts that are crucial to medical professions.<sup>19-21</sup>

32  
33 Notably, the core elements in the constructive assessment tools, IEPS and ATHCTS,  
34 used in our studies were more focused on “communication and teamwork” than “coordination  
35 and leadership” skills.” Therefore, from Table 2, it seems that pharmacists and nurses perform  
36 better than physicians. Nonetheless, the facilitators' agreement for the degree of participant's  
37 appropriate transfer and sustainable practice of learnt “coordination and leadership” skills in  
38 the workplace were significantly higher among physicians than pharmacists and nurses in  
39 benchmarking sharing (Table 3). This might be caused by the culture where physicians take  
40 over the role of leadership in the healthcare system. These results remind educators to rethink  
41 strategies to balance inter-professional training.  
42  
43

#### 44 CONCLUSIONS

45 Our benchmarking-enhanced debrief diamond-based IPE simulation program was able to  
46 cultivated participants as seed instructors to modify the IPC attitude of their team members.  
47 The results of this pilot study are promising and suggest that a future large-scale study with  
48 extension to professions other than the three professions enrolled here should be considered.  
49 As enhancement of inter-professional skills can ensure high-quality patient care, seed  
50 instructor training can be suggested as a personal development plan for every health  
51 professional.  
52  
53  
54  
55  
56  
57  
58  
59  
60

1  
2  
3 **Acknowledgements** The authors express their gratitude to all members of the Clinical Skills  
4 Training Center, Department of Medical Education for their input for this article. We also  
5 gratefully appreciate professor Ralph Kirby and Joseph Harwood help us to correct the  
6 English writing of our manuscript.  
7  
8

9  
10 **Contributors** All authors have read and approved the final manuscript. Y-YY conceived and  
11 designed the study, analysis and interpretation of data, wrote the draft, recruited the study  
12 subjects, planned and performed the statistical analysis. H-MC made critical revision of  
13 manuscript. L-YY conceived and designed the study. C-CH recruited the study subjects,  
14 analysis and interpretation of data. J-FL acquisition, analysis and interpretation of data. F-YL  
15 study supervision, critical revision of manuscript. S-YK study supervision. C-CH acquisition  
16 of data. RK critical revision of manuscript.  
17  
18

19  
20  
21 **Funding** This work was supported by the government Ministry of Health and Welfare and  
22 Taiwan Association of Medical Education (TAME) and V105EA-005 of TVGH from the  
23 Taipei Veterans General Hospital, Taipei, Taiwan.  
24  
25

26  
27 **Competing interests** None.

28  
29 **Data sharing statement** No additional data available.  
30  
31  
32  
33  
34  
35  
36  
37  
38  
39  
40  
41  
42  
43  
44  
45  
46  
47  
48  
49  
50  
51  
52  
53  
54  
55  
56  
57  
58  
59  
60

## FIGURES AND LEGENDS

**Figure 1 The flow chart of this diamond-based inter-professional education (IPE) simulation study.** Detailed time points for trainings and assessment of this prospective pre-post comparative cross-sectional study.

**Figure 2 Protocols for small group preparation and simulation workshops.** The flow charts and detailed activities of first (preparation) and second (simulation) month' workshops, which were run in separate rooms over two consecutive days.

**Figure 3 Benchmarking-enhanced IPE pilot program improved participants and their team members' IPC attitudes.** The comparison of sequential changes of post-course ( $T_2$ ) and end-of-study ( $T_3$ ) subscales and scales of IEPS (**A**) and ATHCTS (**B**) between Group 1 (benchmarking) and Group 2 (regular) participants. (**C**). Comparison of responses from 132 randomly sampled members from the three professions (51 physicians, 45 nurses, 36 pharmacists twice) about IPC's attitudes in pre-intervention ( $T_{pre}$ ) and post-intervention ( $T_{post}$ ) survey. IPC attitude was assessed by five Likert scale responses ranging from 1: strongly disagree to 5: strongly agree. \* $p < 0.01$  vs. post-course ( $T_2$ ) or pre-intervention ( $T_{pre}$ ) scores; # $p < 0.01$  vs. Group 2 participants' scores.

## REFERENCES

1. Frenk J, Chen L, Bhutta ZA. Health professionals for a new century: transforming education to strengthen health systems in an interdependent world. *Lancet* 2010;376(9756):1923-58.
2. Reeves S, Hean S. Why we need theory to help us better understand the nature of interprofessional education, practice and care. *J Interprof Care* 2013;27(1):1-3.
3. Hean S, Craddock D, O'Halloran C. Learning theories and interprofessional education: A user's guide. *Learn Teach Health Soc Care Pract* 2009b; 8(4):250-62.
4. Pinar G. Simulation-enhanced interprofessional education in health care. *Creative Educ* 2015;6:1852-9.
5. Deschodt M, Flamaing J, Haentjens P, *et al.* Impact of geriatric consultation teams on clinical outcome in acute hospitals: a systemic review and meta-analysis. *BMC Med* 2013;11:38.
6. Lapkin S, Levett-Jones T, Gilligan C. A systemic review of the effectiveness of interprofessional education in health professional programs. *Nurse Educ Today* 2013;33(2):90-102.
7. Interprofessional Education Collaborative Expert Panel. Core competencies for interprofessional collaborative practice: report of an expert panel. Washington, D.C.: Interprofessional Education Collaborative; 2001.
8. Baker C, Pulling C, McGraw R, *et al.* Simulation in interprofessional education for patient-centered collaborative care. *J Adv Nurs* 2008;64(4):372-9.
9. Undre S, Koutantji M, Sevdalis N, *et al.* Multidisciplinary crisis simulations: the way forward for training surgical teams. *World J Surg* 2007;31(9):1843-53.
10. Paige JT, Kozmenko V, Yang T, *et al.* High-fidelity, simulation-based, interdisciplinary operating room team training at the point of care. *Surgery* 2009;145(2):138-46.
11. Vyas D, McCulloh R, Dyer C, *et al.* An interprofessional course using human patient simulation to teach patient safety and teamwork skills. *Am J Pharm Educ* 2012;76(4):71.
12. Estis JM, Rudd AB, Pruitt B, Wright T. Interprofessional simulation-based education enhances student knowledge of health professional roles and care of patients with tracheostomies and Passy-Muir® Valves. *J Nurs Educ Practice* 2015;5(6):123.
13. Watters C, Reedy G, Ross A, *et al.* Does interprofessional simulation increase self-efficacy: a comparative study? *BMJ Open* 2015;5:e005472.
14. Jaye P, Thomas L, Reedy G. "The diamond": a structure for simulation debrief. *The Clinical Teacher*. 2015;12:171-175.
15. Darlow B, Coleman K, McKinlay E, *et al.* The positive impact of inter-professional education: a controlled trial to evaluate a programme for health professional students. *BMC Med Educ* 2015;15:98.
16. Ellis J. All inclusive benchmarking. *J Nurs Manag* 2006;14(5):377-83.
17. Ellis J. Sharing the evidence: clinical practice benchmarking to improve continuously the quality of care. *J Adv Nurs* 2000;32(1):215-25.
18. Byakika-Kibwika P, Kutesa A, Baingana R, *et al.* A situation analysis of inter-professional education and practice for ethics and professionalism training at Makerere University College and Health Sciences. *BMC Res Notes* 2015;8:598.
19. Luecht RM, Madsen MK, Taugher MP, *et al.* Assessing professional perceptions: design and validation of an Interdisciplinary Education Perception Scale. *J Allied Health* 1990;19(2):181-91.
20. Buelow J, McAdams R, Adams A, *et al.* Interdisciplinary teamwork: student differences and teaching implications. *Am J Health Sci* 2010;1(1):11-21.
21. Heinemann GD, Schmitt MH, Farrell MP, *et al.* Development of an Attitudes Toward Health Care Teams Scale. *Eval Health Prof* 1999;22(1):123-42.

- 1
  - 2
  - 3
  - 4
  - 5
  - 6
  - 7
  - 8
  - 9
  - 10
  - 11
  - 12
  - 13
  - 14
  - 15
  - 16
  - 17
  - 18
  - 19
  - 20
  - 21
  - 22
  - 23
  - 24
  - 25
  - 26
  - 27
  - 28
  - 29
  - 30
  - 31
  - 32
  - 33
  - 34
  - 35
  - 36
  - 37
  - 38
  - 39
  - 40
  - 41
  - 42
  - 43
  - 44
  - 45
  - 46
  - 47
  - 48
  - 49
  - 50
  - 51
  - 52
  - 53
  - 54
  - 55
  - 56
  - 57
  - 58
  - 59
  - 60
22. Reese C, Jeffries PR, Engum SA. Learning together: using simulations to develop nursing and medical student collaboration. *Nurs Educ Perspect* 2011;31(1):33-37.
23. Robben S, Perry M, Nieuwenhuijzen L. van, *et al.* Impact of interprofessional education on collaboration attitudes, skills, and behavior among primary care professionals. *J Contin Educ Health Prof* 2012;32(3):196-204.
24. Oandasan I, Reeves S. Key elements of interprofessional education. Part 2: factors, processes and outcomes. *J Interprof Care* 2005;19(suppl 1): 39-48.
25. Chan LK, Patil NG, Chen JY, *et al.* Advantages of video trigger in problem-based learning. *Med Teach* 2010;32:760-5.
26. Balslev T, de Grave WS, Muijtjens AMM, *et al.* Comparison of text and video cases in a postgraduate problem-based learning format. *Med Educ* 2005;39(11):1086-92.
27. Salvatore VF. Evaluating training programs: The four levels, by Donald L. Kirkpatrick, Berrett-Koehler Publishers: *Am J Eval* 1998;19:259-61.
28. Baker C, Medves J, Luctkar-Flude M, Hopkins-Rossel D, *et al.* Evaluation of a simulation-based interprofessional educational module on adult suctioning using action research. *J Res Interprof Pract Educ* 2012; vol 2.2.
29. Luctkar-Flude M, Baker C, Hopkins-Rosseel D, *et al.* Development and evaluation of an interprofessional simulation-based learning module on infection control skills for prelicensure health professional students. *Clin Simul Nurse* 2014;10:395-405.
30. Luctkar-Flude M, Baker C, Pulling C, *et al.* Evaluating an undergraduate interprofessional simulation-based educational module: communication, teamwork, and confidence performing cardiac resuscitation skills. *Advan Med Educ Pract* 2010;1:59-66.
31. Puskar K, Mitchell AM, Lee H, *et al.* Simulated case studies illustrate interprofessional education for alcohol and drug use screening for healthcare professionals. *ARC J Nurs Healthcare* 2016;2(2):9-20.

1  
2  
3  
4  
5  
6  
7  
8  
9  
10  
11  
12  
13  
14  
15  
16  
17  
18  
19  
20  
21  
22  
23  
24  
25  
26  
27  
28  
29  
30  
31  
32  
33  
34  
35  
36  
37  
38  
39  
40  
41  
42  
43  
44  
45  
46  
47  
48  
49  
50  
51  
52  
53  
54  
55  
56  
57  
58  
59  
60

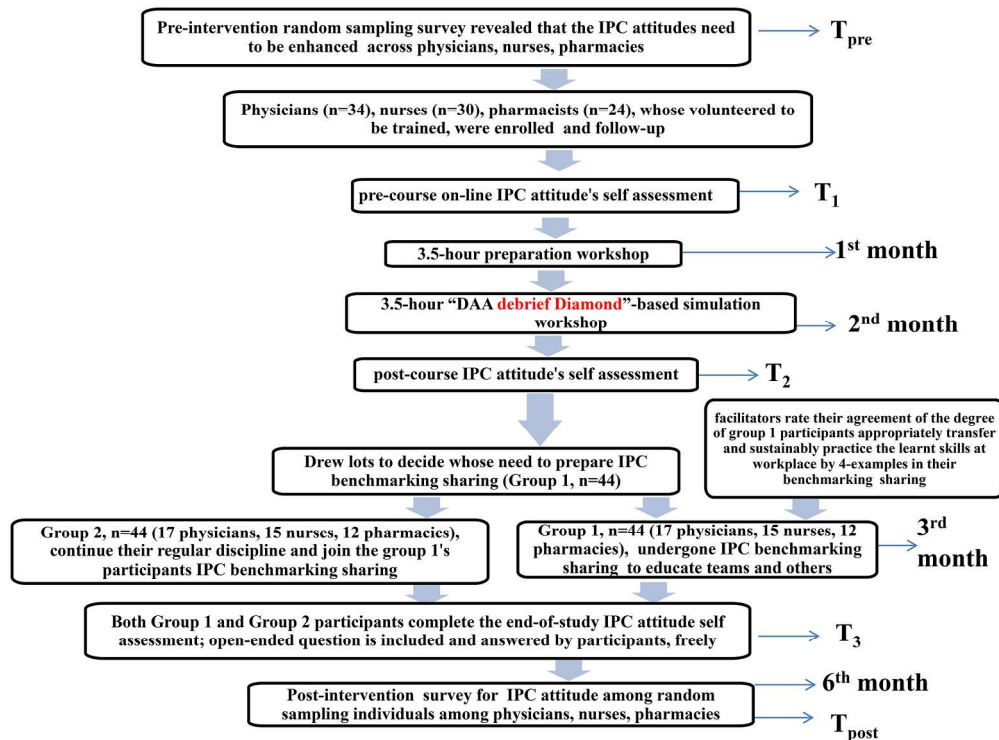

Fig. 1

203x150mm (300 x 300 DPI)



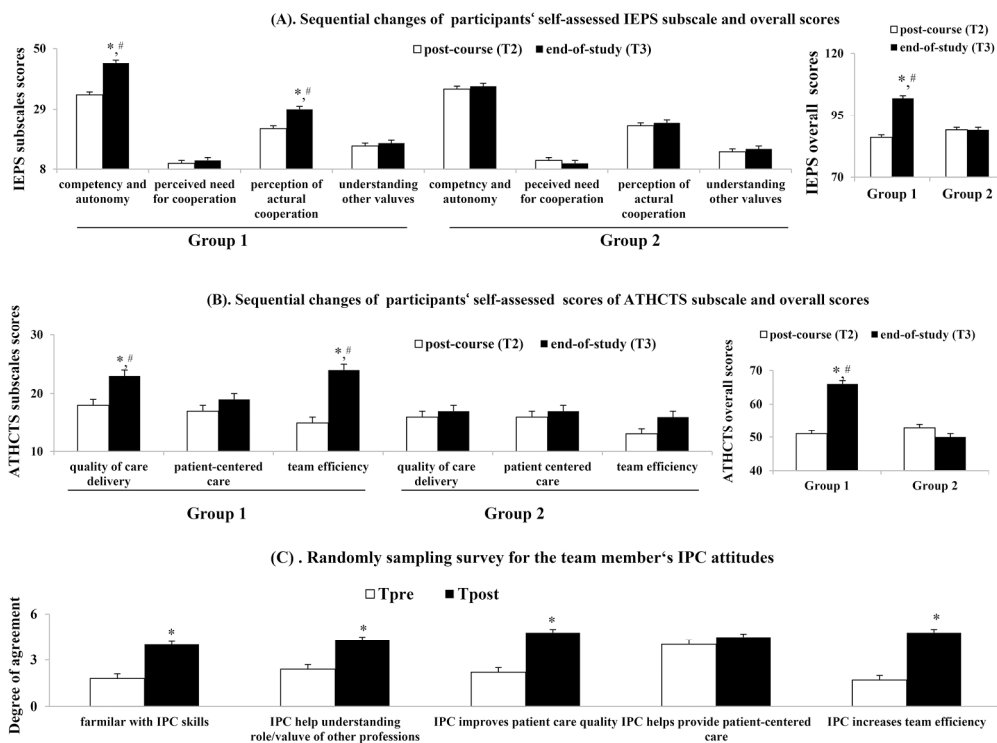

Fig. 2

203x149mm (300 x 300 DPI)

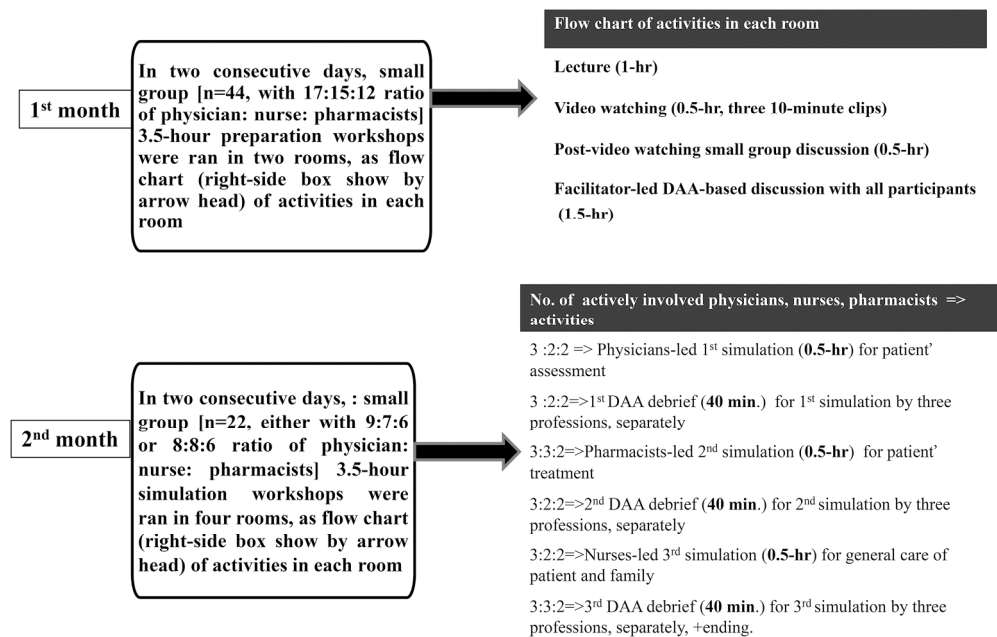

Fig. 3

203x128mm (300 x 300 DPI)

1  
2  
3  
4  
5  
6  
7  
8  
9  
10  
11  
12  
13  
14  
15  
16  
17  
18  
19  
20  
21  
22  
23  
24  
25  
26  
27  
28  
29  
30  
31  
32  
33  
34  
35  
36  
37  
38  
39  
40  
41  
42  
43  
44  
45  
46  
47

| <b>Supplement table 1</b> Interdisciplinary education perception scale (IEPS)                                                                                                                                                                                                                                                                                                                                                                                                                                                                                                                                                                                                                                                                                                                                                                                                                                                                                                                                                    |                                                                                                                                                                                                                                                                                                                                                                                                                                                                                                                                                                                                                     |
|----------------------------------------------------------------------------------------------------------------------------------------------------------------------------------------------------------------------------------------------------------------------------------------------------------------------------------------------------------------------------------------------------------------------------------------------------------------------------------------------------------------------------------------------------------------------------------------------------------------------------------------------------------------------------------------------------------------------------------------------------------------------------------------------------------------------------------------------------------------------------------------------------------------------------------------------------------------------------------------------------------------------------------|---------------------------------------------------------------------------------------------------------------------------------------------------------------------------------------------------------------------------------------------------------------------------------------------------------------------------------------------------------------------------------------------------------------------------------------------------------------------------------------------------------------------------------------------------------------------------------------------------------------------|
| subclasses                                                                                                                                                                                                                                                                                                                                                                                                                                                                                                                                                                                                                                                                                                                                                                                                                                                                                                                                                                                                                       | statement                                                                                                                                                                                                                                                                                                                                                                                                                                                                                                                                                                                                           |
| competency and autonomy (8 items)                                                                                                                                                                                                                                                                                                                                                                                                                                                                                                                                                                                                                                                                                                                                                                                                                                                                                                                                                                                                | 1. Individuals in my profession are well-trained.<br>2. Individuals in my profession demonstrate a great deal of autonomy.<br>3. Individuals in my profession are very positive about their goals and objectives.<br>4. Individuals in my profession are very positive about their contributions and accomplishments.<br>5. Individuals in my profession trust each other's professional judgment.<br>6. Individuals in my profession are extremely competent.<br>7. Individuals in other professions respect the work done by my profession.<br>8. Individuals in other professions think highly of my profession. |
| perceived need for cooperation (2 items)                                                                                                                                                                                                                                                                                                                                                                                                                                                                                                                                                                                                                                                                                                                                                                                                                                                                                                                                                                                         | 9. Individuals in my profession need to cooperate with other professions.<br>10. Individuals in my profession must depend upon the work of people in other professions.                                                                                                                                                                                                                                                                                                                                                                                                                                             |
| perception of actual cooperation (5 items)                                                                                                                                                                                                                                                                                                                                                                                                                                                                                                                                                                                                                                                                                                                                                                                                                                                                                                                                                                                       | 11. Individuals in my profession are able to work closely with individuals in other professions.<br>12. Individuals in my profession are willing to share information and resources with other professionals.<br>13. Individuals in my profession have good relations with people in other professions.<br>14. Individuals in my profession think highly of other related professions.<br>15. Individuals in my profession work well with each other.                                                                                                                                                               |
| understanding others value (3 items)                                                                                                                                                                                                                                                                                                                                                                                                                                                                                                                                                                                                                                                                                                                                                                                                                                                                                                                                                                                             | 16. Individuals in my profession have a higher status than individuals in other professions.<br>17. Individuals in my profession make every effort to understand the capabilities and contributions of other professions.<br>18. Individuals in other professions often seek the advice of people in my profession.                                                                                                                                                                                                                                                                                                 |
| Likert's Scale with 6 possible responses (1=Strongly Disagree, 2=Moderately Disagree, 3=Somewhat Disagree, 4=Somewhat Agree, 5=Moderately Agree, 6=Strongly Agree ); ** Higher scores represent more positive attitudes toward teamwork. "Competency and Autonomy" subscale measures how highly students respect their profession, in the sense that it is well taught and contributes significantly to improving the healthcare field, as well as to what extent they believe that other professions are respected in a similar fashion. "Perceived Need for Cooperation" reflects the responders' perceptions of the need for teamwork, which typically includes respecting and working well with other professions. "Perception of Actual Cooperation", aims to reveal the responders' perception of how their profession typically respects and works well with other professions. "Understanding Others' Values" aims to reflect the degree of respect the responder has for contributions from all healthcare professions. |                                                                                                                                                                                                                                                                                                                                                                                                                                                                                                                                                                                                                     |

1  
2  
3  
4  
5  
6  
7  
8  
9  
10  
11  
12  
13  
14  
15  
16  
17  
18  
19  
20  
21  
22  
23  
24  
25  
26  
27  
28  
29  
30  
31  
32  
33  
34  
35  
36  
37  
38  
39  
40  
41  
42  
43  
44  
45  
46  
47

| <b>Supplement table 2</b> Attitudes Toward Interprofessional Health Care Teams Scale (ATIHCTS)                                                              |                                                                                                                                                                                                                                                                                                                                                                                                                                                                                                                                                                                        |
|-------------------------------------------------------------------------------------------------------------------------------------------------------------|----------------------------------------------------------------------------------------------------------------------------------------------------------------------------------------------------------------------------------------------------------------------------------------------------------------------------------------------------------------------------------------------------------------------------------------------------------------------------------------------------------------------------------------------------------------------------------------|
| Subscales                                                                                                                                                   | STATEMENT                                                                                                                                                                                                                                                                                                                                                                                                                                                                                                                                                                              |
| quality of care delivery (5 items)                                                                                                                          | 1. Developing an inter-professional patient care plan is excessively time consuming.<br>2. The give and take among team members helps them make better patient care decisions.<br>3. The inter-professional approach makes the delivery of care more efficient.<br>4. Developing a patient care plan with other team members avoids errors in delivering care.<br>5. The inter-professional approach improves the quality of care to patients                                                                                                                                          |
| patient-centered care (4 items)                                                                                                                             | 6. Patients receiving inter-professional care are more likely than others to be treated as whole persons.<br>7. Health professionals working as teams are more responsive than others to the emotional and financial needs of patients<br>8. The inter-professional approach permits health professionals to meet the needs of family caregivers as well as patients.<br>9. Hospital patients who receive inter-professional team care are better prepared for discharge than other patients.                                                                                          |
| team efficiency (5 items)                                                                                                                                   | 10. Working in an inter-professional manner unnecessarily complicates things most of the time.<br>11. Working in an inter-professional environment keeps most health professionals enthusiastic and interested in their jobs.<br>12. In most instances, the time required for inter-professional consultations could be better spent in other ways<br>13. Having to report observations to a team helps team members better understand the work of other health professionals.<br>14. Team meetings foster communication among team members from different professions or disciplines. |
| * Likert's Scale with 5 possible responses (1=Strongly Disagree through 5=Strongly Agree);*Higher scores represent more positive attitudes toward teamwork. |                                                                                                                                                                                                                                                                                                                                                                                                                                                                                                                                                                                        |

view only

**Supplement table 3** Items of questionnaires used for pre-intervention and post-intervention random sampling survey of IPC attitudes

1. Are you familiar with IPC skills?
2. Do you agree that IPC helps understanding the role of other healthcare team members?
3. Do you agree that IPC improves quality of patient care?
4. Do you agree that IPC improves patient-centered care?
5. Do you agree that IPC improves team efficiency?

\* Likert's Scale with 5 possible responses (1=Strongly Disagree through 5=Strongly Agree);\* Higher scores represent better IPC attitudes

## Research check list

### Our article title had included the following point.

1. A structured abstract (max. 300 words) of: objectives, design, results and conclusion, or that meets the standards of the relevant reporting guideline (see below).
2. An 'Article summary' section consisting of three headings: 'Article focus' (up to three bullet points on the research questions or hypotheses addressed); 'Key messages' (up to three bullet points showing the key messages or significance of the study); and a 'Strengths and limitations of this study' section. This should be placed after the abstract.
3. The original protocol for the study, where one exists.
4. A funding statement, preferably worded as follows. Either: 'This work was supported by [name of funder] grant number [xxx]' or 'This research received no specific grant from any funding agency in the public, commercial or not-for-profit sectors'.
5. A competing interests statement.
6. Articles should list each author's contribution individually at the end; this section may also include contributors who do not qualify as authors.
7. Any checklist and flow diagram for the appropriate reporting statement, e.g. STROBE (see below).
8. Any article that contains personal medical information about an identifiable living individual requires the patient's explicit consent before we can publish it. We will need the patient to sign our [consent form](#), which requires the patient to have read the article. This form is available in multiple languages.

# BMJ Open

## Simulation based inter-professional education to improve attitudes towards collaborative practice: a prospective comparative pilot study in a Chinese medical center

|                                 |                                                                                                                                                                                                                                                                                                                                                                                                                                                                                                                                                                                                                                                                                                                                                                                                                                                                                                                       |
|---------------------------------|-----------------------------------------------------------------------------------------------------------------------------------------------------------------------------------------------------------------------------------------------------------------------------------------------------------------------------------------------------------------------------------------------------------------------------------------------------------------------------------------------------------------------------------------------------------------------------------------------------------------------------------------------------------------------------------------------------------------------------------------------------------------------------------------------------------------------------------------------------------------------------------------------------------------------|
| Journal:                        | <i>BMJ Open</i>                                                                                                                                                                                                                                                                                                                                                                                                                                                                                                                                                                                                                                                                                                                                                                                                                                                                                                       |
| Manuscript ID                   | bmjopen-2016-015105.R3                                                                                                                                                                                                                                                                                                                                                                                                                                                                                                                                                                                                                                                                                                                                                                                                                                                                                                |
| Article Type:                   | Research                                                                                                                                                                                                                                                                                                                                                                                                                                                                                                                                                                                                                                                                                                                                                                                                                                                                                                              |
| Date Submitted by the Author:   | 14-Sep-2017                                                                                                                                                                                                                                                                                                                                                                                                                                                                                                                                                                                                                                                                                                                                                                                                                                                                                                           |
| Complete List of Authors:       | Yang, Ling-Yu; Taipei Veteran General Hospital, Medical Education<br>Yang, Ying-Ying; Taipei Veterans General Hospital, Division of clinical skills training, Department of medical education<br>Huang, Chia-Chang; Taipei Veterans General Hospital, Division of clinical skills training, Department of medical education<br>Liang, Jen-Feng; Taipei Veterans General Hospital, Division of faculty development, Department of Medical education<br>Lee, Fa-Yauh; Taipei Veterans General Hospital, Division of general medicine, Department of Medicine<br>Cheng, Hao-Min; Taipei Veterans General Hospital, Division of faculty development, Department of Medical education<br>Huang, Chin-Chou; Taipei Veterans General Hospital, Division of Clinical skills training, Department of Medical education<br>Kao, Shou-Yen; Taipei Veterans General Hospital, Division of Dental medicine, Department of Medicine |
| <b>Primary Subject Heading</b>: | Medical education and training                                                                                                                                                                                                                                                                                                                                                                                                                                                                                                                                                                                                                                                                                                                                                                                                                                                                                        |
| Secondary Subject Heading:      | Communication                                                                                                                                                                                                                                                                                                                                                                                                                                                                                                                                                                                                                                                                                                                                                                                                                                                                                                         |
| Keywords:                       | nurses, pharmacists, inter-professional collaboration, interdisciplinary education perception, attitudes towards health care teams                                                                                                                                                                                                                                                                                                                                                                                                                                                                                                                                                                                                                                                                                                                                                                                    |
|                                 |                                                                                                                                                                                                                                                                                                                                                                                                                                                                                                                                                                                                                                                                                                                                                                                                                                                                                                                       |

SCHOLARONE™  
Manuscripts

1  
2  
3 Simulation based inter-professional education to improve attitudes towards  
4 collaborative practice: a prospective comparative pilot study in a Chinese medical  
5 center  
6  
7

8  
9  
10 Ling-Yu Yang,<sup>2</sup> Ying-Ying Yang,<sup>1,3,5</sup> Chia-Chang Huang,<sup>1,3,5</sup> Jen-Feng Liang,<sup>2,5</sup>  
11 Fa-Yauh Lee,<sup>3,5</sup> Hao Min Cheng,<sup>2,5</sup> Chin-Chou Huang,<sup>1,3,5</sup> Shou-Yen Kao,<sup>3,5</sup>  
12

13  
14  
15 <sup>1</sup>Division of Clinical Skills Training, <sup>2</sup>Department of Medical Education, <sup>3</sup>Department  
16 of Medicine, <sup>4</sup>Taipei Veterans General Hospital, Taipei, Taiwan  
17

18 <sup>5</sup>Department of Medicine, National Yang-Ming University, Taipei, Taiwan  
19

20 **Correspondence to**

21 Ying-Ying Yang; [yangyy@vghtpe.gov.tw](mailto:yangyy@vghtpe.gov.tw)  
22  
23  
24  
25  
26  
27  
28  
29  
30  
31  
32  
33  
34  
35  
36  
37  
38  
39  
40  
41  
42  
43  
44  
45  
46  
47  
48  
49  
50  
51  
52  
53  
54  
55  
56  
57  
58  
59  
60



**ABSTRACT**

**Objectives:** Inter-professional education (IPE) builds inter-professional collaboration (IPC) attitude/skills of health professionals. This interventional IPE program evaluates whether benchmarking sharing can successfully cultivate seed instructors responsible for improving their team members' IPC attitudes.

**Design:** Prospective, pre-post comparative cross-sectional pilot study.

**Setting/participants:** 34 physicians, 30 nurses and 24 pharmacists, who volunteered to be trained as seed instructors participated in 3.5-hr preparation and 3.5-hr simulation workshops. Then, participants (n=88) drew lots to decide 44 presenters, half of each profession, who needed to prepare IPC benchmarking and formed Group 1. The remaining participants formed Group 2 (regular). Facilitators rated the Group 1 participants' degree of appropriate transfer and sustainable practice of the learnt IPC skills in the workplace according to successful IPC examples in their benchmarking sharing.

**Results:** For the three professions, improvement in IPC attitude was identified by sequential increase in the post-course (2<sup>nd</sup> month, T<sub>2</sub>) and end-of-study (3<sup>rd</sup> month, T<sub>3</sub>) Interdisciplinary Education Perception Scale (IEPS) and Attitudes Towards Health Care Teams Scale (ATHCTS) scores, compared to pre-course (1<sup>st</sup> month, T<sub>1</sub>) scores. By IEPS and ATHCTS-based assessment, the degree of sequential improvements in IPC attitude was found to be higher among nurses and pharmacists than in physicians. In benchmarking sharing, the facilitators' agreement about the degree of participant's appropriate transfer and sustainable practice learnt "communication and teamwork" skills in the workplace were significantly higher among pharmacists and nurses than among physicians. The post-intervention random sampling survey (6<sup>th</sup> month, T<sub>post</sub>) found that the IPC attitude of three professions improved after on-site IPC skill promotion by new program-trained seed instructors within teams.

**Conclusions:** Addition of benchmark sharing to a diamond-based IPE simulation program enhances participants' IPC attitudes, self-reflection, workplace transfer and practice of the learnt skills. Furthermore, IPC promotion within teams by newly trained seed instructors improved the IPC attitudes across all three professions.

**Keywords:** nurses, pharmacists, inter-professional collaboration, interdisciplinary education perception, attitudes towards health care teams

**Strengths and limitations of this study**

- This pilot study describes the experiences of a prospective cross-sectional cohort of physicians, nurses and pharmacists who volunteered to receive serial benchmarking-enhanced diamond-based IPE simulation program for cultivating them as seed instructors to improve team members' IPC attitude.
- In our IPE program, IPC benchmarking sharing was implemented to enhance participants' continual motivation to self-reflect and to promote IPC among team members.
- Using IEPS and ATHCTS, our study reveals the significant improvements in participant's motivation and IPC attitude across three professions after receiving training with our new IPE program.
- Through IPC benchmarking presentation, participants' appropriate transfer and sustainable practice of the learnt IPC skills in the workplace was evaluated.
- Although participant's satisfaction with the new program and the degree of improvement in participant's competencies were not evaluated in our study.
- At this stage, the use of newly acquired knowledge or skills by medical professionals of our institution was not evaluated in our study.
- These results were limited to experience in one institution; the degree to which this can be extrapolated to IPE training in other institutions is not known.

## INTRODUCTION

Inter-professional education (IPE) aims to improve the coordination, communication, teamwork and leadership skills of health professionals by learning with, from and about each other.<sup>1</sup> Two key families of learning theory behaviorism and constructivism were applied to the curriculum design of IPE.<sup>2,3</sup> It has been reported that learning theories for IPE are not mutually exclusive. In fact, theorists agree that inter-professional learning “by doing” combined with learner centeredness is the key.<sup>2,3</sup> Health care simulations are recognized as an ideal vehicle for IPE.<sup>4</sup> Today's patients have complex chronic health issues that need inter-professional collaboration (IPC) in order to delivery well-coordinated, high-quality and patient-centered care.<sup>5,6</sup> Simulation-enhanced IPE helps the development of a health professional's IPC skills and these are very important when managing critical clinical situations.<sup>7</sup>

Baker, *et al.* reported that 2-hour cardiac resuscitation/intravenous access simulation-based IPE prepared medical students, nursing students and junior medical residents for their future as practitioners.<sup>8</sup> In their study, immediate attitudinal scores and responses by Interdisciplinary Education Perception Scale (IEPS) survey were consistently positive among both medical and nursing students.<sup>8</sup> Undre *et al.* reported that, using technical and human factors rating scales, trainers and multidisciplinary trainees assessed the crisis scenarios-based simulation training favorably, especially in technical skills.<sup>9</sup> Paige *et al.* revealed that 3-hour simulation-based interdisciplinary operating room IPE significantly improve the trainees' self-efficacy teamwork performance in role clarity, anticipatory response, cross monitoring, team cohesion and interaction.<sup>10</sup> In Vyas *et al.* study, using the team building and inter-professional communications survey, pharmacy student's reported that semi-urgent situations simulation-based IPE increased their understanding of professional roles and the importance of inter-professional communication.<sup>11</sup>

In Estis *et al.* study, using an attitudinal survey, speech language pathology, cardio-respiratory care and nursing students reported that simulation-based IPE enhanced their knowledge of medical professional roles/responsibilities and teamwork skills of caring for tracheostomy patients with speaking valves.<sup>12</sup> Nevertheless, participants in the Estis *et al.* study suggested that pre-simulation training and more structural interaction during the debriefing phase were likely to enhance effective of the IPE.<sup>12</sup> Specifically, Watters *et al.* implemented a debrief diamond, following description-analysis-application steps, during a 1-day simulation IPE course.<sup>13</sup> The standardized debrief diamond was designed to allow high-quality exploration of the non-technical aspects of a simulated scenario. The diamond is a two-sided prompt sheet: the first contains the scaffolding, with a series of constructed questions for each phase of the debriefing; while the second lays out the theory behind the questions and the process.<sup>13,14</sup> In Watters *et al.* study, using self-efficacy questionnaires, doctors and nurses reported that diamond-based simulation increased their confidence in “communication and teamwork” skills.<sup>13</sup> Darlow *et al.* reported that addition of a preparation workshop to their 11-hour IPE program resulted in improved attitudes towards inter-professional teams and inter-professional learning, as well as self-reported ability to function within an inter-professional team.<sup>15</sup>

Taken together, previous simulation-based IPE studies<sup>8-15</sup> were lacked post-course continuous training. In addition, there is an absence of long-term follow-up that allows the transference and sustainability of IPC practice to be assessed. Furthermore, there is an absence in these studies of opportunities for the participants

1  
2  
3  
4  
5  
6  
7  
8  
9  
10  
11  
12  
13  
14  
15  
16  
17  
18  
19  
20  
21  
22  
23  
24  
25  
26  
27  
28  
29  
30  
31  
32  
33  
34  
35  
36  
37  
38  
39  
40  
41  
42  
43  
44  
45  
46  
47  
48  
49  
50  
51  
52  
53  
54  
55  
56  
57  
58  
59  
60

to reflect on their training after a period of IPC practice. In 2014, a random sampling survey of three professions at our institution revealed that IPC attitudes of physician, nurses and pharmacists need to be improved (Figure 1).

It is important to develop feasible continuous IPE/IPC strategies to solve the problems of previous studies<sup>8-15</sup> and of our survey. Therefore, our education committee targeted these three professions and organized a new IPE program characterized by pre-simulation training, post-course continuous training, and immediate plus delayed IPC attitude assessments. Additionally, post-training e-learning platform and IPC benchmarking sharing provide an opportunity for additional/deepening learning of inter-professional problem solving skills. Benchmarking sharing, a good indicator of organizational seriousness about quality, is a continuous quality improvement approach. Healthcare benchmarking sharing provides opportunities for inter-professional participants to learn from others and develop innovative collaborative clinical care.<sup>16,17</sup> This pilot intervention intentionally evaluates its impact on cultivating new health professionals as seed instructors to promote IPC within their teams.

## METHODS

### Participants and setting

Between January 2015 and May 2016, we conducted a prospective cross-sectional comparative study at the high-fidelity clinical simulation and interactive learning center of TVGH; this center trains around 2500 staff each year. Taipei Veterans General Hospital (TVGH) is a 3000-bed medical center providing primary and tertiary care to active-duty and retired military personnel and their dependents, and the general public. Meanwhile, TVGH is the teaching hospital for several medical universities in Northern Taiwan.

Health professionals having more than 1 year but less than 4 years of clinical work experience were invited to participate in this study. The participants volunteering to be trained (n=94) were invited to join the 2015 pilot benchmarking-enhanced diamond-based IPE simulation courses to improve their IPC attitudes. After excluding six participants due to incomplete questionnaires, a total of n=88 individuals were included in this study. They consisted of physicians (n=34), nurses (n=30) and pharmacists (n=24).

Ethical approval (2015-06-017CC) was obtained from the Ethics committee of our institution and care was taken to apply the World Medical Association Declaration of Helsinki principles to the research.

### Time points of serial assessments

After a brief introduction, the participants were asked to complete the pre-course (T<sub>1</sub>) on-line IPC attitude's self-assessment. Each on-line self-assessment was numbered so that participants remained anonymous but their numbers could be used to match their pre-course (T<sub>1</sub>) self-assessment with post-course (T<sub>2</sub>) and end-of-study (T<sub>3</sub>) self-assessment (Figure 1). All participants continued with their usual professional clinical routine throughout the 3-month interventional study.

### IPC attitude's self-assessments

In our study, we measured participants' IPC attitudes with Interdisciplinary education perception scale<sup>18-20</sup> (IEPS, supplemental Table 1), Attitudes Toward Health Care Teams Scale<sup>21</sup> (ATHCTS, supplemental Table 2).

Additionally, participants were asked to provide qualitative feedback freely by answering the single-open-ended question, "*what is the one thing you are going to take away with you at the end of this course?*" in the online post-courses self-assessment (T<sub>3</sub>). This question was designed to prompt a participant to reflect on their own learning during the course and allowed the program director to gather evidence on which elements within the courses seemed to be contributing the most to the learning experience.

### Benchmarking-enhanced diamond-based IPE simulation courses

Each participant attended a 3.5-hour preparation workshop (T<sub>1</sub>) in the first month of this study (Figure 1). Subsequently, a 3.5-hour simulation workshop was arranged for the participants during the second month (T<sub>2</sub>). At the end of the simulation workshop, participants drew lots to decide who needed to prepare for post-course IPC benchmarking at the third month (T<sub>3</sub>) of study (*i.e.*, who was in Group 1). In order to maintain a fixed ratio (34:30:24) among the three professions (Figure 1), half (17:15:12) of the physicians, nurses and pharmacists were selected as Group 1 (benchmarking) and the others as Group 2 (regular).

1  
2  
3 (1). *Facilitators training and DAA debrief diamond*

4 All facilitators received serial sessions training in how to use the debrief  
5 diamond and to consent about how to rate their agreement about the degree of  
6 participants appropriate transfer and sustainable practice of the trained “coordination,  
7 communication, teamwork, and leadership” skills regarding IPC in the workplace  
8 using real examples in their benchmarking sharing. In particular, the  
9 Description-Analysis-Application (DAA) debrief diamond was used to involve  
10 participants in preparation (T1) and simulation (T2) workshops. The “description”  
11 step involved ‘description’ of each profession's IPC performance in the simulation  
12 scenario, along with more challenging “analysis” and “application” steps involving  
13 ‘how did participants feel about each profession's IPC performance in simulation  
14 scenario?’ and “how participants may apply the learnt knowledge from IPC  
15 simulation scenarios in their own clinical practice”.<sup>13,14</sup>

16  
17  
18 (2). *7-hour preparation and simulation workshop*

19 *-Preparation workshop (T<sub>1</sub>).* In accordance with previous study design,<sup>15</sup> two  
20 small-group preparation workshops were held on two consecutive days as shown in  
21 Figure 2. The simulated examples of IPC-based care from a previous study<sup>11</sup> were  
22 revised by educational committee and made into three video clips for IPE. They were,  
23 first, a simulation of a distracted wife and a 61-year-old dyspnea male who suffered  
24 from recurrent asthmatic attacks due to inappropriate home medication; second, a  
25 simulation of a 35-year-old anxious family, including a pregnant  
26 nausea/vomiting/abdominal pain female who needed the selection of suitable  
27 anti-emetics and a pediatrics/gynecology consultation in an ER setting and, finally,  
28 a simulation of a 57-year-old chest pain male with a distracted son and with the wrong  
29 allergy and ID labeling on his arm band, as well as unlocked bed in ICU setting.  
30 These 10-minutes clips provided a basis for post-video viewing discussion that were  
31 led by inter-professional facilitators following a Diamond DAA debriefing (1-hour);  
32 these target the role and value of the IPC healthcare team involved in the simulated  
33 clinical scenarios presented in the three videos.<sup>13,14</sup>

34  
35 *-Simulation workshop (T<sub>2</sub>).* In our simulation centers, four small-group  
36 workshops were held in four rooms within two consecutive days (Figure 2). Using the  
37 clinical scenario outlined below, workshops were led by well-trained IPE facilitators  
38 from dietetics, social workers and respiratory therapists. This scenario, which  
39 incorporates multi-disciplinary care, was modified by a previous study<sup>12</sup> and had a dry  
40 run before formally being used. A patient scenario involving Mr. Jason was developed  
41 collaboratively by the faculty members of the aforementioned professions.  
42 Participants were given the following information. Mr. Jason has a history of chronic  
43 obstructive pulmonary disease (COPD), smokes 60 packs per year of cigarettes and  
44 has hypertension, diabetes, coronary artery disease and atrial fibrillation. He has been  
45 admitted for acute exacerbation of his COPD five times in the past one year. Home  
46 medication includes aspirin, a calcium channel blocker, mycolytic agents, inhalation  
47 corticosteroid/bronchodilator and subcutaneous administered insulin. Mr. Jason was  
48 admitted 3 weeks ago for emergency coronary artery bypass grafting surgery.  
49 Although there has been aggressive management with regular chest percussion, he has  
50 had difficulty being weaned from the ventilator due to poor sputum expectation and  
51 malnutrition. The primary care teams now are considering a tracheostomy and  
52 intensive chest/nutrition therapy. His family members are at the bedside. During the  
53 simulation, a pre-set intubated high-fidelity SimMan® 3G simulator acted as the  
54 patient and standardized patients (SPs) were used as his family. Then, the 3.5-hour  
55 workshops were ran (Figure 2).  
56  
57  
58  
59  
60

1  
2  
3 Before the beginning of the simulation, the participants were presented with the  
4 case's name, age, gender, admission diagnosis and current medication/management. In  
5 the three simulation phases, the participants involved were expected to carry out  
6 assessment, treatments, and general care of the patients, collaboratively. Then, the  
7 participants began the post-simulation debriefing phase and reflected on the  
8 challenges, pitfalls, and successes that occurred within the simulation.

9  
10 (3). *The IPC benchmarking (T<sub>3</sub>) of the Group 1 participants.*

11 As mentioned above, 17 physicians, 15 nurses and 12 pharmacists formed Group  
12 1 and these participants underwent IPC benchmarking sharing. Presenters were asked  
13 to give their four examples of appropriately transfer and sustainable practice learnt  
14 IPC skills in the workplace. Randomly, four small groups (n=11) with ratio (4:4:3,  
15 4:4:3, 4:4:3 and 5:3:3) of physician to nurse to pharmacists were presented in four  
16 rooms over two consecutive days. During benchmarking sharing, two facilitators rated  
17 their 5-point Likert-scale-based agreement to the presenters' degree of appropriate  
18 transfer and sustainable practice of the learnt IPC skills in the workspace according to  
19 their four success examples. In each room, 4 hours (240 minutes) were needed for 11  
20 presenters to complete their 20-minutes presentation (15-min.)/discussion (5-min.).  
21 Each presentation was video recorded by teaching assistants (TAs) to help with  
22 continuous IPC promotion. With the agreement of the presenters, the TAs uploaded  
23 edited versions of the video to the e-learning platform. The Group 2 participants were  
24 asked to join this end-of-study (T<sub>3</sub>) IPC benchmarking sharing.  
25  
26

27  
28 **e-learning platform**

29 Both the Group 1 and Group 2 participants were invited to use a common IPE  
30 e-learning platform containing the aforementioned scenario, various Power-point  
31 presentations, the video used in the preparation/simulation workshop and the video  
32 from the IPC benchmarking to encourage self-directed learning.  
33

34  
35 **Pre-intervention (T<sub>pre</sub>) and Post-intervention (T<sub>post</sub>, 6<sup>th</sup> month) random sampling  
36 survey of IPC attitudes** (Figure 1)

37 Using IPC core elements-based questionnaires (supplement Table 3), across the  
38 three professions, the effectiveness of the well-trained seed instructors was evaluated  
39 by comparing the differences between T<sub>pre</sub> and T<sub>post</sub> ' IPC attitude scores<sup>22-24</sup>.  
40

41  
42 **Analysis**

43 Outcomes of our new training program were analyzed according to Kirkpatrick  
44 levels.<sup>25</sup> Since the IEPS and ATHCTS items are ordinal in nature, Wilcoxon's signed  
45 rank test was used to analyze each item. The means of the overall IEPS score and the  
46 four subscales were evaluated with the Student's two-tailed paired *t*-test for  
47 continuous measures, with the aim of detecting any differences between T<sub>1</sub> and T<sub>2</sub> as  
48 well as T<sub>2</sub> and T<sub>3</sub> time-points. Data from the IEPS and ATHCTS were matched by  
49 profession for analysis with one-way ANOVA or Mann-Whitney U test to detect the  
50 significant difference between among groups.  
51  
52  
53  
54  
55  
56  
57  
58  
59  
60

## RESULTS

The baseline characteristics of the participants, including mean age, gender and clinical experiences, were similar across the physicians, nurses and pharmacist as can be seen in Table 1. A higher percentage of pharmacists (45%/43%) and nurses (35%/36%) having experience receiving previous IPE training and higher frequency of exposure to IPC meeting during their previous year of clinical works than physicians (15%/14%) (Table 1). In other words, in comparison with nurses and pharmacists, a lower percentage of physicians belong to the high-exposure (>80% exposure to monthly IPC meeting/1-year) group, which indicates the physician's had less experience with IPC meeting participation during their last 1-year of clinical work

**Table 1 Baseline characteristics of study population (n=88)**

|                                                                                                                                                    | Physicians<br>(n=34) | Nurses<br>(n=30) | Pharmacists<br>(n=24) |
|----------------------------------------------------------------------------------------------------------------------------------------------------|----------------------|------------------|-----------------------|
| Age (years)                                                                                                                                        | 31.3± 2.7            | 29.1 ±4.8        | 30.5 ±3.6             |
| Female/male (No.)                                                                                                                                  | 30/4                 | 27/3             | 10/14                 |
| <b>Percentage of distribution of clinical-work-year of participants among groups</b>                                                               |                      |                  |                       |
| 1-2/2-3/ 3-4 years (%)                                                                                                                             | 76/14/10%            | 84/10/6%         | 69/20/11%             |
| <b>Percentage of distribution of participants with and without experience of receiving previous IPE training</b>                                   |                      |                  |                       |
| Percentage of distribution of participants with high/low frequency of exposure to IPC meeting during their last 1-yr of clinical work among groups |                      |                  |                       |
| Percentage of ‡high-exposure participants                                                                                                          | 14% <sup>#</sup>     | 36%              | 43%                   |
| Percentage of † low-exposure participants                                                                                                          | 86% <sup>#</sup>     | 64%              | 57%                   |

<sup>#</sup>p<0.01 vs. corresponding nurse's/pharmacist's group; ‡high-exposure participants indicated individual that participating more than 80% of monthly IPC meeting; †low-exposure participants indicated individual that participating less than 20% of monthly IPC meeting.

### *Good internal consistency of the IEPS/ATHCTS and its subscales*

In this study, the Cronbach's alpha coefficients of IEPS overall scales (0.721), competency and autonomy subscales (0.69), Perceived need for cooperation subscales (0.73), Perception of actual cooperation subscales (0.85) and Understanding others values subscales (0.662) were good. Meanwhile, Cronbach's alpha of ATHCTS overall scales (0.719), Quality of care delivery subscales (0.683), Patient-centered care subscales (0.801) and Team efficiency subscales (0.724) were acceptable.

### *Nurses and pharmacists had greater improvement of IEPS and ATHCTS scores than physicians*

The baseline IPC attitude, pre-course (T<sub>1</sub>) IEPS scores and pre-course (T<sub>1</sub>) ATHCTS scores were also similar across the physicians, nurses and pharmacists (Table 2). Compared to nurses, there were lower scores for the “competency and autonomy” and “understanding others values” basal IEPS subscales (T<sub>1</sub>) among the physicians. Similarly, also compared to nurses, there were lower scores for the “competency and autonomy” and “perception of actual cooperation” basal IEPS subscales (T<sub>1</sub>) among the pharmacists. Notably, the “competency and autonomy” subscale of IEPS score and the “team efficiency” subscale of the ATHCTS score (T<sub>2</sub>-T<sub>1</sub>) were increased by the 7-hour stepwise simulation-enhanced IPE course across three professions. In particular, the magnitude of increase in IEPS and ATHCTS



1  
2  
3 scores were significantly greater among the nurses and pharmacist than among the  
4 physicians (Table 2). Clearly, pharmacists had greater increase in percent change of  
5 post-courses ( $T_2$ ) ATHCTS score from pre-courses ( $T_1$ ) score than nurses or  
6 physicians (Table 2).  
7  
8  
9  
10  
11  
12  
13  
14  
15  
16  
17  
18  
19  
20  
21  
22  
23  
24  
25  
26  
27  
28  
29  
30  
31  
32  
33  
34  
35  
36  
37  
38  
39  
40  
41  
42  
43  
44  
45  
46  
47  
48  
49  
50  
51  
52  
53  
54  
55  
56  
57  
58  
59  
60

For peer review only

1  
2  
3  
4  
5  
6  
7  
8  
9  
10  
11  
12  
13  
14  
15  
16  
17  
18  
19  
20  
21  
22  
23  
24  
25  
26  
27  
28  
29  
30  
31  
32  
33  
34  
35  
36  
37  
38  
39  
40  
41  
42  
43  
44  
45  
46  
47  
48  
49

|                                                                                                                                                                                | Physicians (n=34)            |                               | Nurses (n=30)                |                               | Pharmacists (n=24)          |                               |
|--------------------------------------------------------------------------------------------------------------------------------------------------------------------------------|------------------------------|-------------------------------|------------------------------|-------------------------------|-----------------------------|-------------------------------|
|                                                                                                                                                                                | pre-course (T <sub>1</sub> ) | post-course (T <sub>2</sub> ) | pre-course (T <sub>1</sub> ) | post-course (T <sub>2</sub> ) | pre-course(T <sub>1</sub> ) | post-course (T <sub>2</sub> ) |
| <b>Total IEPS-18 scores [6-point scale]</b>                                                                                                                                    | 56±1.8 <sup>#</sup>          | 76±9.8 <sup>*,#</sup>         | 65±1.6                       | 91±1.2                        | 64±8                        | 91±4.7 <sup>*</sup>           |
| percent change of total IEPS post-course (T <sub>2</sub> ) score from pre-course (T <sub>1</sub> ) score                                                                       |                              | 18%                           |                              | 40% <sup>†</sup>              |                             | 42% <sup>†</sup>              |
| <b>IEPS subscales scores</b>                                                                                                                                                   |                              |                               |                              |                               |                             |                               |
| Competency and autonomy (8 items)                                                                                                                                              | 24±3.5 <sup>#</sup>          | 28±4.1 <sup>*,#</sup>         | 30±4.5                       | 39±7.2 <sup>*</sup>           | 22±5.4                      | 40±6.1 <sup>*</sup>           |
| Perceived need for cooperation (2 items)                                                                                                                                       | 7±2.2                        | 9±1.6                         | 8±2.9                        | 10±1.8                        | 9±3                         | 11±1.8                        |
| Perception of actual cooperation (5 items)                                                                                                                                     | 17±2.7                       | 24±3.7 <sup>*,#</sup>         | 15±1.2                       | 26±4.3 <sup>*</sup>           | 20±4.8                      | 23±2.5                        |
| Understanding others values (3 items)                                                                                                                                          | 8±2.4 <sup>#</sup>           | 15±2.9 <sup>*</sup>           | 12±3.8                       | 16±1.4                        | 13±2.1                      | 17±5.1 <sup>*</sup>           |
| <b>Total ATHCTS-14 [5-point scale]</b>                                                                                                                                         | 39±2.3                       | 48±5.4 <sup>*</sup>           | 38±2.6                       | 51±4.6                        | 32±3.7                      | 54±7.5                        |
| Percent change of total ATHCTS post-course (T <sub>2</sub> ) score from pre-course (T <sub>1</sub> ) score                                                                     |                              | 23%                           |                              | 34% <sup>†</sup>              |                             | 69% <sup>†</sup>              |
| <b>ATHCTS subscales scores</b>                                                                                                                                                 |                              |                               |                              |                               |                             |                               |
| Quality of care delivery (5 items)                                                                                                                                             | 14±2.2                       | 15±1.8 <sup>#</sup>           | 13±1.6                       | 18±4.1 <sup>*</sup>           | 12±4.2                      | 20±2.0 <sup>*</sup>           |
| Patient-centered care (4 items)                                                                                                                                                | 13±1.7                       | 18±2.1 <sup>*</sup>           | 15±7.4                       | 19±3.3                        | 11±2.8                      | 18±3.5 <sup>*</sup>           |
| Team efficiency (5 items)                                                                                                                                                      | 12±1.1                       | 15±3.7 <sup>*</sup>           | 10±1.9                       | 14±2.7 <sup>*</sup>           | 9±2.6                       | 16±4.1 <sup>*</sup>           |
| Data were expressed as mean±SD; * <i>p</i> <0.01 vs. pre-course scores; # <i>p</i> <0.01 vs. corresponding nurse's/pharmacists score's; † <i>p</i> <0.01 vs. physicians scores |                              |                               |                              |                               |                             |                               |

### *Participants appropriately transfer and sustainable practice of the learnt IPC skills in the workplace after training*

Based on the real examples in IPC benchmarking presentations of Group 1 participants, the facilitators found that physicians were more appropriately able to transfer and sustainably practice of the learnt IPC “coordination and leadership” skills in the workspace than pharmacists and nurses (Table 3).

**Table 3 Comparison of facilitators' agreement to group 1 participant's degree of appropriate transfer and sustainable practice of the learnt IPC skills in workplaces according to four success examples in their benchmarking sharing**

|           |                                                                                  | Physicians<br>(n=17) | Nurses<br>(n=15)      | Pharmacists<br>(n=12) |
|-----------|----------------------------------------------------------------------------------|----------------------|-----------------------|-----------------------|
| Example 1 | [1-1].Presenter transfers the “coordination” skills appropriately in workplaces  | 4.3±0.64             | 3.6±0.7 <sup>#</sup>  | 3.9±0.8 <sup>#</sup>  |
|           | [1-2].Presenter practices the “coordination” skills sustainably in workplaces    | 4.6±0.54             | 3.3±0.21 <sup>#</sup> | 4.1±0.7 <sup>#</sup>  |
| Example 2 | [2-1].Presenter transfers the “communication” skills appropriately in workplaces | 3.9±0.52*            | 4.1±0.94              | 4.4±0.7               |
|           | [2-2].Presenter practices the “communication” skills sustainably in workplaces   | 3.3±0.71*            | 4.01±0.76             | 4.8±0.1               |
| Example 3 | [3-1].Presenter transfers the “teamwork” skills appropriately in workplaces      | 3.4±0.502*           | 4.5±0.46              | 4.1±0.9               |
|           | [3-2].Presenter practices the “teamwork” skills sustainably in workplaces        | 3.8±0.2*             | 4.7±0.1               | 4.5±0.6               |
| Example 4 | [4-1].Presenter transfers the “leadership” skills appropriately in workplaces    | 4.4±0.803            | 3.4±0.61 <sup>#</sup> | 4.0±0.5 <sup>#</sup>  |
|           | [4-2].Presenter practices the “leadership” skills sustainably in workplaces      | 4.7±0.4              | 3.0±0.3 <sup>#</sup>  | 3.8±0.4 <sup>#</sup>  |

Data were expressed as mean±SD; Presenters were asked to present their four examples according to the sequences of items listed above. Sequentially, benchmarking' Example 1 for Item 1-1&1-2, example 2 for item 2-1&2-2, Example 3 for Item 3-1&3-2, Example 4 for Item 4-1&4-2 were presented. By consensus meeting, facilitators rate their agreement to the items 1-1 and 1-2 according to the Example 1 of presenter, Items 2-2 and 2-2 from Example 2, Item 3-1 and 3-2 from Example 3, Items 4-1 and 4-2 from Example 4 in separate rooms. The results are averaged data of ratings completed by two facilitators for the presenter's performance of each item in above checklist; #p<0.05 vs. physician's group; \*p<0.05 vs. nurse's/pharmacist's group.

In benchmarking sharing, the inter-rater reliability (Kappa statistics) of facilitators for the items used to assess whether participants were able to transfer and sustainably practice the learnt IPC skills was good (Table 4).

**Table 4 Inter-rater reliability of facilitators' ratings in benchmarking sharing of Group 1 participants**

|                                                                                 | Physicians | Nurses | Pharmacists |
|---------------------------------------------------------------------------------|------------|--------|-------------|
|                                                                                 | Kappa      | Kappa  | Kappa       |
| [1-1].Presenter transfers the “coordination” skills appropriately in workplaces | 0.73       | 0.71   | 0.85        |

|                                                                                                                                                                                                |       |       |       |
|------------------------------------------------------------------------------------------------------------------------------------------------------------------------------------------------|-------|-------|-------|
| [1-2].Presenter practices the “coordination” skills sustainably in workplaces                                                                                                                  | 0.67  | 0.843 | 0.76  |
| [2-1].Presenter transfers the “communication” skills appropriately in workplaces                                                                                                               | 0.69  | 0.82  | 0.89  |
| [2-2].Presenter practices the “communication” skills sustainably in workplaces                                                                                                                 | 0.71  | 0.79  | 0.77  |
| [3-1].Presenter transfers the “teamwork” skills appropriately in workplaces                                                                                                                    | 0.683 | 0.679 | 0.711 |
| [3-2].Presenter practices the “teamwork” skills sustainably in workplaces                                                                                                                      | 0.78  | 0.812 | 0.79  |
| [4-1].Presenter transfers the “leadership” skills appropriately in workplaces                                                                                                                  | 0.72  | 0.77  | 0.849 |
| [4-2].Presenter practices the “leadership” skills sustainably in workplaces                                                                                                                    | 0.83  | 0.74  | 0.816 |
| Two facilitators for each small-group [n=11, either with 4:4:3, 4:4:3, 4:4:3, 5:3:3 ratio of physician: nurse: pharmacists] benchmarking sharing held in four rooms over two consecutive days. |       |       |       |

### ***Participants gave positive descriptive feedbacks to the trainings***

In open-ended questions at the end of our study, most participants reported that watching the IPE-specific video and discussing it, as well as viewing the uploaded videos on the e-learning platform, markedly encourage their motivation to improve their IPC attitude. Specifically, the participant’s reported that the availability of an IPE/IPC-specific e-learning platform was able to improve the users' IPC attitude continuously by providing useful resources and instruction.

Selected completed feedback responses by the participants to the open-ended items of post-course self-assessment (T3) are listed below.

1. Benefits of our new benchmarking-enhanced debrief diamond-based IPE simulation courses.

*“This IPE course improves inter-professional relationships, communication skills, efficiency in holistic patient care and service delivery, team work, respect for one another and builds confidence in my profession.”*

2. Identified IPE/IPC elements in collaborative training.

*“We are all geared to patient-centered care, all professions need to use their best assessment and judgment to evaluate patients in order to provide the best patient care that we can.”*

*“We understand that there is a lot of team work going on our institution.”*

*“We understand that all professions should be encouraged within their training program to become independent in order to make IPC work better.”*

3. Improved skills of quality of clinical care.

*“There are situations that are different, but we do have to rely on the expertise of other professionals' in order to obtain the best outcome for the patient.”*

*“We were able to collaborate very well with other professional health care members, especially with the nurses in their second simulation; they sort of referred to us regarding our drug management skills and sort of learned how important pharmacists can actually be in a hospital setting.”*

4. Skills learnt from their skillful facilitators.

*“Sometimes, staying in your own profession is great and everything, but you really sort of need to reach outwards and see what other professions have to offer; because only if you do that can you truly use the entire knowledge base of other professions and provide the*

1  
2  
3 *best patient care.”*  
4

5 ***Addition of benchmarking sharing to enhance the continuous beneficial effects of training***

6 Compared to pre-courses (T<sub>1</sub>) scores, the degree of increase in total IEPS and ATHCTS  
7 scores at post-courses (T<sub>2</sub>) self-assessments were not different between Group 1 and 2  
8 participants (data not shown). Among the Group 1 and 2 participants, similar or higher  
9 end-of-study (T<sub>3</sub>) IEPS and ATHCTS scores than post-courses (T<sub>2</sub>) scores indicated the  
10 sustained effects of 7-hour simulation-based debrief diamond-enhanced IPE courses (Figure  
11 3). From the post-course (T<sub>2</sub>) to end-of-study (T<sub>3</sub>) period, a significantly greater increase in  
12 the total IEPS and ATHCTS scores of the group 1 (benchmarking) participants than for the  
13 Group 2 (regular) participants can be seen (Figure 3). This indicates the additional benefits of  
14 IPC benchmarking on the Group 1 participants' IPC attitude. Among the  
15 benchmarking-group' participants, the most improved items were the “competency and  
16 autonomy” and “perception of actual cooperation” subscales of the IEPS and the “quality of  
17 care delivery” and “team efficiency” subscales of the ATHCTS, when the T<sub>2</sub> and T<sub>3</sub>  
18 self-assessments were compared.  
19  
20  
21

22 ***Improvement of IPC attitudes among team members of three professions by the promotion***  
23 ***of new intervention-trained seed instructors***

24 In total, 132 valid T<sub>post</sub> questionnaires were collected for comparison with another 132  
25 valid T<sub>pre</sub> questionnaires. These anonymous T<sub>pre</sub> and T<sub>post</sub> questionnaires were completed by  
26 random members sampled twice from the three professions, namely 51 physicians, 45 nurses  
27 and 36 pharmacists. In other words, the individuals who responded to the online IPC attitude  
28 survey might be but are not necessarily different between T<sub>pre</sub> and T<sub>post</sub> survey. Nonetheless, it  
29 is important to note that the enrolled participants in our interventional study were excluded  
30 from the sampling pool for T<sub>post</sub> sampling survey.  
31

32 Among the randomly sampled team members, the pre-intervention survey (T<sub>pre</sub>) revealed  
33 that IPC attitudes across physicians, nurses and pharmacists must be improved in the aspects  
34 of IPC' familiarity, understanding of other professions' roles and benefits of IPC on quality of  
35 patient-centered care (Figure 3C). Across the three professions, after seed instructors began  
36 promoting IPC in the workplace, post-intervention (T<sub>post</sub>, 6<sup>th</sup> month) randomly sampled team  
37 member's reported that they were familiar with IPC skills, agreed that IPC helps one to  
38 understand the role of other team members, agreed that IPC improved patient care quality and  
39 agreed that IPC improved team efficiency (Figure 3C). Interestingly, the agreements of  
40 randomly sampled team members across three professions to the statement of “IPC helps  
41 provide patient-centered care” are excellent both in the pre-intervention (T<sub>pre</sub>) and  
42 post-intervention (T<sub>post</sub>) surveys (Figure 3C).  
43  
44  
45  
46  
47  
48  
49  
50  
51  
52  
53  
54  
55  
56  
57  
58  
59  
60

## DISCUSSION

In addition to serial subjective and objective assessments, our IPE model is characterized by a debrief diamond strategy (Figure 2). Debriefing can help a learner clarify and integrate the simulation experience with their previous knowledge.<sup>8,10,11,22-24</sup> The debrief diamond encourages a standardized approach to high-quality debriefing across courses, which benefits both the participants and the involved faculty members.<sup>13,14</sup> The DAA debrief diamond is related to various aspects of the advocacy-inquiry approach and of debriefing with good judgment. The diamond provides an easy but pedagogically sound structure for facilitators to follow for specific post-simulation feedback and discussion. Nevertheless, the long-term effects of structured debriefing have not been through evaluated in previous simulated-enhanced IPE studies.<sup>8-15</sup>

When trying to improve each medical professional's IPC attitude with limited resources, including the time needed to carry out the training, the number of faculty members needed to run the training and the facilities needed for the training, each newly-trained participant should act as a seed instructor within their team. In other words, successful training of seed instructors can result in profession-wide IPC promotion and attitude remodeling. In our study, this well-organized design allows each participant from three professions to have equal IPE exposure, which helps their development as seed instructors in their healthcare team.

By training volunteers from physicians, nurses and pharmacists, our interventional training program aims to change participants' behaviors and to act as seed instructors for promoting IPC in team member. In our study, the post-intervention survey, performed after the sequential simulation-based IPE courses, revealed that there was significant improvement in randomly sampled team members' IPC attitude across physicians, nurses and pharmacists.

The strengths of our pilot study are the extension of IPE via e-learning platform, benchmarking sharing and continuous self-evaluations. Previous studies have suggested that training videos consistently enhance the observational powers of trainees, as well as improving their ability to integrate different information and increasing their motivation to learn.<sup>25,26</sup> In our study, most participants reported that the availability of an e-learning platform that has sufficient IPE resources helps to continue their self-directed learning. Meanwhile, the benchmarking provides the enrolled participants with the opportunity for IPC self-reflection, as well as enhancing their motivation as seed instructors in their teams.

Primarily, this new simulation-based IPE program was intended to solve challenges, which are lack of continuous training and follow-up, of previous studies<sup>8-13,15</sup> and of our institution. Nevertheless, there were some limitations in our study that need to be improved in future study before concluding the effectiveness of this pilot benchmarking-enhanced debrief diamond-based IPE program on medical professionals' IPC practices and outcomes.

For a training program, Kirkpatrick level 1 and 2 were the evaluation of "participants satisfaction" and "participants increase confidence, knowledge and performance". Using IEPS and ATHCTS, our study revealed significant improvements in participants' motivation and IPC attitudes across the three professions after receiving training with our new IPE program. The participant's satisfaction with the new program and the degree of improvement in participant's competency, however, was not evaluated in our study. Kirkpatrick levels 3 and 4 in our study were the "multiplication" of knowledge by "seeding" and influence on the health care system. According to the real presented example in benchmarking sharing of our study, facilitators' gave high ratings for their agreement to participants' degree of appropriate transfer and sustainable practice of the learnt IPC skills to clinical works. The sequential improvements in participants' self-assessed IPC attitude scores also was noted in our study. Moreover, the comparison of pre-intervention and post-intervention randomly sampled team members, who were non-participants, revealed the general improvement in their IPC attitudes

1  
2  
3 and motivation. Nevertheless, for this part, the use of newly acquired knowledge or skills by  
4 medical professionals of our institution was not evaluated in our study. Taken together, our  
5 pilot study only achieved some of the goals of a training program, according to the  
6 Kirkpatrick 1-4 levels.<sup>27</sup>

7  
8 Our IPE approach targets IPC attitude specifically using a number of defined types of  
9 patient scenario that are suitable for all three of the enrolled professions. Nevertheless, the  
10 specific IPC skills required for holistic care of COPD cases clearly are different from those  
11 needed to care for acute renal failure cases. Undoubtedly, IPC skills are learned more readily  
12 when the simulation-enhanced IPE used is more relevant to the type of clinical situation. In  
13 our study, this limitation was alleviated by the multi-professional post-simulation debrief  
14 diamond-based debriefing during a 3.5-hour simulation workshop and the fact that the  
15 enrolled participants continued to carry out their regular clinical routines during the 3-month  
16 intervention period. In other words, our enrolled participants were likely interacting with  
17 other professions in their clinical routine after the first and second stimuli presented during  
18 the preparation and simulation workshops. In fact, it has been suggested that learning  
19 together with a variety of high-fidelity simulation modules in multi-professional groups  
20 would foster shared inter-professional collaborative (IPC) across many clinical situations.<sup>28-31</sup>

21  
22 As participation in this course was voluntary, participants were likely to be more highly  
23 motivated than non-participants, which may limit the generalizability of our results. Actually,  
24 the positive effects of the debrief diamond and preparation workshop had been reported in  
25 previous simulated-based IPE studies.<sup>13-15</sup> In our study, the lack of control groups without the  
26 debrief diamond method and preparation workshop, to exclude more effects of them on  
27 inter-professional skills, may still limit us to conclude the definite effectiveness of  
28 benchmarking-enhanced IPE on training. Both IEPS and ATHCTS have been suggested as  
29 reliable tools to assess the effectiveness of practice-based IPE interventions.<sup>19-21</sup> It has been  
30 validated that each subscale of IEPS and ATHCTS is a strong measurement for underlying  
31 IPC concepts that are crucial to medical professions.<sup>19-21</sup>

32  
33 Notably, the core elements in the constructive assessment tools, IEPS and ATHCTS,  
34 used in our studies were more focused on “communication and teamwork” than “coordination  
35 and leadership” skills.” Therefore, from Table 2, it seems that pharmacists and nurses perform  
36 better than physicians. Nonetheless, the facilitators' agreement for the degree of participant's  
37 appropriate transfer and sustainable practice of learnt “coordination and leadership” skills in  
38 the workplace were significantly higher among physicians than pharmacists and nurses in  
39 benchmarking sharing (Table 3). This might be caused by the culture where physicians take  
40 over the role of leadership in the healthcare system. These results remind educators to rethink  
41 strategies to balance inter-professional training.

## 42 43 44 **CONCLUSIONS**

45 Our benchmarking-enhanced debrief diamond-based IPE simulation program was able to  
46 cultivated participants as seed instructors to modify the IPC attitude of their team members.  
47 The results of this pilot study are promising and suggest that a future large-scale study with  
48 extension to professions other than the three professions enrolled here should be considered.  
49 As enhancement of inter-professional skills can ensure high-quality patient care, seed  
50 instructor training can be suggested as a personal development plan for every health  
51 professional.  
52  
53  
54  
55  
56  
57  
58  
59  
60

1  
2  
3 **Acknowledgements** The authors express their gratitude to all members of the Clinical Skills  
4 Training Center, Department of Medical Education for their input for this article. We also  
5 gratefully appreciate professor Ralph Kirby and Joseph Harwood help us to correct the  
6 English writing of our manuscript.  
7  
8

9  
10 **Contributors** All authors have read and approved the final manuscript. Y-YY conceived and  
11 designed the study, analysis and interpretation of data, wrote the draft, recruited the study  
12 subjects, planned and performed the statistical analysis. H-MC made critical revision of  
13 manuscript. L-YY conceived and designed the study. C-CH recruited the study subjects,  
14 analysis and interpretation of data. J-FL acquisition, analysis and interpretation of data. F-YL  
15 study supervision, critical revision of manuscript. S-YK study supervision. C-CH acquisition  
16 of data. RK critical revision of manuscript.  
17  
18  
19  
20

21 **Funding** This work was supported by the government Ministry of Health and Welfare and  
22 Taiwan Association of Medical Education (TAME) and V105EA-005 of TVGH from the  
23 Taipei Veterans General Hospital, Taipei, Taiwan.  
24  
25

26 **Competing interests** None.  
27

28 **Data sharing statement** No additional data available.  
29  
30  
31  
32  
33  
34  
35  
36  
37  
38  
39  
40  
41  
42  
43  
44  
45  
46  
47  
48  
49  
50  
51  
52  
53  
54  
55  
56  
57  
58  
59  
60



## FIGURES AND LEGENDS

**Figure 1 The flow chart of this diamond-based inter-professional education (IPE) simulation study.** Detailed time points for trainings and assessment of this prospective pre-post comparative cross-sectional study.

**Figure 2 Protocols for small group preparation and simulation workshops.** The flow charts and detailed activities of first (preparation) and second (simulation) month' workshops, which were run in separate rooms over two consecutive days.

**Figure 3 Benchmarking-enhanced IPE pilot program improved participants and their team members' IPC attitudes.** The comparison of sequential changes of post-course ( $T_2$ ) and end-of-study ( $T_3$ ) subscales and scales of IEPS (**A**) and ATHCTS (**B**) between Group 1 (benchmarking) and Group 2 (regular) participants. (**C**). Comparison of responses from 132 randomly sampled members from the three professions (51 physicians, 45 nurses, 36 pharmacists twice) about IPC's attitudes in pre-intervention ( $T_{pre}$ ) and post-intervention ( $T_{post}$ ) survey. IPC attitude was assessed by five Likert scale responses ranging from 1: strongly disagree to 5: strongly agree. \* $p < 0.01$  vs. post-course ( $T_2$ ) or pre-intervention ( $T_{pre}$ ) scores; # $p < 0.01$  vs. Group 2 participants' scores.

## REFERENCES

1. Frenk J, Chen L, Bhutta ZA. Health professionals for a new century: transforming education to strengthen health systems in an interdependent world. *Lancet* 2010;376(9756):1923-58.
2. Reeves S, Hean S. Why we need theory to help us better understand the nature of interprofessional education, practice and care. *J Interprof Care* 2013;27(1):1-3.
3. Hean S, Craddock D, O'Halloran C. Learning theories and interprofessional education: A user's guide. *Learn Teach Health Soc Care Pract* 2009b; 8(4):250-62.
4. Pinar G. Simulation-enhanced interprofessional education in health care. *Creative Educ* 2015;6:1852-9.
5. Deschodt M, Flamaing J, Haentjens P, et al. Impact of geriatric consultation teams on clinical outcome in acute hospitals: a systemic review and meta-analysis. *BMC Med* 2013;11:38.
6. Lapkin S, Levett-Jones T, Gilligan C. A systemic review of the effectiveness of interprofessional education in health professional programs. *Nurse Educ Today* 2013;33(2):90-102.
7. Interprofessional Education Collaborative Expert Panel. Core competencies for interprofessional collaborative practice: report of an expert panel. Washington, D.C.: Interprofessional Education Collaborative; 2001.
8. Baker C, Pulling C, McGraw R, et al. Simulation in interprofessional education for patient-centered collaborative care. *J Adv Nurs* 2008;64(4):372-9.
9. Undre S, Koutantji M, Sevdalis N, et al. Multidisciplinary crisis simulations: the way forward for training surgical teams. *World J Surg* 2007;31(9):1843-53.
10. Paige JT, Kozmenko V, Yang T, et al. High-fidelity, simulation-based, interdisciplinary operating room team training at the point of care. *Surgery* 2009;145(2):138-46.
11. Vyas D, McCulloh R, Dyer C, et al. An interprofessional course using human patient simulation to teach patient safety and teamwork skills. *Am J Pharm Educ* 2012;76(4):71.
12. Estis JM, Rudd AB, Pruitt B, Wright T. Interprofessional simulation-based education enhances student knowledge of health professional roles and care of patients with tracheostomies and Passy-Muir® Valves. *J Nurs Educ Practice* 2015;5(6):123.
13. Watters C, Reedy G, Ross A, et al. Does interprofessional simulation increase self-efficacy: a comparative study? *BMJ Open* 2015;5:e005472.
14. Jaye P, Thomas L, Reedy G. "The diamond": a structure for simulation debrief. *The Clinical Teacher*. 2015;12:171-175.
15. Darlow B, Coleman K, McKinlay E, et al. The positive impact of inter-professional education: a controlled trial to evaluate a programme for health professional students. *BMC Med Educ* 2015;15:98.
16. Ellis J. All inclusive benchmarking. *J Nurs Manag* 2006;14(5):377-83.
17. Ellis J. Sharing the evidence: clinical practice benchmarking to improve continuously the quality of care. *J Adv Nurs* 2000;32(1):215-25.
18. Byakika-Kibwika P, Kutesa A, Baingana R, et al. A situation analysis of inter-professional education and practice for ethics and professionalism training at Makerere University College and Health Sciences. *BMC Res Notes* 2015;8:598.
19. Luecht RM, Madsen MK, Taugher MP, et al. Assessing professional perceptions: design and validation of an Interdisciplinary Education Perception Scale. *J Allied Health* 1990;19(2):181-91.
20. Buelow J, McAdams R, Adams A, et al. Interdisciplinary teamwork: student differences and teaching implications. *Am J Health Sci* 2010;1(1):11-21.
21. Heinemann GD, Schmitt MH, Farrell MP, et al. Development of an Attitudes Toward Health Care Teams Scale. *Eval Health Prof* 1999;22(1):123-42.

22. Reese C, Jeffries PR, Engum SA. Learning together: using simulations to develop nursing and medical student collaboration. *Nurs Educ Perspect* 2011;31(1):33-37.
23. Robben S, Perry M, Nieuwenhuijzen L. van, *et al.* Impact of interprofessional education on collaboration attitudes, skills, and behavior among primary care professionals. *J Contin Educ Health Prof* 2012;32(3):196-204.
24. Oandasan I, Reeves S. Key elements of interprofessional education. Part 2: factors, processes and outcomes. *J Interprof Care* 2005;19(suppl 1): 39-48.
25. Chan LK, Patil NG, Chen JY, *et al.* Advantages of video trigger in problem-based learning. *Med Teach* 2010;32:760-5.
26. Balslev T, de Grave WS, Muijtjens AMM, *et al.* Comparison of text and video cases in a postgraduate problem-based learning format. *Med Educ* 2005;39(11):1086-92.
27. Salvatore VF. Evaluating training programs: The four levels, by Donald L. Kirkpatrick, Berrett-Koehler Publishers: *Am J Eval* 1998;19:259-61.
28. Baker C, Medves J, Luctkar-Flude M, Hopkins-Rossel D, *et al.* Evaluation of a simulation-based interprofessional educational module on adult suctioning using action research. *J Res Interprof Pract Educ* 2012; vol 2.2.
29. Luctkar-Flude M, Baker C, Hopkins-Rosseel D, *et al.* Development and evaluation of an interprofessional simulation-based learning module on infection control skills for prelicensure health professional students. *Clin Simul Nurse* 2014;10:395-405.
30. Luctkar-Flude M, Baker C, Pulling C, *et al.* Evaluating an undergraduate interprofessional simulation-based educational module: communication, teamwork, and confidence performing cardiac resuscitation skills. *Advan Med Educ Pract* 2010;1:59-66.
31. Puskar K, Mitchell AM, Lee H, *et al.* Simulated case studies illustrate interprofessional education for alcohol and drug use screening for healthcare professionals. *ARC J Nurs Healthcare* 2016;2(2):9-20.

1  
2  
3  
4  
5  
6  
7  
8  
9  
10  
11  
12  
13  
14  
15  
16  
17  
18  
19  
20  
21  
22  
23  
24  
25  
26  
27  
28  
29  
30  
31  
32  
33  
34  
35  
36  
37  
38  
39  
40  
41  
42  
43  
44  
45  
46  
47  
48  
49  
50  
51  
52  
53  
54  
55  
56  
57  
58  
59  
60

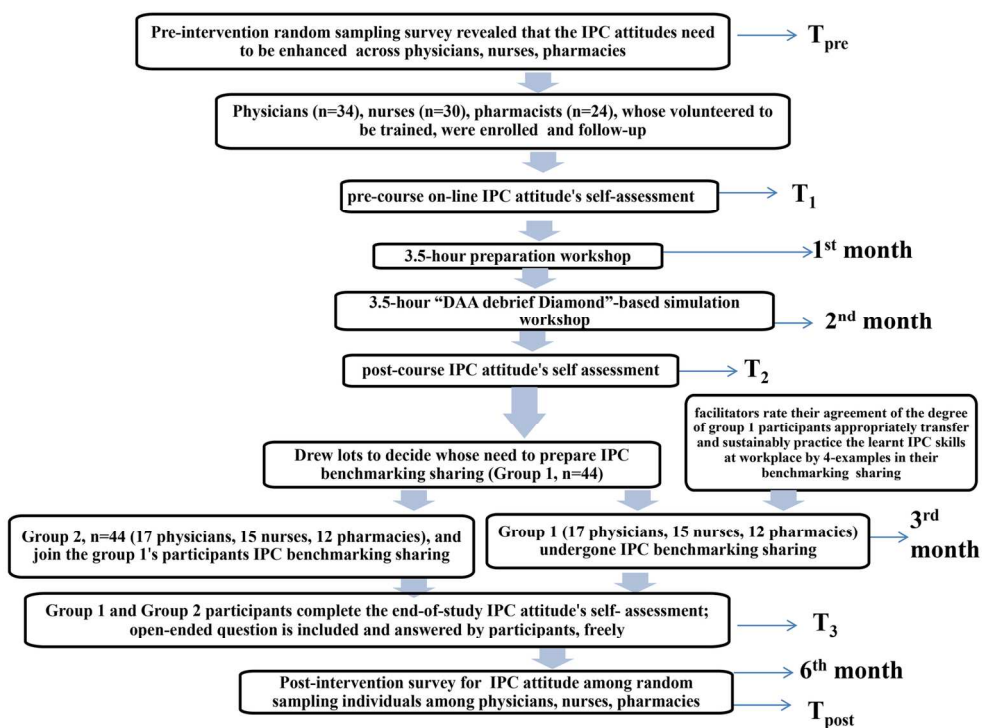

Fig. 1

152x114mm (300 x 300 DPI)

ew only

1  
2  
3  
4  
5  
6  
7  
8  
9  
10  
11  
12  
13  
14  
15  
16  
17  
18  
19  
20  
21  
22  
23  
24  
25  
26  
27  
28  
29  
30  
31  
32  
33  
34  
35  
36  
37  
38  
39  
40  
41  
42  
43  
44  
45  
46  
47  
48  
49  
50  
51  
52  
53  
54  
55  
56  
57  
58  
59  
60

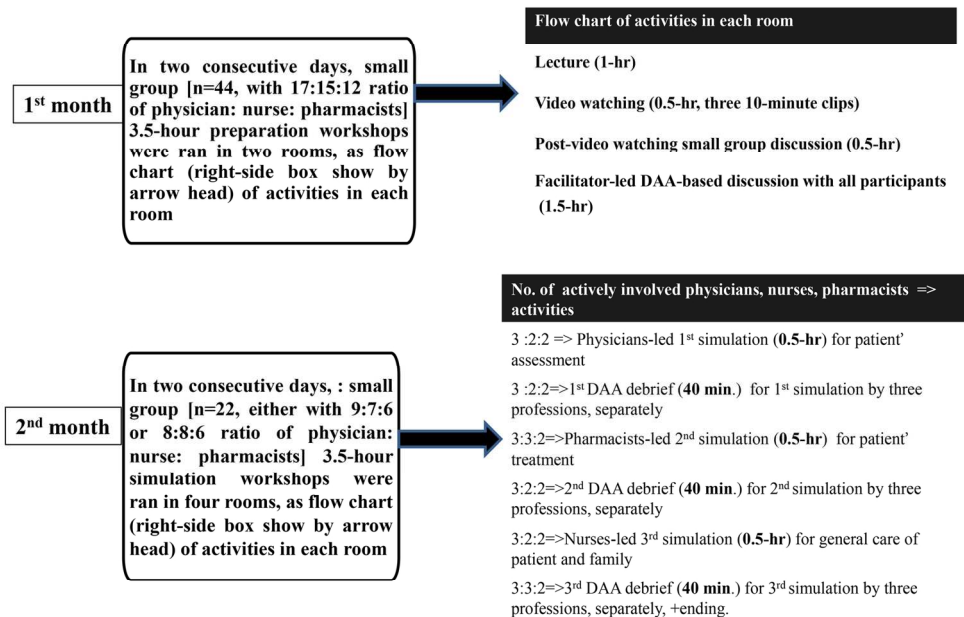

Fig. 2

152x114mm (300 x 300 DPI)

ew only

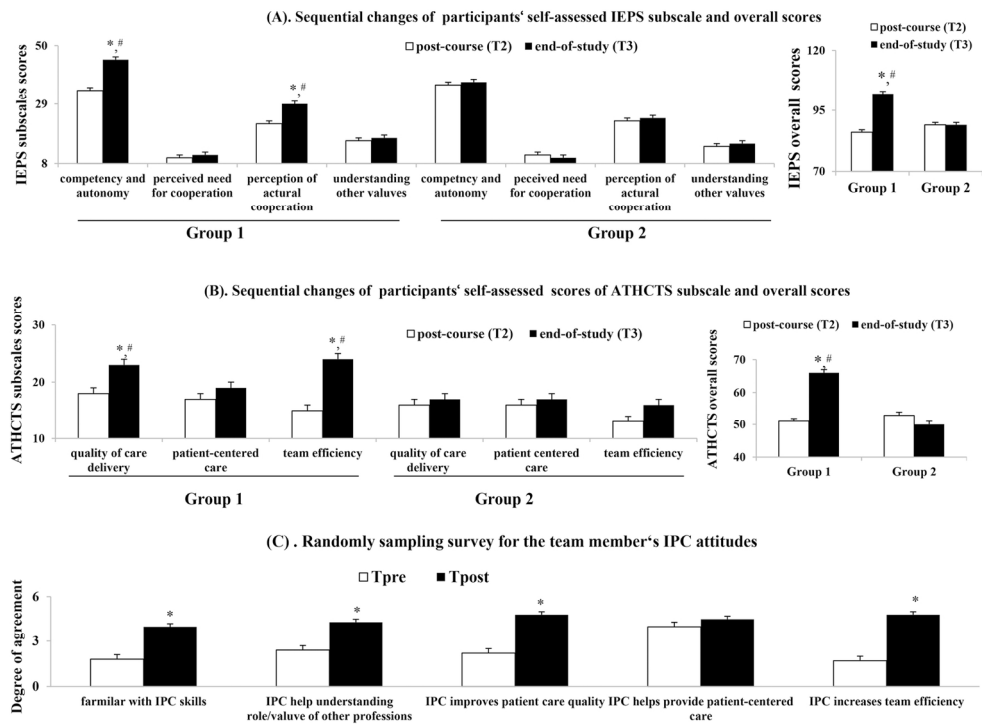

Fig. 3

152x114mm (300 x 300 DPI)

1  
2  
3  
4  
5  
6  
7  
8  
9  
10  
11  
12  
13  
14  
15  
16  
17  
18  
19  
20  
21  
22  
23  
24  
25  
26  
27  
28  
29  
30  
31  
32  
33  
34  
35  
36  
37  
38  
39  
40  
41  
42  
43  
44  
45  
46  
47

| <b>Supplement table 1</b> Interdisciplinary education perception scale (IEPS)                                                                                                                                                            |                                                                                                                                                                                                                                                                                                                                                                                                                                                                                                                                                                                                                     |
|------------------------------------------------------------------------------------------------------------------------------------------------------------------------------------------------------------------------------------------|---------------------------------------------------------------------------------------------------------------------------------------------------------------------------------------------------------------------------------------------------------------------------------------------------------------------------------------------------------------------------------------------------------------------------------------------------------------------------------------------------------------------------------------------------------------------------------------------------------------------|
| subclasses                                                                                                                                                                                                                               | statement                                                                                                                                                                                                                                                                                                                                                                                                                                                                                                                                                                                                           |
| competency and autonomy (8 items)                                                                                                                                                                                                        | 1. Individuals in my profession are well-trained.<br>2. Individuals in my profession demonstrate a great deal of autonomy.<br>3. Individuals in my profession are very positive about their goals and objectives.<br>4. Individuals in my profession are very positive about their contributions and accomplishments.<br>5. Individuals in my profession trust each other's professional judgment.<br>6. Individuals in my profession are extremely competent.<br>7. Individuals in other professions respect the work done by my profession.<br>8. Individuals in other professions think highly of my profession. |
| perceived need for cooperation (2 items)                                                                                                                                                                                                 | 9. Individuals in my profession need to cooperate with other professions.<br>10. Individuals in my profession must depend upon the work of people in other professions.                                                                                                                                                                                                                                                                                                                                                                                                                                             |
| perception of actual cooperation (5 items)                                                                                                                                                                                               | 11. Individuals in my profession are able to work closely with individuals in other professions.<br>12. Individuals in my profession are willing to share information and resources with other professionals.<br>13. Individuals in my profession have good relations with people in other professions.<br>14. Individuals in my profession think highly of other related professions.<br>15. Individuals in my profession work well with each other.                                                                                                                                                               |
| understanding others value (3 items)                                                                                                                                                                                                     | 16. Individuals in my profession have a higher status than individuals in other professions.<br>17. Individuals in my profession make every effort to understand the capabilities and contributions of other professions.<br>18. Individuals in other professions often seek the advice of people in my profession.                                                                                                                                                                                                                                                                                                 |
| Likert's Scale with 6 possible responses (1=Strongly Disagree, 2=Moderately Disagree, 3=Somewhat Disagree, 4=Somewhat Agree, 5=Moderately Agree, 6=Strongly Agree ); ** Higher scores represent more positive attitudes toward teamwork. |                                                                                                                                                                                                                                                                                                                                                                                                                                                                                                                                                                                                                     |

1  
2  
3  
4  
5  
6  
7  
8  
9  
10  
11  
12  
13  
14  
15  
16  
17  
18  
19  
20  
21  
22  
23  
24  
25  
26  
27  
28  
29  
30  
31  
32  
33  
34  
35  
36  
37  
38  
39  
40  
41  
42  
43  
44  
45  
46  
47

**Supplement table 2** Attitudes Toward Interprofessional Health Care Teams Scale (ATIHCTS)

| Subscales                          | STATEMENT                                                                                                                                                                                                                                                                                                                                                                                                                                                                                                                                                                              |
|------------------------------------|----------------------------------------------------------------------------------------------------------------------------------------------------------------------------------------------------------------------------------------------------------------------------------------------------------------------------------------------------------------------------------------------------------------------------------------------------------------------------------------------------------------------------------------------------------------------------------------|
| quality of care delivery (5 items) | 1. Developing an inter-professional patient care plan is excessively time consuming.<br>2. The give and take among team members helps them make better patient care decisions.<br>3. The inter-professional approach makes the delivery of care more efficient.<br>4. Developing a patient care plan with other team members avoids errors in delivering care.<br>5. The inter-professional approach improves the quality of care to patients                                                                                                                                          |
| patient-centered care (4 items)    | 6. Patients receiving inter-professional care are more likely than others to be treated as whole persons.<br>7. Health professionals working as teams are more responsive than others to the emotional and financial needs of patients<br>8. The inter-professional approach permits health professionals to meet the needs of family caregivers as well as patients.<br>9. Hospital patients who receive inter-professional team care are better prepared for discharge than other patients.                                                                                          |
| team efficiency (5 items)          | 10. Working in an inter-professional manner unnecessarily complicates things most of the time.<br>11. Working in an inter-professional environment keeps most health professionals enthusiastic and interested in their jobs.<br>12. In most instances, the time required for inter-professional consultations could be better spent in other ways<br>13. Having to report observations to a team helps team members better understand the work of other health professionals.<br>14. Team meetings foster communication among team members from different professions or disciplines. |

\* Likert's Scale with 5 possible responses (1=Strongly Disagree through 5=Strongly Agree);\*Higher scores represent more positive attitudes toward teamwork.

view only



**Supplement table 3** IPC core elements-based questionnaires used for pre-intervention and post-intervention random sampling survey of IPC attitudes

1. Are you familiar with IPC skills?
2. Do you agree that IPC helps understanding the role of other healthcare team members?
3. Do you agree that IPC improves quality of patient care?
4. Do you agree that IPC improves patient-centered care?
5. Do you agree that IPC improves team efficiency?

\* Likert's Scale with 5 possible responses (1=Strongly Disagree through 5=Strongly Agree);\* Higher scores represent better IPC attitudes

## Research check list

### Our article title had included the following point.

1. A structured abstract (max. 300 words) of: objectives, design, results and conclusion, or that meets the standards of the relevant reporting guideline (see below).
2. An 'Article summary' section consisting of three headings: 'Article focus' (up to three bullet points on the research questions or hypotheses addressed); 'Key messages' (up to three bullet points showing the key messages or significance of the study); and a 'Strengths and limitations of this study' section. This should be placed after the abstract.
3. The original protocol for the study, where one exists.
4. A funding statement, preferably worded as follows. Either: 'This work was supported by [name of funder] grant number [xxx]' or 'This research received no specific grant from any funding agency in the public, commercial or not-for-profit sectors'.
5. A competing interests statement.
6. Articles should list each author's contribution individually at the end; this section may also include contributors who do not qualify as authors.
7. Any checklist and flow diagram for the appropriate reporting statement, e.g. STROBE (see below).
8. Any article that contains personal medical information about an identifiable living individual requires the patient's explicit consent before we can publish it. We will need the patient to sign our [consent form](#), which requires the patient to have read the article. This form is available in multiple languages.

# BMJ Open

## Simulation based inter-professional education to improve attitudes towards collaborative practice: a prospective comparative pilot study in a Chinese medical center

|                                 |                                                                                                                                                                                                                                                                                                                                                                                                                                                                                                                                                                                                                                                                                                                                                                                                                                                                                                                       |
|---------------------------------|-----------------------------------------------------------------------------------------------------------------------------------------------------------------------------------------------------------------------------------------------------------------------------------------------------------------------------------------------------------------------------------------------------------------------------------------------------------------------------------------------------------------------------------------------------------------------------------------------------------------------------------------------------------------------------------------------------------------------------------------------------------------------------------------------------------------------------------------------------------------------------------------------------------------------|
| Journal:                        | <i>BMJ Open</i>                                                                                                                                                                                                                                                                                                                                                                                                                                                                                                                                                                                                                                                                                                                                                                                                                                                                                                       |
| Manuscript ID                   | bmjopen-2016-015105.R4                                                                                                                                                                                                                                                                                                                                                                                                                                                                                                                                                                                                                                                                                                                                                                                                                                                                                                |
| Article Type:                   | Research                                                                                                                                                                                                                                                                                                                                                                                                                                                                                                                                                                                                                                                                                                                                                                                                                                                                                                              |
| Date Submitted by the Author:   | 27-Sep-2017                                                                                                                                                                                                                                                                                                                                                                                                                                                                                                                                                                                                                                                                                                                                                                                                                                                                                                           |
| Complete List of Authors:       | Yang, Ling-Yu; Taipei Veteran General Hospital, Medical Education<br>Yang, Ying-Ying; Taipei Veterans General Hospital, Division of clinical skills training, Department of medical education<br>Huang, Chia-Chang; Taipei Veterans General Hospital, Division of clinical skills training, Department of medical education<br>Liang, Jen-Feng; Taipei Veterans General Hospital, Division of faculty development, Department of Medical education<br>Lee, Fa-Yauh; Taipei Veterans General Hospital, Division of general medicine, Department of Medicine<br>Cheng, Hao-Min; Taipei Veterans General Hospital, Division of faculty development, Department of Medical education<br>Huang, Chin-Chou; Taipei Veterans General Hospital, Division of Clinical skills training, Department of Medical education<br>Kao, Shou-Yen; Taipei Veterans General Hospital, Division of Dental medicine, Department of Medicine |
| <b>Primary Subject Heading</b>: | Medical education and training                                                                                                                                                                                                                                                                                                                                                                                                                                                                                                                                                                                                                                                                                                                                                                                                                                                                                        |
| Secondary Subject Heading:      | Communication                                                                                                                                                                                                                                                                                                                                                                                                                                                                                                                                                                                                                                                                                                                                                                                                                                                                                                         |
| Keywords:                       | nurses, pharmacists, inter-professional collaboration, interdisciplinary education perception, attitudes towards health care teams                                                                                                                                                                                                                                                                                                                                                                                                                                                                                                                                                                                                                                                                                                                                                                                    |
|                                 |                                                                                                                                                                                                                                                                                                                                                                                                                                                                                                                                                                                                                                                                                                                                                                                                                                                                                                                       |

SCHOLARONE™  
Manuscripts

1  
2  
3 Simulation based inter-professional education to improve attitudes towards  
4 collaborative practice: a prospective comparative pilot study in a Chinese medical  
5 center  
6  
7

8  
9  
10 Ling-Yu Yang,<sup>2</sup> Ying-Ying Yang,<sup>1,3,5</sup> Chia-Chang Huang,<sup>1,3,5</sup> Jen-Feng Liang,<sup>2,5</sup>  
11 Fa-Yauh Lee,<sup>3,5</sup> Hao Min Cheng,<sup>2,5</sup> Chin-Chou Huang,<sup>1,3,5</sup> Shou-Yen Kao,<sup>3,5</sup>  
12  
13

14  
15 <sup>1</sup>Division of Clinical Skills Training, <sup>2</sup>Department of Medical Education, <sup>3</sup>Department  
16 of Medicine, <sup>4</sup>Taipei Veterans General Hospital, Taipei, Taiwan  
17

18 <sup>5</sup>Department of Medicine, National Yang-Ming University, Taipei, Taiwan  
19

20 **Correspondence to**

21 Ying-Ying Yang; [yangyy@vghtpe.gov.tw](mailto:yangyy@vghtpe.gov.tw)  
22  
23  
24  
25  
26  
27  
28  
29  
30  
31  
32  
33  
34  
35  
36  
37  
38  
39  
40  
41  
42  
43  
44  
45  
46  
47  
48  
49  
50  
51  
52  
53  
54  
55  
56  
57  
58  
59  
60

**ABSTRACT**

**Objectives:** Inter-professional education (IPE) builds inter-professional collaboration (IPC) attitude/skills of health professionals. This interventional IPE program evaluates whether benchmarking sharing can successfully cultivate seed instructors responsible for improving their team members' IPC attitudes.

**Design:** Prospective, pre-post comparative cross-sectional pilot study.

**Setting/participants:** 34 physicians, 30 nurses and 24 pharmacists, who volunteered to be trained as seed instructors participated in 3.5-hr preparation and 3.5-hr simulation courses. Then, participants (n=88) drew lots to decide 44 presenters, half of each profession, who needed to prepare IPC benchmarking and formed Group 1. The remaining participants formed Group 2 (regular). Facilitators rated the Group 1 participants' degree of appropriate transfer and sustainable practice of the learnt IPC skills in the workplace according to successful IPC examples in their benchmarking sharing.

**Results:** For the three professions, improvement in IPC attitude was identified by sequential increase in the post-course (2<sup>nd</sup> month, T<sub>2</sub>) and end-of-study (3<sup>rd</sup> month, T<sub>3</sub>) Interdisciplinary Education Perception Scale (IEPS) and Attitudes Towards Health Care Teams Scale (ATHCTS) scores, compared to pre-course (1<sup>st</sup> month, T<sub>1</sub>) scores. By IEPS and ATHCTS-based assessment, the degree of sequential improvements in IPC attitude was found to be higher among nurses and pharmacists than in physicians. In benchmarking sharing, the facilitators' agreement about the degree of participant's appropriate transfer and sustainable practice learnt "communication and teamwork" skills in the workplace were significantly higher among pharmacists and nurses than among physicians. The post-intervention random sampling survey (6<sup>th</sup> month, T<sub>post</sub>) found that the IPC attitude of three professions improved after on-site IPC skill promotion by new program-trained seed instructors within teams.

**Conclusions:** Addition of benchmark sharing to a diamond-based IPE simulation program enhances participants' IPC attitudes, self-reflection, workplace transfer and practice of the learnt skills. Furthermore, IPC promotion within teams by newly trained seed instructors improved the IPC attitudes across all three professions.

**Keywords:** nurses, pharmacists, inter-professional collaboration, interdisciplinary education perception, attitudes towards health care teams

**Strengths and limitations of this study**

- This pilot study describes the experiences of a prospective cross-sectional cohort of physicians, nurses and pharmacists who volunteered to receive serial benchmarking-enhanced diamond-based IPE simulation program for cultivating them as seed instructors to improve team members' IPC attitude.
- In our IPE program, IPC benchmarking sharing was implemented to enhance participants' continual motivation to self-reflect and to promote IPC among team members.
- Using IEPS and ATHCTS, our study reveals the significant improvements in participant's motivation and IPC attitude across three professions after receiving training with our new IPE program.
- Through IPC benchmarking presentation, participants' appropriate transfer and sustainable practice of the learnt IPC skills in the workplace was evaluated.
- Although participant's satisfaction with the new program and the degree of improvement in participant's competencies were not evaluated in our study.
- At this stage, the use of newly acquired knowledge or skills by medical professionals of our institution was not evaluated in our study.
- These results were limited to experience in one institution; the degree to which this can be extrapolated to IPE training in other institutions is not known.

## INTRODUCTION

Inter-professional education (IPE) aims to improve the coordination, communication, teamwork and leadership skills of health professionals by learning with, from and about each other.<sup>1</sup> Two key families of learning theory behaviorism and constructivism were applied to the curriculum design of IPE.<sup>2,3</sup> It has been reported that learning theories for IPE are not mutually exclusive. In fact, theorists agree that inter-professional learning “by doing” combined with learner centeredness is the key.<sup>2,3</sup> Health care simulations are recognized as an ideal vehicle for IPE.<sup>4</sup> Today's patients have complex chronic health issues that need inter-professional collaboration (IPC) in order to deliver well-coordinated, high-quality and patient-centered care.<sup>5,6</sup> Simulation-enhanced IPE helps the development of a health professional's IPC skills and these are very important when managing critical clinical situations.<sup>7</sup>

Baker, *et al.* reported that 2-hour cardiac resuscitation/intravenous access simulation-based IPE prepared medical students, nursing students and junior medical residents for their future as practitioners.<sup>8</sup> In their study, immediate attitudinal scores and responses by means of an Interdisciplinary Education Perception Scale (IEPS) survey were consistently positive among both medical and nursing students.<sup>8</sup> Undre *et al.* reported that, using technical and human factors rating scales, trainers and multidisciplinary trainees assessed the crisis scenarios-based simulation training favorably, especially in technical skills.<sup>9</sup> Paige *et al.* revealed that in a 3-hour simulation-based interdisciplinary operating room, IPE significantly improve the trainees' self-efficacy teamwork performance in role clarity, anticipatory response, cross monitoring, team cohesion and interaction.<sup>10</sup> In Vyas *et al.* study, using the team building and inter-professional communications survey, pharmacy students reported that semi-urgent situations simulation-based IPE increased their understanding of professional roles and the importance of inter-professional communication.<sup>11</sup>

In Estis *et al.* study, using an attitudinal survey, speech language pathology, cardio-respiratory care and nursing students reported that simulation-based IPE enhanced their knowledge of medical professional roles/responsibilities and teamwork skills of caring for tracheostomy patients with speaking valves.<sup>12</sup> Nevertheless, participants in the Estis *et al.* study suggested that pre-simulation training and more structural interaction during the debriefing phase were likely to enhance effective of the IPE.<sup>12</sup> Specifically, Watters *et al.* implemented a debrief diamond, following description-analysis-application steps, during a 1-day simulation IPE course.<sup>13</sup> The standardized debrief diamond was designed to allow high-quality exploration of the non-technical aspects of a simulated scenario. The diamond is a two-sided prompt sheet: the first contains the scaffolding, with a series of constructed questions for each phase of the debriefing; while the second lays out the theory behind the questions and the process.<sup>13,14</sup> In Watters *et al.* study, using self-efficacy questionnaires, doctors and nurses reported that diamond-based simulation increased their confidence in “communication and teamwork” skills.<sup>13</sup> Darlow *et al.* reported that addition of a preparation workshop to their 11-hour IPE program resulted in improved attitudes towards inter-professional teams and inter-professional learning, as well as self-reported ability to function within an inter-professional team.<sup>15</sup>

Taken together, previous simulation-based IPE studies<sup>8-15</sup> were lacking in post-course continuous training. In addition, there is an absence of long-term follow-up that allows the transference and sustainability of IPC practice to be assessed. Furthermore, there is an absence in these studies of opportunities for the participants

1  
2  
3  
4  
5  
6  
7  
8  
9  
10  
11  
12  
13  
14  
15  
16  
17  
18  
19  
20  
21  
22  
23  
24  
25  
26  
27  
28  
29  
30  
31  
32  
33  
34  
35  
36  
37  
38  
39  
40  
41  
42  
43  
44  
45  
46  
47  
48  
49  
50  
51  
52  
53  
54  
55  
56  
57  
58  
59  
60

to reflect on their training after a period of IPC practice. In 2014, a random sampling survey of three professions at our institution revealed that IPC attitudes of physician, nurses and pharmacists need to be improved (Figure 1).

It is important to develop feasible continuous IPE/IPC strategies to solve the problems of previous studies<sup>8-15</sup> and of our survey. Therefore, our education committee targeted these three professions and organized a new IPE program characterized by pre-simulation training, post-course continuous training, and immediate plus delayed IPC attitude assessments. Additionally, post-training e-learning platform and IPC benchmarking sharing provide an opportunity for additional/deepening learning of inter-professional problem solving skills. Benchmarking sharing, a good indicator of organizational seriousness about quality, is a continuous quality improvement approach. Healthcare benchmarking sharing provides opportunities for inter-professional participants to learn from others and develop innovative collaborative clinical care.<sup>16,17</sup> This pilot intervention intentionally evaluates its impact on cultivating new health professionals as seed instructors to promote IPC within their teams.



## METHODS

### Participants and setting

Between January 2015 and May 2016, we conducted a prospective cross-sectional comparative study at the high-fidelity clinical simulation and interactive learning center of TVGH; this center trains around 2500 staff each year. Taipei Veterans General Hospital (TVGH) is a 3000-bed medical center providing primary and tertiary care to active-duty and retired military personnel and their dependents, and the general public. Meanwhile, TVGH is the teaching hospital for several medical universities in Northern Taiwan.

Health professionals having more than 1 year but less than 4 years of clinical work experience were invited to participate in this study. The participants volunteering to be trained (n=94) were invited to join the 2015 pilot benchmarking-enhanced diamond-based IPE simulation courses to improve their IPC attitudes. After excluding six participants due to incomplete questionnaires, a total of n=88 individuals were included in this study. They consisted of physicians (n=34), nurses (n=30) and pharmacists (n=24).

Ethical approval (2015-06-017CC) was obtained from the Ethics committee of our institution and care was taken to apply the World Medical Association Declaration of Helsinki principles to the research.

### Time points of serial assessments

After a brief introduction, the participants were asked to complete the on-line pre-course self-assessment on attitudes to IPC in the pre-course survey (T<sub>1</sub>). Each on-line self-assessment was numbered so that participants remained anonymous but their numbers could be used to match their pre-course (T<sub>1</sub>) self-assessment with post-course (T<sub>2</sub>) and end-of-study (T<sub>3</sub>) self-assessment (Figure 1). All participants continued with their usual professional clinical routine throughout the 3-month interventional study.

### IPC attitude's self-assessments

In our study, we measured participants' IPC attitudes with Interdisciplinary education perception scale<sup>18-20</sup> (IEPS, supplemental Table 1), and the Attitudes Toward Health Care Teams Scale<sup>21</sup> (ATHCTS, supplemental Table 2).

Additionally, participants were asked to provide qualitative feedback freely by answering the single-open-ended question, "*what is the one thing you are going to take away with you at the end of this course?*" in the online post-courses self-assessment (T<sub>3</sub>). This question was designed to prompt a participant to reflect on their own learning during the course and allowed the program director to gather evidence on which elements within the courses seemed to be contributing the most to the learning experience.

### Benchmarking-enhanced diamond-based IPE simulation courses

Each participant attended a 3.5-hour preparation courses (T<sub>1</sub>) in the first month of this study (Figure 1). Subsequently, a 3.5-hour simulation courses was arranged for the participants during the second month (T<sub>2</sub>). At the end of the simulation courses, participants drew lots to decide who needed to prepare for post-course IPC benchmarking at the third month (T<sub>3</sub>) of study (*i.e.*, who was in Group 1). In order to maintain a fixed ratio (34:30:24) among the three professions (Figure 1), half (17:15:12) of the physicians, nurses and pharmacists were selected as Group 1 (benchmarking) and the others as Group 2 (regular).

1  
2  
3 (1). *Facilitators training and DAA debrief diamond*

4 All facilitators received serial sessions training in how to use the debrief  
5 diamond and to gain a consensus on how to rate their agreement about the degree of  
6 participants appropriate transfer and sustainable practice of the trained “coordination,  
7 communication, teamwork, and leadership” skills regarding IPC in the workplace  
8 using real examples in their benchmarking sharing. In particular, the  
9 Description-Analysis-Application (DAA) debrief diamond was used to involve  
10 participants in preparation (T1) and simulation (T2) courses. The “description” step  
11 involved ‘description’ of each profession's IPC performance in the simulation  
12 scenario, along with more challenging “analysis” and “application” steps involving  
13 ‘how did participants feel about each profession's IPC performance in simulation  
14 scenario?’ and “how participants may apply the learnt knowledge from IPC  
15 simulation scenarios in their own clinical practice”.<sup>13,14</sup>

16  
17  
18 (2). *7-hour preparation and simulation workshop*

19 *-Preparation courses (T<sub>1</sub>).* In accordance with previous study design,<sup>15</sup> two  
20 small-group preparation workshops were held on two consecutive days as shown in  
21 Figure 2. The simulated examples of IPC-based care from a previous study<sup>11</sup> were  
22 revised by an education committee and made into three video clips for IPE. They  
23 were, first, a simulation of a distracted wife and a 61-year-old male with dyspnea,  
24 who suffered from recurrent asthmatic attacks due to inappropriate home medication;  
25 second, a simulation of a 35-year-old family group who were anxious, about the  
26 pregnant woman who had nausea/vomiting/abdominal pain, who needed anti-emetics  
27 suitable for her condition and a pediatrics/gynecology consultation in an ER setting  
28 and, finally, a simulation of a 57-year-old male with chest pain, with a distraught son  
29 and with the wrong allergy and ID labeling on his arm band; and the fourth simulation  
30 was an unlocked bed in an ICU setting. These 10-minutes clips provided a basis for  
31 post-video viewing discussions that were led by inter-professional facilitators  
32 following a Diamond DAA debriefing of 1-hour; these clips targetted the roles and  
33 value of each member of the IPC healthcare team involved in the simulated clinical  
34 scenarios presented in the three videos.<sup>13,14</sup>

35  
36  
37 *-Simulation courses (T<sub>2</sub>).* In our simulation centers, four small-group workshops  
38 were held in four rooms within two consecutive days (Figure 2). Using the clinical  
39 scenario outlined below, workshops were led by well-trained IPE facilitators from  
40 dietetics, social workers and respiratory therapists. This scenario, which incorporated  
41 multi-disciplinary care, was modified in a previous study<sup>12</sup> and had a practice run  
42 before formally being used. A patient scenario involving Mr. Jason was developed  
43 collaboratively by the faculty members of the aforementioned professions.  
44 Participants were given the following information:

45 *Mr. Jason has a history of chronic obstructive pulmonary disease (COPD), smokes 60*  
46 *packs per year of cigarettes and has hypertension, diabetes, coronary artery disease*  
47 *and atrial fibrillation. He has been admitted with an acute exacerbation of his COPD*  
48 *five times over the past year. Home medication includes aspirin, a calcium channel*  
49 *blocker, mycolytic agents, inhalation corticosteroid/bronchodilator (combined) and*  
50 *insulin for subcutaneous administration. Mr. Jason was admitted 3 weeks ago for*  
51 *emergency coronary artery bypass grafting surgery. Although there has been*  
52 *aggressive management with regular chest therapy, he has had difficulty being*  
53 *weaned from the ventilator due to poor ability to expectorate sputum and his*  
54 *malnutrition. The primary care teams now are considering a tracheostomy and*  
55 *intensive physical therapy and nutrition therapy. His family members are at the*  
56 *bedside. During the simulation, a pre-set intubated high-fidelity SimMan® 3G*

1  
2  
3 simulator acted as the patient and standardized patients (SPs) were used as his family.  
4 Then, the 3.5-hour courses were ran (Figure 2).

5 Before the beginning of the simulation, the participants were presented with the  
6 case's name, age, gender, admission diagnosis and current medication/management. In  
7 the three simulation phases, the participants involved were expected to carry out  
8 assessment, treatments, and general care of the patients, collaboratively. Then, the  
9 participants began the post-simulation debriefing phase and reflected on the  
10 challenges, pitfalls, and successes that occurred within the simulation.

11 (3). The IPC benchmarking ( $T_3$ ) of the Group 1 participants.

12 As mentioned above, 17 physicians, 15 nurses and 12 pharmacists formed Group  
13 1 and these participants underwent IPC benchmarking sharing. Presenters were asked  
14 to give their four examples of appropriately transfer and sustainable practice learnt  
15 IPC skills in the workplace. Randomly, four small groups ( $n=11$ ) with ratio (4:4:3,  
16 4:4:3, 4:4:3 and 5:3:3) of physician to nurse to pharmacists were presented in four  
17 rooms over two consecutive days. During benchmarking sharing, two facilitators rated  
18 their 5-point Likert-scale-based agreement to the presenters' degree of appropriate  
19 transfer and sustainable practice of the learnt IPC skills in the workspace according to  
20 their four success examples. In each room, 4 hours (240 minutes) were needed for 11  
21 presenters to complete their 20-minutes presentation (15-min.)/discussion (5-min.).  
22 Each presentation was video recorded by teaching assistants (TAs) to help with  
23 continuous IPC promotion. With the agreement of the presenters, the TAs uploaded  
24 edited versions of the video to the e-learning platform. The Group 2 participants were  
25 asked to join this end-of-study ( $T_3$ ) IPC benchmarking sharing.

### 26 e-learning platform

27 Both the Group 1 and Group 2 participants were invited to use a common IPE  
28 e-learning platform containing the aforementioned scenario, various Power-point  
29 presentations, the video used in the preparation/simulation workshop and the video  
30 from the IPC benchmarking to encourage self-directed learning.

### 31 Pre-intervention ( $T_{pre}$ ) and Post-intervention ( $T_{post}$ , 6<sup>th</sup> month) random sampling 32 survey of IPC attitudes (Figure 1)

33 Using IPC core elements-based questionnaires (supplement Table 3), across the  
34 three professions, the effectiveness of the well-trained seed instructors was evaluated  
35 by comparing the differences between  $T_{pre}$  and  $T_{post}$ ' IPC attitude scores<sup>22-24</sup>.

### 36 Analysis

37 Outcomes of our new training program were analyzed according to Kirkpatrick  
38 levels.<sup>25</sup> Since the IEPS and ATHCTS items are ordinal in nature, Wilcoxon's signed  
39 rank test was used to analyze each item. The means of the overall IEPS score and the  
40 four subscales were evaluated with the Student's two-tailed paired  $t$ -test for  
41 continuous measures, with the aim of detecting any differences between  $T_1$  and  $T_2$  as  
42 well as  $T_2$  and  $T_3$  time-points. Data from the IEPS and ATHCTS were matched by  
43 profession for analysis with one-way ANOVA or Mann-Whitney U test to detect the  
44 significant difference between and/or among groups.

## RESULTS

The baseline characteristics of the participants, including mean age, gender and clinical experiences, were similar across the physicians, nurses and pharmacists as can be seen in Table 1. A higher percentage of pharmacists (45%/43%) and nurses (35%/36%) had experienced receiving previous IPE training and higher frequency of exposure to IPC meeting during their previous year of clinical works than physicians (15%/14%) (Table 1). In other words, in comparison with nurses and pharmacists, a lower percentage of physicians belong to the high-exposure (>80% exposure to monthly IPC meeting/1-year) group, which indicates the physician's had less experience with IPC meeting participation during their last 1-year of clinical work

**Table 1 Baseline characteristics of study population (n=88)**

|                                                                                                                                                    | Physicians<br>(n=34) | Nurses<br>(n=30) | Pharmacists<br>(n=24) |
|----------------------------------------------------------------------------------------------------------------------------------------------------|----------------------|------------------|-----------------------|
| Age (years)                                                                                                                                        | 31.3± 2.7            | 29.1 ±4.8        | 30.5 ±3.6             |
| Female/male (No.)                                                                                                                                  | 30/4                 | 27/3             | 10/14                 |
| Percentage of distribution of clinical-work-year of participants among groups                                                                      |                      |                  |                       |
| 1-2/2-3/ 3-4 years (%)                                                                                                                             | 76/14/10%            | 84/10/6%         | 69/20/11%             |
| Percentage of distribution of participants with and without experience of receiving previous IPE training                                          | 15/85% <sup>#</sup>  | 35/65%           | 45/55%                |
| Percentage of distribution of participants with high/low frequency of exposure to IPC meeting during their last 1-yr of clinical work among groups |                      |                  |                       |
| Percentage of ‡high-exposure participants                                                                                                          | 14% <sup>#</sup>     | 36%              | 43%                   |
| Percentage of † low-exposure participants                                                                                                          | 86% <sup>#</sup>     | 64%              | 57%                   |

<sup>#</sup>p<0.01 vs. corresponding nurse's/pharmacist's group; ‡high-exposure participants indicated individual that participating more than 80% of monthly IPC meeting; †low-exposure participants indicated individual that participating less than 20% of monthly IPC meeting.

### *Good internal consistency of the IEPS/ATHCTS and its subscales*

In this study, the Cronbach's alpha coefficients of IEPS overall scales (0.721), competency and autonomy subscales (0.69), Perceived need for cooperation subscales (0.73), Perception of actual cooperation subscales (0.85) and Understanding others values subscales (0.662) were good. Meanwhile, Cronbach's alpha of ATHCTS overall scales (0.719), Quality of care delivery subscales (0.683), Patient-centered care subscales (0.801) and Team efficiency subscales (0.724) were acceptable.

### *Nurses and pharmacists had greater improvement of IEPS and ATHCTS scores than physicians*

The baseline IPC attitude, pre-course (T<sub>1</sub>) IEPS scores and pre-course (T<sub>1</sub>) ATHCTS scores were also similar across the physicians, nurses and pharmacists (Table 2). Compared to nurses, there were lower scores for the “competency and autonomy” and “understanding others values” basal IEPS subscales (T<sub>1</sub>) among the physicians. Similarly, also compared to nurses, there were lower scores for the “competency and autonomy” and “perception of actual cooperation” basal IEPS subscales (T<sub>1</sub>) among the pharmacists. Notably, the “competency and autonomy” subscale of IEPS score and the “team efficiency” subscale of the ATHCTS score (T<sub>2</sub>-T<sub>1</sub>) were increased by the 7-hour stepwise simulation-enhanced IPE course across the three professions. In particular, the magnitude of increase in IEPS and ATHCTS scores were significantly greater among the nurses and pharmacist than among the

1  
2  
3 physicians (Table 2). Clearly, pharmacists had greater increase in percent change of  
4 post-courses ( $T_2$ ) ATHCTS score from pre-courses ( $T_1$ ) score than nurses or  
5 physicians (Table 2).  
6  
7  
8  
9  
10  
11  
12  
13  
14  
15  
16  
17  
18  
19  
20  
21  
22  
23  
24  
25  
26  
27  
28  
29  
30  
31  
32  
33  
34  
35  
36  
37  
38  
39  
40  
41  
42  
43  
44  
45  
46  
47  
48  
49  
50  
51  
52  
53  
54  
55  
56  
57  
58  
59  
60

For peer review only

1  
2  
3  
4  
5  
6  
7  
8  
9  
10  
11  
12  
13  
14  
15  
16  
17  
18  
19  
20  
21  
22  
23  
24  
25  
26  
27  
28  
29  
30  
31  
32  
33  
34  
35  
36  
37  
38  
39  
40  
41  
42  
43  
44  
45  
46  
47  
48  
49

|                                                                                                                                                                                | Physicians (n=34)            |                               | Nurses (n=30)                |                               | Pharmacists (n=24)          |                               |
|--------------------------------------------------------------------------------------------------------------------------------------------------------------------------------|------------------------------|-------------------------------|------------------------------|-------------------------------|-----------------------------|-------------------------------|
|                                                                                                                                                                                | pre-course (T <sub>1</sub> ) | post-course (T <sub>2</sub> ) | pre-course (T <sub>1</sub> ) | post-course (T <sub>2</sub> ) | pre-course(T <sub>1</sub> ) | post-course (T <sub>2</sub> ) |
| <b>Total IEPS-18 scores [6-point scale]</b>                                                                                                                                    | 56±1.8 <sup>#</sup>          | 76±9.8 <sup>*,#</sup>         | 65±1.6                       | 91±1.2                        | 64±8                        | 91±4.7 <sup>*</sup>           |
| percent change of total IEPS post-course (T <sub>2</sub> ) score from pre-course (T <sub>1</sub> ) score                                                                       |                              | 18%                           |                              | 40% <sup>†</sup>              |                             | 42% <sup>†</sup>              |
| <b>IEPS subscales scores</b>                                                                                                                                                   |                              |                               |                              |                               |                             |                               |
| Competency and autonomy (8 items)                                                                                                                                              | 24±3.5 <sup>#</sup>          | 28±4.1 <sup>*,#</sup>         | 30±4.5                       | 39±7.2 <sup>*</sup>           | 22±5.4                      | 40±6.1 <sup>*</sup>           |
| Perceived need for cooperation (2 items)                                                                                                                                       | 7±2.2                        | 9±1.6                         | 8±2.9                        | 10±1.8                        | 9±3                         | 11±1.8                        |
| Perception of actual cooperation (5 items)                                                                                                                                     | 17±2.7                       | 24±3.7 <sup>*,#</sup>         | 15±1.2                       | 26±4.3 <sup>*</sup>           | 20±4.8                      | 23±2.5                        |
| Understanding others values (3 items)                                                                                                                                          | 8±2.4 <sup>#</sup>           | 15±2.9 <sup>*</sup>           | 12±3.8                       | 16±1.4                        | 13±2.1                      | 17±5.1 <sup>*</sup>           |
| <b>Total ATHCTS-14 [5-point scale]</b>                                                                                                                                         | 39±2.3                       | 48±5.4 <sup>*</sup>           | 38±2.6                       | 51±4.6                        | 32±3.7                      | 54±7.5                        |
| Percent change of total ATHCTS post-course (T <sub>2</sub> ) score from pre-course (T <sub>1</sub> ) score                                                                     |                              | 23%                           |                              | 34% <sup>†</sup>              |                             | 69% <sup>†</sup>              |
| <b>ATHCTS subscales scores</b>                                                                                                                                                 |                              |                               |                              |                               |                             |                               |
| Quality of care delivery (5 items)                                                                                                                                             | 14±2.2                       | 15±1.8 <sup>#</sup>           | 13±1.6                       | 18±4.1 <sup>*</sup>           | 12±4.2                      | 20±2.0 <sup>*</sup>           |
| Patient-centered care (4 items)                                                                                                                                                | 13±1.7                       | 18±2.1 <sup>*</sup>           | 15±7.4                       | 19±3.3                        | 11±2.8                      | 18±3.5 <sup>*</sup>           |
| Team efficiency (5 items)                                                                                                                                                      | 12±1.1                       | 15±3.7 <sup>*</sup>           | 10±1.9                       | 14±2.7 <sup>*</sup>           | 9±2.6                       | 16±4.1 <sup>*</sup>           |
| Data were expressed as mean±SD; * <i>p</i> <0.01 vs. pre-course scores; # <i>p</i> <0.01 vs. corresponding nurse's/pharmacists score's; † <i>p</i> <0.01 vs. physicians scores |                              |                               |                              |                               |                             |                               |

**Participants demonstrated appropriate transfer of the learnt IPC skills in the workplace and sustainable practice of the skills after training**

Based on the real examples in IPC benchmarking presentations of Group 1 participants, the facilitators found that physicians were more appropriately able to transfer and sustainably practice of the learnt IPC “coordination and leadership” skills in the workspace than pharmacists and nurses (Table 3).

**Table 3 Comparison of facilitators' agreement to group 1 participant's degree of appropriate transfer and sustainable practice of the learnt IPC skills in workplaces according to four success examples in their benchmarking sharing**

|           |                                                                                  | Physicians<br>(n=17) | Nurses<br>(n=15)      | Pharmacists<br>(n=12) |
|-----------|----------------------------------------------------------------------------------|----------------------|-----------------------|-----------------------|
| Example 1 | [1-1].Presenter transfers the “coordination” skills appropriately in workplaces  | 4.3±0.64             | 3.6±0.7 <sup>#</sup>  | 3.9±0.8 <sup>#</sup>  |
|           | [1-2].Presenter practices the “coordination” skills sustainably in workplaces    | 4.6±0.54             | 3.3±0.21 <sup>#</sup> | 4.1±0.7 <sup>#</sup>  |
| Example 2 | [2-1].Presenter transfers the “communication” skills appropriately in workplaces | 3.9±0.52*            | 4.1±0.94              | 4.4±0.7               |
|           | [2-2].Presenter practices the “communication” skills sustainably in workplaces   | 3.3±0.71*            | 4.01±0.76             | 4.8±0.1               |
| Example 3 | [3-1].Presenter transfers the “teamwork” skills appropriately in workplaces      | 3.4±0.502*           | 4.5±0.46              | 4.1±0.9               |
|           | [3-2].Presenter practices the “teamwork” skills sustainably in workplaces        | 3.8±0.2*             | 4.7±0.1               | 4.5±0.6               |
| Example 4 | [4-1].Presenter transfers the “leadership” skills appropriately in workplaces    | 4.4±0.803            | 3.4±0.61 <sup>#</sup> | 4.0±0.5 <sup>#</sup>  |
|           | [4-2].Presenter practices the “leadership” skills sustainably in workplaces      | 4.7±0.4              | 3.0±0.3 <sup>#</sup>  | 3.8±0.4 <sup>#</sup>  |

Data were expressed as mean±SD; Presenters were asked to present their four examples according to the sequences of items listed above. Sequentially, benchmarking' Example 1 for Item 1-1&1-2, example 2 for item 2-1&2-2, Example 3 for Item 3-1&3-2, Example 4 for Item 4-1&4-2 were presented. By consensus meeting, facilitators rate their agreement to the items 1-1 and 1-2 according to the Example 1 of presenter, Items 2-2 and 2-2 from Example 2, Item 3-1 and 3-2 from Example 3, Items 4-1 and 4-2 from Example 4 in separate rooms. The results are averaged data of ratings completed by two facilitators for the presenter's performance of each item in above checklist; #p<0.05 vs. physician's group; \*p<0.05 vs. nurse's/pharmacist's group.

In benchmarking sharing, the inter-rater reliability (Kappa statistics) of facilitators for the items used to assess whether participants were able to transfer and sustainably practice the learnt IPC skills was good (Table 4).

**Table 4 Inter-rater reliability of facilitators' ratings in benchmarking sharing of Group 1 participants**

|                                                                                 | Physicians | Nurses | Pharmacists |
|---------------------------------------------------------------------------------|------------|--------|-------------|
|                                                                                 | Kappa      | Kappa  | Kappa       |
| [1-1].Presenter transfers the “coordination” skills appropriately in workplaces | 0.73       | 0.71   | 0.85        |

|                                                                                                                                                                                                |       |       |       |
|------------------------------------------------------------------------------------------------------------------------------------------------------------------------------------------------|-------|-------|-------|
| [1-2].Presenter practices the “coordination” skills sustainably in workplaces                                                                                                                  | 0.67  | 0.843 | 0.76  |
| [2-1].Presenter transfers the “communication” skills appropriately in workplaces                                                                                                               | 0.69  | 0.82  | 0.89  |
| [2-2].Presenter practices the “communication” skills sustainably in workplaces                                                                                                                 | 0.71  | 0.79  | 0.77  |
| [3-1].Presenter transfers the “teamwork” skills appropriately in workplaces                                                                                                                    | 0.683 | 0.679 | 0.711 |
| [3-2].Presenter practices the “teamwork” skills sustainably in workplaces                                                                                                                      | 0.78  | 0.812 | 0.79  |
| [4-1].Presenter transfers the “leadership” skills appropriately in workplaces                                                                                                                  | 0.72  | 0.77  | 0.849 |
| [4-2].Presenter practices the “leadership” skills sustainably in workplaces                                                                                                                    | 0.83  | 0.74  | 0.816 |
| Two facilitators for each small-group [n=11, either with 4:4:3, 4:4:3, 4:4:3, 5:3:3 ratio of physician: nurse: pharmacists] benchmarking sharing held in four rooms over two consecutive days. |       |       |       |

### ***Participants gave positive descriptive feedbacks to the trainings***

In open-ended questions at the end of our study, most participants reported that watching the IPE-specific video and discussing it, as well as viewing the uploaded videos on the e-learning platform, markedly encouraged their motivation to improve their IPC attitude. Specifically, the participant’s reported that having access to an IPE/IPC-specific e-learning platform was able to improve the users' IPC attitude continuously by providing useful resources and instruction.

Selected completed feedback responses by the participants to the open-ended items of post-course self-assessment (T3) are listed below.

1. Benefits of our new benchmarking-enhanced debrief diamond-based IPE simulation courses.

*“This IPE course improves inter-professional relationships, communication skills, efficiency in holistic patient care and service delivery, team work, respect for one another and builds confidence in my profession.”*

2. Identified IPE/IPC elements in collaborative training.

*“We are all geared to patient-centered care, all professions need to use their best assessment and judgment to evaluate patients in order to provide the best patient care that we can.”*

*“We understand that there is a lot of team work going on our institution.”*

*“We understand that all professions should be encouraged within their training program to become independent in order to make IPC work better.”*

3. Improved skills of quality of clinical care.

*“There are situations that are different, but we do have to rely on the expertise of other professionals' in order to obtain the best outcome for the patient.”*

*“We were able to collaborate very well with other professional health care members, especially with the nurses in their second simulation; they sort of referred to us regarding our drug management skills and sort of learned how important pharmacists can actually be in a hospital setting.”*

4. Skills learnt from their skillful facilitators.

*“Sometimes, staying in your own profession is great and everything, but you really sort of need to reach outwards and see what other professions have to offer; because only if you do that can you truly use the entire knowledge base of other professions and provide the*



1  
2  
3 *best patient care.”*  
4

5 ***Addition of benchmarking sharing to enhance the continuous beneficial effects of training***

6 Compared to pre-courses (T<sub>1</sub>) scores, the degree of increase in total IEPS and ATHCTS  
7 scores at post-courses (T<sub>2</sub>) self-assessments were not different between Group 1 and 2  
8 participants (data not shown). Among the Group 1 and 2 participants, similar or higher  
9 end-of-study (T<sub>3</sub>) IEPS and ATHCTS scores than post-courses (T<sub>2</sub>) scores indicated the  
10 sustained effects of 7-hour simulation-based debrief diamond-enhanced IPE courses (Figure  
11 3). From the post-course (T<sub>2</sub>) to end-of-study (T<sub>3</sub>) period, a significantly greater increase in  
12 the total IEPS and ATHCTS scores of the group 1 (benchmarking) participants than for the  
13 Group 2 (regular) participants can be seen (Figure 3). This indicates the additional benefits of  
14 IPC benchmarking on the Group 1 participants' IPC attitude. Among the  
15 benchmarking-group' participants, the most improved items were the “competency and  
16 autonomy” and “perception of actual cooperation” subscales of the IEPS and the “quality of  
17 care delivery” and “team efficiency” subscales of the ATHCTS, when the T<sub>2</sub> and T<sub>3</sub>  
18 self-assessments were compared.  
19  
20  
21

22 ***Improvement of IPC attitudes among team members of three professions by the promotion***  
23 ***of new intervention-trained seed instructors***

24 In total, 132 valid T<sub>post</sub> questionnaires were collected for comparison with another 132  
25 valid T<sub>pre</sub> questionnaires. These anonymous T<sub>pre</sub> and T<sub>post</sub> questionnaires were completed by  
26 random members sampled twice from the three professions, namely 51 physicians, 45 nurses  
27 and 36 pharmacists. In other words, the individuals who responded to the online IPC attitude  
28 survey might be but are not necessarily different between T<sub>pre</sub> and T<sub>post</sub> survey. Nonetheless, it  
29 is important to note that the enrolled participants in our interventional study were excluded  
30 from the sampling pool for T<sub>post</sub> sampling survey.  
31

32 Among the randomly sampled team members, the pre-intervention survey (T<sub>pre</sub>) revealed  
33 that IPC attitudes across physicians, nurses and pharmacists must be improved in the aspects  
34 of IPC' familiarity, understanding of other professions' roles and benefits of IPC on quality of  
35 patient-centered care (Figure 3C). Across the three professions, after seed instructors began  
36 promoting IPC in the workplace, post-intervention (T<sub>post</sub>, 6<sup>th</sup> month) randomly sampled team  
37 members reported that they were familiar with IPC skills, agreed that IPC helped them to  
38 understand the role of other team members, agreed that IPC improved patient care quality and  
39 agreed that IPC improved team efficiency (Figure 3C). Interestingly, across the three  
40 professions of randomly sampled team members, the level of agreement to the statement of  
41 “IPC helps provide patient-centered care” were excellent both in the pre-intervention (T<sub>pre</sub>)  
42 and post-intervention (T<sub>post</sub>) surveys (Figure 3C).  
43  
44  
45  
46  
47  
48  
49  
50  
51  
52  
53  
54  
55  
56  
57  
58  
59  
60

## DISCUSSION

In addition to serial subjective and objective assessments, our IPE model is characterized by a debrief diamond strategy (Figure 2). Debriefing can help a learner clarify and integrate the simulation experience with their previous knowledge.<sup>8,10,11,22-24</sup> The debrief diamond encourages a standardized approach to high-quality debriefing across courses, which benefits both the participants and the involved faculty members.<sup>13,14</sup> The DAA debrief diamond is related to various aspects of the advocacy-inquiry approach and of debriefing with good judgment. The diamond provides an easy but pedagogically sound structure for facilitators to follow for specific post-simulation feedback and discussion. Nevertheless, the long-term effects of structured debriefing have not been thoroughly evaluated in previous simulated-enhanced IPE studies.<sup>8-15</sup>

When trying to improve each health professional's IPC attitude with limited resources, including the time needed to carry out the training, the number of faculty members needed to run the training and the facilities needed for the training, each newly-trained participant should act as a seed instructor within their team. In other words, successful training of seed instructors can result in profession-wide IPC promotion and attitude remodeling. In our study, this well-organized design allows each participant from three professions to have equal IPE exposure, which helps their development as seed instructors in their healthcare team.

By training volunteers from physicians, nurses and pharmacists, our interventional training program aims to change participants' behaviors and to act as seed instructors for promoting IPC in team member. In our study, the post-intervention survey, performed after the sequential simulation-based IPE courses, revealed that there was significant improvement in randomly sampled team members' IPC attitude across physicians, nurses and pharmacists.

The strengths of our pilot study are the extension of IPE via e-learning platform, benchmarking sharing and continuous self-evaluations. Previous studies have suggested that training videos consistently enhance the observational powers of trainees, as well as improving their ability to integrate different information and increasing their motivation to learn.<sup>25,26</sup> In our study, most participants reported that the availability of an e-learning platform that has sufficient IPE resources helps to continue their self-directed learning. Meanwhile, the benchmarking provides the enrolled participants with the opportunity for IPC self-reflection, as well as enhancing their motivation as seed instructors in their teams.

Primarily, this new simulation-based IPE program was intended to solve challenges, which included are lack of continuous training and follow-up, of previous studies<sup>8-13,15</sup> and those within our institution. Nevertheless, there were some limitations in our study that need to be altered and the method improved for any future study before determining the level of effectiveness of this pilot benchmarking-enhanced debrief diamond-based IPE program on health professionals IPC practices and outcomes.

For a training program, Kirkpatrick level 1 and 2 were the evaluation of "participants satisfaction" and "participants increase confidence, knowledge and performance". Using IEPS and ATHCTS, our study revealed significant improvements in participants' motivation and IPC attitudes across the three professions after receiving training with our new IPE program. The participant's satisfaction with the new program and the degree of improvement in participant' competency, however, was not evaluated in our study. Kirkpatrick levels 3 and 4 in our study were the "multiplication" of knowledge by "seeding" and its influence on the health care system. According to the actual case scenario used as the example in benchmarking sharing of our study, facilitators gave high ratings for their level of agreement with the participants' degree of appropriate transfer and sustainable practice of the learnt IPC skills to clinical works. The sequential improvements in participants' self-assessed IPC attitude scores also was noted in our study. Moreover, the comparison of pre-intervention and

1  
2  
3 post-intervention randomly sampled team members, who were non-participants, revealed the  
4 general improvement in their IPC attitudes and motivation. Nevertheless, for this part, the use  
5 of newly acquired knowledge or skills by medical professionals of our institution was not  
6 evaluated in our study. Taken together, our pilot study only achieved some of the goals of a  
7 training program, according to the Kirkpatrick 1-4 levels.<sup>27</sup>

8  
9 Our IPE approach targets IPC attitude specifically using a number of defined types of  
10 patient scenario that are suitable for all three of the enrolled professions. Nevertheless, the  
11 specific IPC skills required for holistic care of COPD cases clearly are different from those  
12 needed to care for acute renal failure cases. Undoubtedly, IPC skills are learned more readily  
13 when the simulation-enhanced IPE used is more relevant to the type of clinical situation. In  
14 our study, this limitation was alleviated by the multi-professional post-simulation debrief  
15 diamond-based debriefing during a 3.5-hour simulation workshop and the fact that the  
16 enrolled participants continued to carry out their regular clinical routines during the 3-month  
17 intervention period. In other words, our enrolled participants were likely interacting with  
18 other professions in their clinical routine after the first and second stimuli presented during  
19 the preparation and simulation workshops. In fact, it has been suggested that learning  
20 together with a variety of high-fidelity simulation modules in multi-professional groups  
21 would foster shared inter-professional collaborative (IPC) across many clinical situations.<sup>28-31</sup>

22  
23 As participation in this course was voluntary, participants were likely to be more highly  
24 motivated than non-participants, which may limit the generalizability of our results. Actually,  
25 the positive effects of the debrief diamond and preparation workshop had been reported in  
26 previous simulated-based IPE studies.<sup>13-15</sup> In our study, the lack of control groups without the  
27 debrief diamond method and preparation workshop, to exclude more effects of them on  
28 inter-professional skills, may still limit us to conclude the definite effectiveness of  
29 benchmarking-enhanced IPE on training. Both IEPS and ATHCTS have been suggested as  
30 reliable tools to assess the effectiveness of practice-based IPE interventions.<sup>19-21</sup> It has been  
31 validated that each subscale of IEPS and ATHCTS is a strong measurement for underlying  
32 IPC concepts that are crucial to medical professions.<sup>19-21</sup>

33  
34 Notably, the core elements in the constructive assessment tools, IEPS and ATHCTS,  
35 used in our studies were more focused on “communication and teamwork” than “coordination  
36 and leadership” skills.” Therefore, from Table 2, it seems that pharmacists and nurses perform  
37 better than physicians. Nonetheless, the facilitators' agreement for the degree of participant's  
38 appropriate transfer and sustainable practice of learnt “coordination and leadership” skills in  
39 the workplace were significantly higher among physicians than pharmacists and nurses in  
40 benchmarking sharing (Table 3). This might be caused by the culture where physicians take  
41 over the role of leadership in the healthcare system. These results remind educators to rethink  
42 strategies to balance inter-professional training.

## 43 44 45 **CONCLUSIONS**

46 Our benchmarking-enhanced debrief diamond-based IPE simulation program was able to  
47 cultivated participants as seed instructors to modify the IPC attitude of their team members.  
48 The results of this pilot study are promising and suggest that a future large-scale study with  
49 extension to professions other than the three professions enrolled here should be considered.  
50 As enhancement of inter-professional skills can ensure high-quality patient care, seed  
51 instructor training can be suggested as a personal development plan for every health  
52 professional.  
53  
54  
55  
56  
57  
58  
59  
60

1  
2  
3 **Acknowledgements** The authors express their gratitude to all members of the Clinical Skills  
4 Training Center, Department of Medical Education for their input for this article. We also  
5 gratefully appreciate professor Ralph Kirby and Joseph Harwood help us to correct the  
6 English writing of our manuscript.  
7  
8

9  
10 **Contributors** All authors have read and approved the final manuscript. Y-YY conceived and  
11 designed the study, analysis and interpretation of data, wrote the draft, recruited the study  
12 subjects, planned and performed the statistical analysis. H-MC made critical revision of  
13 manuscript. L-YY conceived and designed the study. C-CH recruited the study subjects,  
14 analysis and interpretation of data. J-FL acquisition, analysis and interpretation of data. F-YL  
15 study supervision, critical revision of manuscript. S-YK study supervision. C-CH acquisition  
16 of data. RK critical revision of manuscript.  
17  
18  
19  
20

21 **Funding** This work was supported by the government Ministry of Health and Welfare and  
22 Taiwan Association of Medical Education (TAME) and V105EA-005 of TVGH from the  
23 Taipei Veterans General Hospital, Taipei, Taiwan.  
24  
25

26 **Competing interests** None.  
27

28 **Data sharing statement** No additional data available.  
29  
30  
31  
32  
33  
34  
35  
36  
37  
38  
39  
40  
41  
42  
43  
44  
45  
46  
47  
48  
49  
50  
51  
52  
53  
54  
55  
56  
57  
58  
59  
60

## FIGURES AND LEGENDS

**Figure 1 The flow chart of this diamond-based inter-professional education (IPE) simulation study.** Detailed time points for trainings and assessment of this prospective pre-post comparative cross-sectional study.

**Figure 2 Protocols for small group preparation and simulation workshops.** The flow charts and detailed activities of first (preparation) and second (simulation) month' workshops, which were run in separate rooms over two consecutive days.

**Figure 3 Benchmarking-enhanced IPE pilot program improved participants and their team members' IPC attitudes.** The comparison of sequential changes of post-course ( $T_2$ ) and end-of-study ( $T_3$ ) subscales and scales of IEPS (A) and ATHCTS (B) between Group 1 (benchmarking) and Group 2 (regular) participants. (C). Comparison of responses from 132 randomly sampled members from the three professions (51 physicians, 45 nurses, 36 pharmacists) about attitudes to IPC in the pre-intervention ( $T_{pre}$ ) and post-intervention ( $T_{post}$ ) survey. IPC attitude was assessed by five Likert scale responses ranging from 1: strongly disagree to 5: strongly agree. \* $p < 0.01$  vs. post-course ( $T_2$ ) or pre-intervention ( $T_{pre}$ ) scores; # $p < 0.01$  vs. Group 2 participants' scores.

## REFERENCES

1. Frenk J, Chen L, Bhutta ZA. Health professionals for a new century: transforming education to strengthen health systems in an interdependent world. *Lancet* 2010;376(9756):1923-58.
2. Reeves S, Hean S. Why we need theory to help us better understand the nature of interprofessional education, practice and care. *J Interprof Care* 2013;27(1):1-3.
3. Hean S, Craddock D, O'Halloran C. Learning theories and interprofessional education: A user's guide. *Learn Teach Health Soc Care Pract* 2009b; 8(4):250-62.
4. Pinar G. Simulation-enhanced interprofessional education in health care. *Creative Educ* 2015;6:1852-9.
5. Deschodt M, Flamaing J, Haentjens P, *et al.* Impact of geriatric consultation teams on clinical outcome in acute hospitals: a systemic review and meta-analysis. *BMC Med* 2013;11:38.
6. Lapkin S, Levett-Jones T, Gilligan C. A systemic review of the effectiveness of interprofessional education in health professional programs. *Nurse Educ Today* 2013;33(2):90-102.
7. Interprofessional Education Collaborative Expert Panel. Core competencies for interprofessional collaborative practice: report of an expert panel. Washington, D.C.: Interprofessional Education Collaborative; 2001.
8. Baker C, Pulling C, McGraw R, *et al.* Simulation in interprofessional education for patient-centered collaborative care. *J Adv Nurs* 2008;64(4):372-9.
9. Undre S, Koutantji M, Sevdalis N, *et al.* Multidisciplinary crisis simulations: the way forward for training surgical teams. *World J Surg* 2007;31(9):1843-53.
10. Paige JT, Kozmenko V, Yang T, *et al.* High-fidelity, simulation-based, interdisciplinary operating room team training at the point of care. *Surgery* 2009;145(2):138-46.
11. Vyas D, McCulloh R, Dyer C, *et al.* An interprofessional course using human patient simulation to teach patient safety and teamwork skills. *Am J Pharm Educ* 2012;76(4):71.
12. Estis JM, Rudd AB, Pruitt B, Wright T. Interprofessional simulation-based education enhances student knowledge of health professional roles and care of patients with tracheostomies and Passy-Muir® Valves. *J Nurs Educ Practice* 2015;5(6):123.
13. Watters C, Reedy G, Ross A, *et al.* Does interprofessional simulation increase self-efficacy: a comparative study? *BMJ Open* 2015;5:e005472.
14. Jaye P, Thomas L, Reedy G. "The diamond": a structure for simulation debrief. *The Clinical Teacher*. 2015;12:171-175.
15. Darlow B, Coleman K, McKinlay E, *et al.* The positive impact of inter-professional education: a controlled trial to evaluate a programme for health professional students. *BMC Med Educ* 2015;15:98.
16. Ellis J. All inclusive benchmarking. *J Nurs Manag* 2006;14(5):377-83.
17. Ellis J. Sharing the evidence: clinical practice benchmarking to improve continuously the quality of care. *J Adv Nurs* 2000;32(1):215-25.
18. Byakika-Kibwika P, Kutesa A, Baingana R, *et al.* A situation analysis of inter-professional education and practice for ethics and professionalism training at Makerere University College and Health Sciences. *BMC Res Notes* 2015;8:598.
19. Luecht RM, Madsen MK, Taugher MP, *et al.* Assessing professional perceptions: design and validation of an Interdisciplinary Education Perception Scale. *J Allied Health* 1990;19(2):181-91.
20. Buelow J, McAdams R, Adams A, *et al.* Interdisciplinary teamwork: student differences and teaching implications. *Am J Health Sci* 2010;1(1):11-21.
21. Heinemann GD, Schmitt MH, Farrell MP, *et al.* Development of an Attitudes Toward Health Care Teams Scale. *Eval Health Prof* 1999;22(1):123-42.

22. Reese C, Jeffries PR, Engum SA. Learning together: using simulations to develop nursing and medical student collaboration. *Nurs Educ Perspect* 2011;31(1):33-37.
23. Robben S, Perry M, Nieuwenhuijzen L. van, *et al.* Impact of interprofessional education on collaboration attitudes, skills, and behavior among primary care professionals. *J Contin Educ Health Prof* 2012;32(3):196-204.
24. Oandasan I, Reeves S. Key elements of interprofessional education. Part 2: factors, processes and outcomes. *J Interprof Care* 2005;19(suppl 1): 39-48.
25. Chan LK, Patil NG, Chen JY, *et al.* Advantages of video trigger in problem-based learning. *Med Teach* 2010;32:760-5.
26. Balslev T, de Grave WS, Muijtjens AMM, *et al.* Comparison of text and video cases in a postgraduate problem-based learning format. *Med Educ* 2005;39(11):1086-92.
27. Salvatore VF. Evaluating training programs: The four levels, by Donald L. Kirkpatrick, Berrett-Koehler Publishers: *Am J Eval* 1998;19:259-61.
28. Baker C, Medves J, Luctkar-Flude M, Hopkins-Rossel D, *et al.* Evaluation of a simulation-based interprofessional educational module on adult suctioning using action research. *J Res Interprof Pract Educ* 2012; vol 2.2.
29. Luctkar-Flude M, Baker C, Hopkins-Rosseel D, *et al.* Development and evaluation of an interprofessional simulation-based learning module on infection control skills for prelicensure health professional students. *Clin Simul Nurse* 2014;10:395-405.
30. Luctkar-Flude M, Baker C, Pulling C, *et al.* Evaluating an undergraduate interprofessional simulation-based educational module: communication, teamwork, and confidence performing cardiac resuscitation skills. *Advan Med Educ Pract* 2010;1:59-66.
31. Puskar K, Mitchell AM, Lee H, *et al.* Simulated case studies illustrate interprofessional education for alcohol and drug use screening for healthcare professionals. *ARC J Nurs Healthcare* 2016;2(2):9-20.

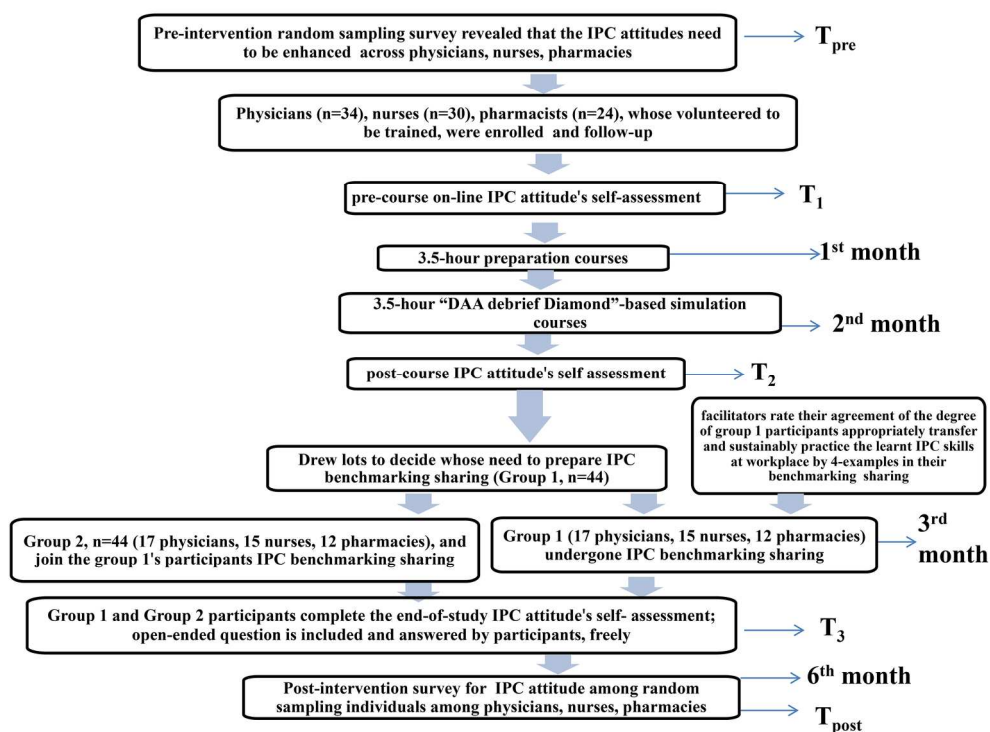

Fig. 1

189x144mm (300 x 300 DPI)



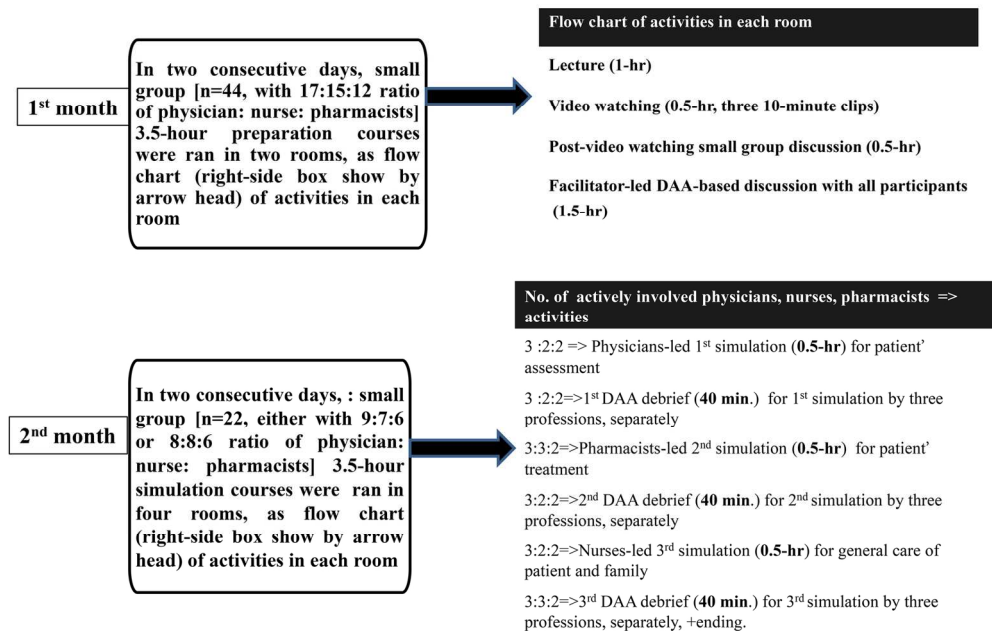

Fig. 2

160x102mm (300 x 300 DPI)

Review only



Fig. 3

152x114mm (300 x 300 DPI)

1  
2  
3  
4  
5  
6  
7  
8  
9  
10  
11  
12  
13  
14  
15  
16  
17  
18  
19  
20  
21  
22  
23  
24  
25  
26  
27  
28  
29  
30  
31  
32  
33  
34  
35  
36  
37  
38  
39  
40  
41  
42  
43  
44  
45  
46  
47

| <b>Supplement table 1</b> Interdisciplinary education perception scale (IEPS)                                                                                                                                                            |                                                                                                                                                                                                                                                                                                                                                                                                                                                                                                                                                                                                                     |
|------------------------------------------------------------------------------------------------------------------------------------------------------------------------------------------------------------------------------------------|---------------------------------------------------------------------------------------------------------------------------------------------------------------------------------------------------------------------------------------------------------------------------------------------------------------------------------------------------------------------------------------------------------------------------------------------------------------------------------------------------------------------------------------------------------------------------------------------------------------------|
| subclasses                                                                                                                                                                                                                               | statement                                                                                                                                                                                                                                                                                                                                                                                                                                                                                                                                                                                                           |
| competency and autonomy (8 items)                                                                                                                                                                                                        | 1. Individuals in my profession are well-trained.<br>2. Individuals in my profession demonstrate a great deal of autonomy.<br>3. Individuals in my profession are very positive about their goals and objectives.<br>4. Individuals in my profession are very positive about their contributions and accomplishments.<br>5. Individuals in my profession trust each other's professional judgment.<br>6. Individuals in my profession are extremely competent.<br>7. Individuals in other professions respect the work done by my profession.<br>8. Individuals in other professions think highly of my profession. |
| perceived need for cooperation (2 items)                                                                                                                                                                                                 | 9. Individuals in my profession need to cooperate with other professions.<br>10. Individuals in my profession must depend upon the work of people in other professions.                                                                                                                                                                                                                                                                                                                                                                                                                                             |
| perception of actual cooperation (5 items)                                                                                                                                                                                               | 11. Individuals in my profession are able to work closely with individuals in other professions.<br>12. Individuals in my profession are willing to share information and resources with other professionals.<br>13. Individuals in my profession have good relations with people in other professions.<br>14. Individuals in my profession think highly of other related professions.<br>15. Individuals in my profession work well with each other.                                                                                                                                                               |
| understanding others value (3 items)                                                                                                                                                                                                     | 16. Individuals in my profession have a higher status than individuals in other professions.<br>17. Individuals in my profession make every effort to understand the capabilities and contributions of other professions.<br>18. Individuals in other professions often seek the advice of people in my profession.                                                                                                                                                                                                                                                                                                 |
| Likert's Scale with 6 possible responses (1=Strongly Disagree, 2=Moderately Disagree, 3=Somewhat Disagree, 4=Somewhat Agree, 5=Moderately Agree, 6=Strongly Agree ); ** Higher scores represent more positive attitudes toward teamwork. |                                                                                                                                                                                                                                                                                                                                                                                                                                                                                                                                                                                                                     |

1  
2  
3  
4  
5  
6  
7  
8  
9  
10  
11  
12  
13  
14  
15  
16  
17  
18  
19  
20  
21  
22  
23  
24  
25  
26  
27  
28  
29  
30  
31  
32  
33  
34  
35  
36  
37  
38  
39  
40  
41  
42  
43  
44  
45  
46  
47

**Supplement table 2** Attitudes Toward Interprofessional Health Care Teams Scale (ATIHCTS)

| Subscales                             | STATEMENT                                                                                                                                                                                                                                                                                                                                                                                                                                                                                                                                                                              |
|---------------------------------------|----------------------------------------------------------------------------------------------------------------------------------------------------------------------------------------------------------------------------------------------------------------------------------------------------------------------------------------------------------------------------------------------------------------------------------------------------------------------------------------------------------------------------------------------------------------------------------------|
| quality of care delivery<br>(5 items) | 1. Developing an inter-professional patient care plan is excessively time consuming.<br>2. The give and take among team members helps them make better patient care decisions.<br>3. The inter-professional approach makes the delivery of care more efficient.<br>4. Developing a patient care plan with other team members avoids errors in delivering care.<br>5. The inter-professional approach improves the quality of care to patients                                                                                                                                          |
| patient-centered care<br>(4 items)    | 6. Patients receiving inter-professional care are more likely than others to be treated as whole persons.<br>7. Health professionals working as teams are more responsive than others to the emotional and financial needs of patients<br>8. The inter-professional approach permits health professionals to meet the needs of family caregivers as well as patients.<br>9. Hospital patients who receive inter-professional team care are better prepared for discharge than other patients.                                                                                          |
| team efficiency<br>(5 items)          | 10. Working in an inter-professional manner unnecessarily complicates things most of the time.<br>11. Working in an inter-professional environment keeps most health professionals enthusiastic and interested in their jobs.<br>12. In most instances, the time required for inter-professional consultations could be better spent in other ways<br>13. Having to report observations to a team helps team members better understand the work of other health professionals.<br>14. Team meetings foster communication among team members from different professions or disciplines. |

\* Likert's Scale with 5 possible responses (1=Strongly Disagree through 5=Strongly Agree);\*Higher scores represent more positive attitudes toward teamwork.

view only

**Supplement table 3** IPC core elements-based questionnaires used for pre-intervention and post-intervention random sampling survey of IPC attitudes

1. Are you familiar with IPC skills?
2. Do you agree that IPC helps understanding the role of other healthcare team members?
3. Do you agree that IPC improves quality of patient care?
4. Do you agree that IPC improves patient-centered care?
5. Do you agree that IPC improves team efficiency?

\* Likert's Scale with 5 possible responses (1=Strongly Disagree through 5=Strongly Agree);\* Higher scores represent better IPC attitudes

## Research check list

### Our article title had included the following point.

1. A structured abstract (max. 300 words) of: objectives, design, results and conclusion, or that meets the standards of the relevant reporting guideline (see below).
2. An 'Article summary' section consisting of three headings: 'Article focus' (up to three bullet points on the research questions or hypotheses addressed); 'Key messages' (up to three bullet points showing the key messages or significance of the study); and a 'Strengths and limitations of this study' section. This should be placed after the abstract.
3. The original protocol for the study, where one exists.
4. A funding statement, preferably worded as follows. Either: 'This work was supported by [name of funder] grant number [xxx]' or 'This research received no specific grant from any funding agency in the public, commercial or not-for-profit sectors'.
5. A competing interests statement.
6. Articles should list each author's contribution individually at the end; this section may also include contributors who do not qualify as authors.
7. Any checklist and flow diagram for the appropriate reporting statement, e.g. STROBE (see below).
8. Any article that contains personal medical information about an identifiable living individual requires the patient's explicit consent before we can publish it. We will need the patient to sign our [consent form](#), which requires the patient to have read the article. This form is available in multiple languages.
