# Supplementary material for: Simulation-based inter-professional education to improve attitudes towards collaborative practice: a prospective comparative pilot study in a Chinese medical centre
Source: PubMed Central journal article supplement — BMJ Open. 2017 Nov 8;7(11):e015105. doi: 10.1136/bmjopen-2016-015105 (PMC5695335; doi:10.1136/bmjopen-2016-015105), 2017-11-08
Supplement: bmjopen-2016-015105supp001.pdf [file bmjopen-2016-015105supp001.pdf]

**Supplement table 1** Interdisciplinary education perception scale (IEPS)

| subclasses                                                                                                                                                                                                                               | statement                                                                                                                                                                                                                                                                                                                                                                                                                                                                                                                                                                                                           |
|------------------------------------------------------------------------------------------------------------------------------------------------------------------------------------------------------------------------------------------|---------------------------------------------------------------------------------------------------------------------------------------------------------------------------------------------------------------------------------------------------------------------------------------------------------------------------------------------------------------------------------------------------------------------------------------------------------------------------------------------------------------------------------------------------------------------------------------------------------------------|
| competency and autonomy<br>(8 items)                                                                                                                                                                                                     | 1. Individuals in my profession are well-trained.<br>2. Individuals in my profession demonstrate a great deal of autonomy.<br>3. Individuals in my profession are very positive about their goals and objectives.<br>4. Individuals in my profession are very positive about their contributions and accomplishments.<br>5. Individuals in my profession trust each other's professional judgment.<br>6. Individuals in my profession are extremely competent.<br>7. Individuals in other professions respect the work done by my profession.<br>8. Individuals in other professions think highly of my profession. |
| perceived need for cooperation (2 items)                                                                                                                                                                                                 | 9. Individuals in my profession need to cooperate with other professions.<br>10. Individuals in my profession must depend upon the work of people in other professions.                                                                                                                                                                                                                                                                                                                                                                                                                                             |
| perception of actual cooperation<br>(5 items)                                                                                                                                                                                            | 11. Individuals in my profession are able to work closely with individuals in other professions.<br>12. Individuals in my profession are willing to share information and resources with other professionals.<br>13. Individuals in my profession have good relations with people in other professions.<br>14. Individuals in my profession think highly of other related professions.<br>15. Individuals in my profession work well with each other.                                                                                                                                                               |
| understanding others value (3 items)                                                                                                                                                                                                     | 16. Individuals in my profession have a higher status than individuals in other professions.<br>17. Individuals in my profession make every effort to understand the capabilities and contributions of other professions.<br>18. Individuals in other professions often seek the advice of people in my profession.                                                                                                                                                                                                                                                                                                 |
| Likert's Scale with 6 possible responses (1=Strongly Disagree, 2=Moderately Disagree, 3=Somewhat Disagree, 4=Somewhat Agree, 5=Moderately Agree, 6=Strongly Agree ); ** Higher scores represent more positive attitudes toward teamwork. |                                                                                                                                                                                                                                                                                                                                                                                                                                                                                                                                                                                                                     |

**Supplement table 2** Attitudes Toward Interprofessional Health Care Teams Scale (ATIHCTS)

| Subscales                             | STATEMENT                                                                                                                                                                                                                                                                                                                                                                                                                                                                                                                                                                              |
|---------------------------------------|----------------------------------------------------------------------------------------------------------------------------------------------------------------------------------------------------------------------------------------------------------------------------------------------------------------------------------------------------------------------------------------------------------------------------------------------------------------------------------------------------------------------------------------------------------------------------------------|
| quality of care delivery<br>(5 items) | 1. Developing an inter-professional patient care plan is excessively time consuming.<br>2. The give and take among team members helps them make better patient care decisions.<br>3. The inter-professional approach makes the delivery of care more efficient.<br>4. Developing a patient care plan with other team members avoids errors in delivering care.<br>5. The inter-professional approach improves the quality of care to patients                                                                                                                                          |
| patient-centered care<br>(4 items)    | 6. Patients receiving inter-professional care are more likely than others to be treated as whole persons.<br>7. Health professionals working as teams are more responsive than others to the emotional and financial needs of patients<br>8. The inter-professional approach permits health professionals to meet the needs of family caregivers as well as patients.<br>9. Hospital patients who receive inter-professional team care are better prepared for discharge than other patients.                                                                                          |
| team efficiency<br>(5 items)          | 10. Working in an inter-professional manner unnecessarily complicates things most of the time.<br>11. Working in an inter-professional environment keeps most health professionals enthusiastic and interested in their jobs.<br>12. In most instances, the time required for inter-professional consultations could be better spent in other ways<br>13. Having to report observations to a team helps team members better understand the work of other health professionals.<br>14. Team meetings foster communication among team members from different professions or disciplines. |

\* Likert's Scale with 5 possible responses (1=Strongly Disagree through 5=Strongly Agree);\*Higher scores represent more positive attitudes toward teamwork.

**Supplement table 3** IPC core elements-based questionnaires used for pre-intervention and post-intervention random sampling survey of IPC attitudes

1. Are you familiar with IPC skills?
2. Do you agree that IPC helps understanding the role of other healthcare team members?
3. Do you agree that IPC improves quality of patient care?
4. Do you agree that IPC improves patient-centered care?
5. Do you agree that IPC improves team efficiency?

\* Likert's Scale with 5 possible responses (1=Strongly Disagree through 5=Strongly Agree);\* Higher scores represent better IPC attitudes
